# Supplementary material for: Long-term exposure to traffic-related air pollution and progression of carotid artery atherosclerosis: a prospective cohort study
Source: PubMed Central journal article supplement — BMJ Open. 2014 Apr 5;4(4):e004743. doi: 10.1136/bmjopen-2013-004743 (PMC3987708; doi:10.1136/bmjopen-2013-004743), 2014-04-05
Supplement: bmjopen-2013-004743.draft_revisions.pdf [file bmjopen-2013-004743.draft_revisions.pdf]

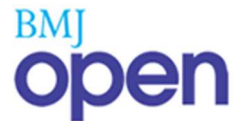

## Long-Term Exposure to Traffic-Related Air Pollution and Progression of Carotid Artery Atherosclerosis

|                                 |                                                                                                                                                                                                                                                                                                                                                                                                                                                                                     |
|---------------------------------|-------------------------------------------------------------------------------------------------------------------------------------------------------------------------------------------------------------------------------------------------------------------------------------------------------------------------------------------------------------------------------------------------------------------------------------------------------------------------------------|
| Journal:                        | <i>BMJ Open</i>                                                                                                                                                                                                                                                                                                                                                                                                                                                                     |
| Manuscript ID:                  | bmjopen-2013-004743                                                                                                                                                                                                                                                                                                                                                                                                                                                                 |
| Article Type:                   | Research                                                                                                                                                                                                                                                                                                                                                                                                                                                                            |
| Date Submitted by the Author:   | 27-Dec-2013                                                                                                                                                                                                                                                                                                                                                                                                                                                                         |
| Complete List of Authors:       | Gan, Wenqi; Hofstra North Shore-LIJ School of Medicine, Department of Population Health<br>Allen, Ryan; Simon Fraser University, Faculty of Health Sciences<br>Brauer, Michael; University of British Columbia, School of Population and Public Health<br>Davies, Hugh; University of British Columbia, School of Environmental Health<br>Mancini, John; University of British Columbia, Division of Cardiology<br>Lear, Scott; Simon Fraser University, Faculty of Health Sciences |
| <b>Primary Subject Heading</b>: | Occupational and environmental medicine                                                                                                                                                                                                                                                                                                                                                                                                                                             |
| Secondary Subject Heading:      | Cardiovascular medicine, Epidemiology, Public health                                                                                                                                                                                                                                                                                                                                                                                                                                |
| Keywords:                       | Cardiac Epidemiology < CARDIOLOGY, Coronary heart disease < CARDIOLOGY, OCCUPATIONAL & INDUSTRIAL MEDICINE, EPIDEMIOLOGY, PUBLIC HEALTH, PREVENTIVE MEDICINE                                                                                                                                                                                                                                                                                                                        |
|                                 |                                                                                                                                                                                                                                                                                                                                                                                                                                                                                     |

SCHOLARONE™  
Manuscripts

only

# Long-Term Exposure to Traffic-Related Air Pollution and Progression of Carotid Artery Atherosclerosis

Wen Qi Gan,<sup>1,2</sup> Ryan W. Allen,<sup>3</sup> Michael Brauer,<sup>4</sup>  
Hugh W. Davies,<sup>4</sup> G.B. John Mancini,<sup>5,6</sup> Scott A. Lear<sup>3,7,8</sup>

<sup>1</sup>Department of Population Health, Hofstra North Shore-LIJ School of Medicine, Great Neck, New York

<sup>2</sup>Feinstein Institute for Medical Research, North Shore-Long Island Jewish Health System, Great Neck, New York

<sup>3</sup>Faculty of Health Sciences, Simon Fraser University, Burnaby, British Columbia, Canada

<sup>4</sup>School of Population and Public Health, University of British Columbia, Vancouver, British Columbia, Canada

<sup>5</sup>Healthy Heart Program, St. Paul Hospital, Providence Healthcare, Vancouver, British Columbia, Canada

<sup>6</sup>Faculty of Medicine, Division of Cardiology, University of British Columbia, Vancouver, British Columbia, Canada

<sup>7</sup>Department of Biomedical Physiology and Kinesiology, Simon Fraser University, Burnaby, British Columbia, Canada

<sup>8</sup>Division of Cardiology, Providence Health Care, Vancouver, Canada

## Correspondence to:

Wen Qi Gan, MD PhD  
175 Community Drive, Room 235  
Great Neck, NY 11021  
Phone: 516-465-3053  
Fax: 516-465-2699  
E-mail: [wgan@nshs.edu](mailto:wgan@nshs.edu)

**Key Words:** air pollution, atherosclerosis, cohort studies, vehicle emissions

**Word Count (text): 4,104**

## ABSTRACT

**Background:** Epidemiologic studies have demonstrated associations between long-term exposure to traffic-related air pollution and coronary heart disease (CHD). Atherosclerosis is the principal pathological process responsible for CHD events, but effects of traffic-related air pollution on progression of atherosclerosis are not clear.

**Objectives:** To investigate associations between long-term exposure to traffic-related air pollution and progression of carotid artery atherosclerosis.

**Methods:** Healthy participants aged 30-65 years were recruited in Vancouver, Canada, and followed for approximately 5 years (N = 509). At baseline and end of follow-up, participants underwent carotid artery ultrasound examinations to assess atherosclerosis severity, including carotid intima-media thickness, plaque area, plaque number, and total area. Annual change of each atherosclerosis marker during the follow-up period was calculated as the difference between these two measurements divided by years of follow-up. Living close to major roads was defined as  $\leq 150$  meters from a highway or  $\leq 50$  meters from a major road. Residential exposures to traffic-related air pollutants were estimated using high-resolution land use regression models. The data were analyzed using covariate-adjusted general linear models.

**Results:** At baseline, there were no significant differences in any atherosclerosis markers between participants living close to and those living away from major roads. After follow-up, the differences in annual changes of these markers between these two groups were small and not statistically significant. Also, no significant associations were observed with concentrations of traffic-related air pollutants including black carbon, fine particles, nitrogen dioxide, and nitric oxide.

1  
2  
3 **Conclusions:** This study did not find significant associations between traffic-related air pollution  
4  
5 and progression of carotid artery atherosclerosis in a region with relatively low levels of air  
6  
7 pollution.  
8  
9

## 10 11 12 13 14 15 **ARTICLE SUMMARY**

### 16 17 **Strengths and limitations of this study**

- 18  
19  
20  
21  
22 • This study utilized multiple markers, including carotid intima-media thickness, plaque  
23 area, plaque number, and total area, to assess carotid artery atherosclerosis. Exposure to  
24 traffic-related air pollution was assessed using residential proximity to major roads and  
25 spatially resolved estimates of residential exposure to black carbon, fine particles,  
26 nitrogen dioxide, and nitric oxide.  
27  
28
- 29  
30  
31 • This study simultaneously investigated cross-sectional and longitudinal associations  
32 between exposure to traffic-related air pollution and carotid artery atherosclerosis in a  
33 large metropolitan area with relatively low levels of air pollution.  
34  
35
- 36  
37  
38 • Compared with previous longitudinal studies, this study has a relatively long follow-up  
39 period (median 5.4 years, range 3.7–7.2 years).  
40  
41
- 42  
43  
44 • Small sample size, moderate progression of atherosclerosis in the study sample, along  
45 with lower levels of ambient air pollution in the study region might limit our ability to  
46 detect presumably small effects of air pollution on progression of carotid artery  
47 atherosclerosis in this study.  
48  
49  
50  
51  
52  
53  
54  
55  
56  
57  
58  
59  
60

## INTRODUCTION

Convincing epidemiologic evidence has demonstrated that long-term exposure to ambient air pollution is associated with cardiovascular disease, especially coronary heart disease (CHD), morbidity and mortality.<sup>1</sup> Although the biologic mechanisms underlying the associations are not fully understood, it is well known that atherosclerosis is the principal pathological process responsible for chronic and acute CHD events.<sup>2-4</sup> Atherosclerosis is a chronic condition characterized by a progressive buildup of plaques in the large arteries, which may cause chronic ischemia due to insufficient blood supply and acute cardiac events due to plaques rupture and blood clot.<sup>2,3</sup> Epidemiologic studies have shown that severity of atherosclerosis measured by carotid intima-media thickness (CIMT) is able to predict future cardiovascular risk (e.g., CHD and stroke) for people without cardiovascular diseases.<sup>5-7</sup>

It has been hypothesized that particulate air pollution is associated with cardiovascular outcomes through two major pathways: promoting atherosclerosis progression and triggering acute cardiac events in individuals with severe atherosclerosis, especially vulnerable plaques.<sup>3,8</sup> Short-term exposure studies have provided sufficient evidence to support acute triggering effects of particulate air pollution.<sup>1</sup> Long-term exposure studies based on clinical outcomes presumably integrate both atherosclerosis progression and acute triggering effects, and thus have greater effect sizes than short-term exposure studies. However, these studies are unable to distinguish these two different adverse effects of particulate air pollution.<sup>1,8</sup> Evidence is needed to determine the role of particulate air pollution on progression of atherosclerosis.<sup>8</sup>

Experimental studies in animals with risk factors for atherosclerosis have provided some evidence that exposure to particulate air pollution is associated with accelerated progression of atherosclerosis.<sup>9,10</sup> However, there is limited epidemiologic evidence in humans to corroborate

1  
2  
3 these findings. Several cross-sectional studies have examined associations of atherosclerosis  
4 severity with residential proximity to road traffic and exposure to fine particulate air pollution,  
5 but their findings were not fully consistent.<sup>11-15</sup> Two recent longitudinal studies conducted in the  
6 United States have provided limited evidence to support an association between particulate air  
7 pollution and progression of atherosclerosis.<sup>16 17</sup> As suggested by Kunzli and colleagues,<sup>8</sup> it is  
8 necessary to further investigate the relationship between long-term air pollution exposure and  
9 progression of atherosclerosis.  
10  
11  
12  
13  
14  
15  
16  
17  
18

19  
20 Air pollution is a complex mixture of particles, gases, and liquids, mainly derived from  
21 the combustion of fossil fuels.<sup>18</sup> In metropolitan areas, road traffic is a major source of ambient  
22 air pollution, and produces strong spatial gradients in pollution concentrations.<sup>19</sup> It has been  
23 demonstrated that the concentrations of traffic-related air pollutants decrease exponentially from  
24 major roadways and approach background concentrations within about 150 meters.<sup>20 21</sup> Therefore,  
25 the distance from each person's residence to a major roadway may be used as a convenient  
26 surrogate for exposure to traffic-related air pollution.<sup>22</sup> We have previously demonstrated in a  
27 large population-based cohort study conducted in metropolitan Vancouver, Canada, that  
28 residential proximity to road traffic and traffic-related fine particulate air pollution (black carbon)  
29 were associated with increased risk of CHD hospitalization and mortality.<sup>23-25</sup>  
30  
31  
32  
33  
34  
35  
36  
37  
38  
39  
40  
41  
42

43  
44 Based on the previous studies, we used a longitudinal study design to investigate the  
45 associations between progression of carotid artery atherosclerosis and long-term exposure to  
46 traffic-related air pollution, indicated by residential proximity to major roads and residential  
47 concentrations of four major traffic-related air pollutants including black carbon, particulate  
48 matter < 2.5 µm in aerodynamic diameter (PM<sub>2.5</sub>), nitrogen dioxide (NO<sub>2</sub>), and nitric oxide (NO),  
49 in metropolitan Vancouver.  
50  
51  
52  
53  
54  
55  
56

## MATERIALS AND METHODS

### Participants and Study Design

The current study was based on the Multicultural Community Health Assessment Trial (M-CHAT), which was designed to compare body fat distribution in different ethnic groups. The M-CHAT study design has been described in detail elsewhere.<sup>26 27</sup> During 2004-2005, 829 apparently healthy volunteers aged 30-65 years and matched for body mass index (BMI) and ethnicity (Aboriginal, Chinese, European, and South Asian) were recruited in metropolitan Vancouver. During recruitment, individuals with the following characteristics were excluded: (1) having a prior diagnosis of cardiovascular disease or significant comorbidity such as diabetes or hypertension; (2) taking medications that affect cardiovascular risk factors such as lipid-lowering, antihypertensive, or hypoglycemic medications; (3) experiencing recent weight change more than 2.2 kg within recent three months; and (4) having significant prosthetics or amputations.

The participants were followed for approximately five years. Each participant underwent carotid artery ultrasound examinations to assess severity of atherosclerosis at baseline (2004-2005) and the end of follow-up (2009-2011). Residential proximity to major roads and exposures to traffic-related air pollutants were estimated based on participants' residential addresses at baseline. Various potential confounding factors were collected through standard questionnaires that were administered by trained interviewers. General linear models were used to examine cross-sectional and longitudinal associations of carotid artery atherosclerosis with residential traffic proximity and four major traffic-related air pollutants after adjustment for various potential confounding factors including residential exposure to community noise.

## Exposure Assessment

### *Residential Proximity to Major Roads*

Residential proximity to major roads was estimated based on participants' geocoded baseline residential addresses using a geographic information system (GIS). In DMTI ArcView street file dataset for British Columbia (Canmap Streetfiles, version 2006.3; DMTI Spatial, Markham, Ontario, Canada), road types in the study region were divided into two categories: highway (DMTI type 1 and 2 roads) including expressway (average traffic counts 114,000 vehicles/day) and principal highway (21,000 vehicles/day), or major road (DMTI type 3 and 4 roads) including secondary highway (18,000 vehicles/day) and major road (15,000 vehicles/day). Based on the differences in traffic volumes between highways and major roads,<sup>28</sup> and the previous findings that the concentrations of traffic-related air pollutants decrease exponentially from major roads and approach background concentrations within about 150 meters,<sup>20 21</sup> participants in the current study were divided into two groups: those living close to major roads, defined as  $\leq 150$  meters from a highway or  $\leq 50$  meters from a major road; and those living away from major roads.

### *Air Pollution Exposure Assessment*

The air pollution exposure assessment has been described in detail elsewhere.<sup>29-31</sup> High-resolution (10 meters) land-use regression (LUR) models were developed in the study region to estimate annual average concentrations for four major traffic-related air pollutants, including black carbon, PM<sub>2.5</sub>, NO<sub>2</sub>, and NO. The predictors and performance of these LUR models have been discussed in detail previously.<sup>24</sup> The LUR models were developed in 2003, and we have recently shown that the spatial patterns of traffic-related air pollution in Vancouver remained



1  
2  
3 stable between 2003 and 2010.<sup>32</sup> The air pollution data were assigned to participants through their  
4  
5 baseline residential addresses to approximate individual exposure to these traffic-related air  
6  
7 pollutants.  
8  
9

### 10 11 12 **Carotid Artery Atherosclerosis Assessment**

13  
14  
15 The assessment method for carotid artery atherosclerosis has been described in detail  
16  
17 elsewhere.<sup>27 33</sup> High-resolution B-mode ultrasonography equipped with a 10-MHz linear array  
18  
19 transducer was used. A uniform length of 10 mm in the far wall of the common carotid artery  
20  
21 within 2 cm proximal to the carotid bulb was selected for manual measurement of intima-media  
22  
23 thickness (IMT). In the selected area, the largest IMT without focal lesions was measured; the  
24  
25 average of the largest IMT in the left and right carotid arteries was calculated as a person's  
26  
27 carotid IMT (CIMT). A plaque was defined as any focal protrusion above the surrounding intima;  
28  
29 plaque number was counted in each carotid segment including common, internal, external carotid  
30  
31 arteries, and carotid bulb for two carotid arteries. The area of a single plaque was calculated as  
32  
33 the average lesion thickness (mm) multiplied by the lesion length (mm); and plaque area was  
34  
35 calculated as the sum of the area for each plaque (mm<sup>2</sup>). Total area (mm<sup>2</sup>) was calculated as the  
36  
37 sum of plaque area and IMT area measured in the left and right carotid arteries; IMT area (mm<sup>2</sup>)  
38  
39 was calculated as the average IMT (mm) multiplied by the length (20 mm) over which the IMT  
40  
41 was measured. These four atherosclerosis markers were included as outcome variables in the  
42  
43 current study, because they are related to cardiovascular risk factors and are able to predict future  
44  
45 cardiovascular events.<sup>5-7 33 34</sup>  
46  
47  
48  
49  
50  
51

52  
53 To evaluate the reproducibility of the measurement, 192 randomly selected participants  
54  
55 from the cohort had the measurements repeated by different technicians. The average difference  
56  
57

1  
2  
3 between two measurements was 0.3  $\mu\text{m}$  for CIMT, 0.39  $\text{mm}^2$  for plaque area, and 0.13  $\text{mm}^2$  for  
4  
5 total area. The differences were small and not statistically significant.  
6  
7  
8  
9

### 10 **Potential Confounding Factors**

11  
12 The following were important cardiovascular risk factors and were regarded as potential  
13  
14 confounding factors in our analyses: age, sex (male, or female), ethnicity (Aboriginal, Chinese,  
15  
16 European, or South Asian), BMI, cigarette smoking status (never, former, or current smoker),  
17  
18 educational attainment ( $\leq$  high school, or  $>$ high school), annual household income ( $<$  \$30,000;  
19  
20 \$30,000 to \$60,000; or  $\geq$  \$60,000), leisure time physical activity (hours per week), systolic blood  
21  
22 pressure (SBP), diastolic blood pressure (DBP), low-density lipoprotein cholesterol (LDL-C),  
23  
24 high-density lipoprotein cholesterol (HDL-C), and total cholesterol. In the analysis for traffic-  
25  
26 related air pollutants, community noise was also treated as a potential confounding factor.<sup>25</sup>  
27  
28  
29  
30

31  
32 The demographic and behavioral risk factors were collected through standard  
33  
34 questionnaires, which were administered by trained interviewers. Leisure time physical activity  
35  
36 was estimated based on average minutes each week spent in physical activity during the previous  
37  
38 year. Blood pressure was measured using an automated oscillometric office blood pressure  
39  
40 monitor (VSM MedTech Ltd, Coquitlam, Canada). After 10 minutes of seated rest, five  
41  
42 successive measurements were recorded; average SBP and DBP were calculated by averaging  
43  
44 these five readings. Meanwhile, fasting blood samples were collected to measure LDL-C, HDL-C,  
45  
46 and total cholesterol using standard enzymatic procedures in the same clinical laboratory.<sup>27</sup>  
47  
48  
49 Residential exposure to community noise (annual day-evening-night A-weighted equivalent  
50  
51 continuous noise levels,  $L_{\text{den}}$  dB(A)) was estimated based on baseline residential addresses and  
52  
53  
54  
55  
56  
57  
58  
59  
60

1  
2  
3 surrounding transportation information including road width, speed limits, traffic volume, and  
4  
5 fleet composition.<sup>35</sup>  
6  
7

8 Neighborhood socioeconomic status was assessed using neighborhood income quintiles  
9  
10 and neighborhood education quintiles derived from the 2006 Statistics Canada Census data.  
11  
12 Neighborhood income quintiles were calculated using the medians of household income in the  
13  
14 dissemination areas of the study region. Neighborhood education quintiles were calculated using  
15  
16 the percentages of people with certificate, diploma, or degree in the dissemination areas of the  
17  
18 study region.<sup>23</sup>  
19  
20  
21  
22  
23

## 24 **Statistical Analyses**

25  
26  
27 Baseline characteristics of participants were compared between the group living close to  
28  
29 and the group living away from major roads using a Chi-squared test for categorical variables,  
30  
31 two-sample t-test for normally distributed continuous variables, and Wilcoxon two-sample test  
32  
33 for skewed continuous variables. Correlations between pollutants were examined using  
34  
35 Spearman's rank correlation analysis.  
36  
37

38  
39 General linear models were used to compare carotid atherosclerosis levels between these  
40  
41 two groups. Annual change for each atherosclerosis marker during the follow-up period was  
42  
43 calculated as the difference between these two measurements (end of follow-up minus baseline)  
44  
45 divided by the number of years of follow-up. Adjusted differences of atherosclerosis levels  
46  
47 between these two groups were calculated using the group living away from major roads as the  
48  
49 reference category. In addition, we performed two sensitivity analyses for progression of  
50  
51 atherosclerosis. First, we repeated the above analyses for participants with increased severity of  
52  
53 atherosclerosis indicated by each atherosclerosis marker (annual change > 0). Second, we used  
54  
55  
56

1  
2  
3 the 85th percentile of annual change of each atherosclerosis marker as the cutoff point to identify  
4 participants with greater progression of atherosclerosis (events). The Cox proportional hazard  
5 models were used to calculate relative risks of having greater progression of atherosclerosis for  
6 participants living close to major roads compared with those living away from major roads. In the  
7 Cox models, person-years were calculated for each participant from the date of baseline  
8 examination to the date of follow-up examination.  
9  
10  
11  
12  
13  
14  
15  
16

17 To examine independent associations between residential traffic proximity and carotid  
18 artery atherosclerosis, statistical analyses were performed to control for various potential  
19 confounding variables through four models: model 1 was a crude unadjusted model; model 2 was  
20 adjusted for age (continuous), sex, and ethnicity; model 3 was further adjusted for BMI  
21 (continuous), smoking status, leisure time physical activity (continuous), educational attainment,  
22 and annual household income in addition to the covariates included in model 2; model 4 was  
23 further adjusted for SBP (continuous), LDL-C (continuous), HDL-C (continuous), neighborhood  
24 income quintiles, and neighborhood education quintiles in addition to the covariates included in  
25 model 3. In the analyses for the associations between traffic-related air pollutants and progression  
26 of carotid artery atherosclerosis, we calculated differences of annual changes for each  
27 atherosclerosis marker in relation to an interquartile range elevation in each traffic-related air  
28 pollutant after adjustment for community noise and those covariates included in model 4.  
29  
30  
31  
32  
33  
34  
35  
36  
37  
38  
39  
40  
41  
42  
43  
44

45 All statistical tests were 2-sided and were performed using SAS, version 9.3 (SAS  
46 Institute Inc., Cary, NC, USA).  
47  
48  
49  
50  
51  
52  
53  
54  
55  
56  
57  
58  
59  
60

## RESULTS

A total of 829 participants were recruited at baseline. 13 individuals did not perform the carotid ultrasound examination, and 56 individuals did not provide accurate residential addresses and thus could not be geocoded; these individuals were excluded, leaving 760 participants (92% of those recruited) with complete data at baseline. Among these participants, 509 completed the follow-up, with a follow-up rate of 67%, median follow-up time of 5.4 years (range 3.7–7.2 years). Compared with those lost to follow-up, participants who completed follow-up had higher socioeconomic status (e.g., better education, higher annual household income) and better health profiles (e.g., more never smokers, lower BMI and waist circumference); however, there were no significant differences between the two groups in the baseline carotid artery atherosclerosis (see table 1 and table 2 in the Online Appendix).

Baseline annual average concentrations of traffic-related air pollutants and annual average levels of community noise are summarized in table 1. Overall, air pollution and community noise levels were not strongly correlated; also, air pollutants were not strongly correlated with each other, with the exception of NO and NO<sub>2</sub> (table 1). These results are consistent with those of our previous studies performed in the study region.

At baseline, 117 (23%) participants lived close to major roads. As expected, compared with those living away from major roads, participants living close to major roads were exposed to higher levels of traffic-related air pollutants and community noise (table 1); furthermore, these participants had lower annual household income, were more likely to be Aboriginal and less likely to be of South Asian origin. There were no substantial differences between these two groups with respect to age, sex, education, BMI, smoking status, alcohol intake, physical activity, blood pressure, and blood lipids (table 2).

1  
2  
3 At baseline, compared with those living away from major roads, participants living close  
4 to major roads had similar levels of carotid atherosclerosis measured by CIMT, plaque area,  
5 plaque number, and total area. After adjustment for various potential confounding factors in  
6 models 2-4, there were no significant differences between these two groups in these  
7 atherosclerosis markers (table 3).  
8  
9

10  
11  
12  
13  
14  
15 After five years of follow-up, atherosclerosis levels were increased for most participants  
16 (see etable 3 in the Online Appendix). Overall, the mean values of annual changes for these  
17 atherosclerosis markers were similar between these two groups; the differences in annual changes  
18 of these markers between these two groups were small and not statistically significant after  
19 adjustment for various potential confounding factors in models 2-4 (table 4). When the analyses  
20 were repeated for participants with increased atherosclerosis indicated by each single marker, the  
21 results were similar to those presented in table 4 (see etable 4 in the Online Appendix); when the  
22 85th percentile of annual change of each marker was used to identify participants with greater  
23 progression, the risk of having greater progression was not significantly different between these  
24 two groups (see etable 5 in the Online Appendix). Similarly, there were no significant  
25 associations between annual changes in these atherosclerosis markers and traffic-related air  
26 pollutants, including black carbon, PM<sub>2.5</sub>, NO<sub>2</sub>, and NO, after adjustment for various potential  
27 confounding factors including residential exposure to community noise (table 5). There were no  
28 substantial differences between the results from the final models with and without community  
29 noise.  
30  
31  
32  
33  
34  
35  
36  
37  
38  
39  
40  
41  
42  
43  
44  
45  
46  
47  
48  
49

50 The stratified analyses show that atherosclerosis effects associated with exposure to road  
51 traffic were stronger for participants with the following characteristics: male, Chinese and South  
52 Asian background, higher family income, obesity, and never smokers (table 6). The results for  
53  
54  
55  
56

1  
2  
3 some strata (e.g. age  $\geq$  60 years) were not completely consistent across different atherosclerosis  
4  
5 markers.  
6  
7  
8  
9

## 10 DISCUSSION

11  
12 In this longitudinal study with over five years of follow-up, we did not find significant  
13  
14 associations between residential exposure to traffic-related air pollution and carotid artery  
15  
16 atherosclerosis in either cross-sectional or longitudinal analyses. Our results were largely  
17  
18 consistent for various markers of carotid artery atherosclerosis including CIMT, plaque area,  
19  
20 plaque number, and total area and for various traffic exposure indicators including residential  
21  
22 traffic proximity, black carbon, PM<sub>2.5</sub>, NO<sub>2</sub>, and NO. This study has several strengths including  
23  
24 its longitudinal study design, the relatively long follow-up period, multiple markers of carotid  
25  
26 artery atherosclerosis, various traffic exposure indicators, and control for various potential  
27  
28 confounding factors in the statistical analyses.  
29  
30  
31  
32  
33

34 As measurement error in the ultrasound examination of carotid atherosclerosis might have  
35  
36 prevented detection of very subtle effects of air pollution on carotid atherosclerosis, we  
37  
38 performed two sensitivity analyses by restricting analyses to participants with increased  
39  
40 atherosclerosis and by using the 85th percentile of annual change of each marker to identify  
41  
42 participants with greater progression of atherosclerosis. The results of these sensitivity analyses  
43  
44 are similar to those observed in the main analyses, suggesting that the null associations were less  
45  
46 likely due to measurement error in atherosclerosis assessment. For those covariates included in  
47  
48 the final models, age, sex, race, and LDL-C levels were each significantly associated with  
49  
50 progression of carotid artery atherosclerosis indicated by plaque area, plaque number, and total  
51  
52  
53  
54  
55  
56  
57  
58  
59  
60

1  
2  
3 area, but not by CIMT ( $P > 0.05$  for all covariates). We did not find significant associations of  
4  
5 carotid artery atherosclerosis with BMI, smoking, physical activity, or blood pressure.  
6  
7

8 Compared with the two recent longitudinal studies (see table 6 in the Online Appendix)  
9  
10 by Adar *et al*<sup>16</sup> and Kunzli *et al*,<sup>17</sup> our study is different in the following four aspects: (1) on  
11  
12 average, our participants were more than 10 years younger (baseline mean age 47 years versus 62  
13  
14 and 59 years); (2) the study region had relatively low levels of ambient PM<sub>2.5</sub> (baseline annual  
15  
16 mean concentration 4.1 µg/m<sup>3</sup> versus 16.6 and 27.8 µg/m<sup>3</sup>); (3) our participants did not have  
17  
18 comorbid conditions such as diabetes and hypertension at baseline; and (4) the current study took  
19  
20 into account the potential influences of community noise on the associations between traffic-  
21  
22 related air pollutants and progression of carotid artery atherosclerosis. These differences may  
23  
24 partly explain the null associations in our study. Overall, our baseline CIMT ( $673 \pm 122$  µm) and  
25  
26 annual change in CIMT ( $9.2 \pm 12.1$  µm/yr) were comparable with those by Adar *et al* ( $678 \pm 189$   
27  
28 µm,  $14.0 \pm 53.0$  µm/yr),<sup>16</sup> but were quite different from those of Kunzli *et al* ( $780 \pm 150$  µm,  $2.0$   
29  
30  $\pm 12.9$  µm/yr),<sup>17</sup> perhaps because the former is based upon a multi-ethnic sample, similar to our  
31  
32 study; whereas the latter was based on the data from five clinical trials in which the interventions  
33  
34 might have played a role in reducing progression of carotid artery atherosclerosis.  
35  
36  
37  
38  
39  
40

41 It should be noted that the findings of the two recent longitudinal studies were not entirely  
42  
43 consistent.<sup>16 17</sup> Adar *et al* found that a 2.5 µg/m<sup>3</sup> increase in PM<sub>2.5</sub> was associated with a 5.0 µm  
44  
45 (95% CI, 2.6 to 7.4 µm) annual increase in CIMT; however, the association was observed for  
46  
47 within- but not between-city contrasts.<sup>16</sup> Kunzli *et al* reported that a 10 µg/m<sup>3</sup> elevation in PM<sub>2.5</sub>  
48  
49 was associated with a non-significant 2.5 µm (95% CI, -0.3 to 5.4 µm) annual increase in CIMT;  
50  
51 however, living close to a major roadway was associated with a 5.5 µm (95% CI, 0.13-10.79 µm)  
52  
53 annual increase in CIMT compared with those living away from a major roadway.<sup>17</sup> In addition,  
54  
55  
56  
57  
58  
59  
60



1  
2  
3 the findings of previous cross-sectional studies were also not consistent. Kunzli *et al* reported a  
4  
5 positive but non-significant association between PM<sub>2.5</sub> and CIMT using the baseline data from  
6  
7 two clinical trials in Los Angeles.<sup>11</sup> Based on the MESA Air baseline data, Diez Roux *et al* found  
8  
9 that PM<sub>2.5</sub> was associated with CIMT, but no significant association was observed with coronary  
10  
11 artery calcification;<sup>12</sup> Allen *et al* found that aortic calcification was associated with PM<sub>2.5</sub> among  
12  
13 participants with long-term residence, but no significant association was observed with residential  
14  
15 traffic proximity.<sup>13</sup> Based on the baseline data from a Germany study conducted in Ruhr area,  
16  
17 Hoffmann *et al* found that traffic proximity, but not PM<sub>2.5</sub>, was associated with coronary artery  
18  
19 calcification;<sup>14</sup> whereas Bauer *et al* found that PM<sub>2.5</sub>, but not traffic proximity, was associated  
20  
21 with CIMT.<sup>15</sup> Recently, in a panel study with 380 participants, Wilker *et al* found that a 0.26  
22  
23 µg/m<sup>3</sup> (interquartile range) increase in black carbon concentrations was associated with a 1.1%  
24  
25 increase in CIMT (95% CI, 0.4-1.7%).<sup>36</sup> Also, several recent cross-sectional studies have  
26  
27 consistently found significant associations of CIMT with biomass fuel<sup>37</sup> and traffic-related air  
28  
29 pollution.<sup>38,39</sup> In the current study, we did not find significant associations of CIMT or other  
30  
31 markers with traffic related air pollution. The findings of these studies show that inconsistencies  
32  
33 are existent within and between different studies on the relationship between ambient air  
34  
35 pollution and severity of atherosclerosis, although these measurements (e.g., CIMT and coronary  
36  
37 artery calcification) may reflect different atherosclerotic processes.  
38  
39  
40  
41  
42  
43  
44

45  
46 There are some limitations in our study that might have potentially affected the study  
47  
48 results. Residential proximity to road traffic is a convenient but crude surrogate for residential  
49  
50 exposure to traffic-related air pollution. First, geocoding of residential addresses in a GIS might  
51  
52 have introduced positional error.<sup>40</sup> Given the sharp concentration gradients of traffic-related air  
53  
54 pollution near major roads, the positional error might have introduced some exposure  
55  
56

1  
2  
3 misclassification. Second, residential traffic proximity did not take into account environmental  
4  
5 factors that might have affected actual residential exposure such as wind direction, street  
6  
7 canyons,<sup>41</sup> housing characteristics,<sup>42</sup> and indoor infiltration of air pollutants.<sup>43</sup> Third, although  
8  
9 residential exposure is able to reasonably reflect personal exposure,<sup>44 45</sup> individual factors such as  
10  
11 time spent in home, outdoor activity, and occupational exposure might have affected actual  
12  
13 personal exposure. Fourth, our exposure assessment was based on participants' baseline  
14  
15 residential addresses, we did not have residential history information during the follow-up period.  
16  
17 Exposure misclassification might have occurred for those who changed their residences and  
18  
19 therefore their exposure status. Overall, all these factors would be expected to cause  
20  
21 nondifferential exposure misclassification, reducing our ability to uncover the true relationship  
22  
23 between traffic-related air pollution and carotid artery atherosclerosis.  
24  
25  
26  
27  
28

29  
30 Loss to follow-up was another limitation of the current study. 33% of participants were  
31  
32 lost to follow-up, leaving a relatively small sample of 509 individuals. Overall, participants who  
33  
34 completed follow-up had higher socioeconomic status and better health profiles compared with  
35  
36 those lost to follow-up. Therefore loss to follow-up, in combination with the relatively small  
37  
38 sample size, might potentially contribute to the null associations in our study. Finally, after the  
39  
40 first ultrasound examination of carotid atherosclerosis, it was possible that some participants  
41  
42 might have taken medications (e.g., statins) that were able to reduce progression of  
43  
44 atherosclerosis.<sup>46</sup> We did not have information on medication use during the follow-up period.  
45  
46  
47 Nevertheless, as mentioned before, we did exclude persons who took relevant medications at  
48  
49 baseline. Also, this was a group of healthy people who did not have cardiovascular diseases or  
50  
51 comorbid conditions. Therefore, they were less likely to take medications such as statins during  
52  
53 the follow-up period.  
54  
55  
56  
57  
58  
59  
60

1  
2  
3 Furthermore, this study has a smaller sample size compared with two recently reported  
4 cohort studies.<sup>16 17</sup> It should be noted, however, that some previous studies with small sample  
5 sizes are still able to detect significant associations of CIMT with black carbon (N = 380),<sup>36</sup>  
6 biomass fuel (N = 266),<sup>37</sup> and residential traffic proximity (N = 777 in a subgroup).<sup>17</sup> Based on  
7 these studies, it was possible for our study (N = 509) to detect a significant association between  
8 traffic-related air pollution and carotid artery atherosclerosis if the association was really existent  
9 in the population.  
10  
11  
12  
13  
14  
15  
16  
17  
18

19 As previously mentioned, in a population-based cohort study conducted in the same study  
20 region and using the same exposure metrics,<sup>23</sup> we found that residential proximity to road traffic  
21 was associated with an increased risk of CHD mortality, whereas changes in traffic proximity  
22 were associated with altered risk of coronary mortality within a relatively short period of time.  
23 Moving closer to major roads was associated with increased risk, whereas moving away from  
24 major roads was associated with decreased risk. These previous findings, in conjunction with the  
25 null associations between traffic proximity and carotid artery atherosclerosis in the current study,  
26 indicate that triggering of acute cardiac events might play an important role in the associations  
27 between traffic-related air pollution and cardiovascular outcomes.  
28  
29  
30  
31  
32  
33  
34  
35  
36  
37  
38  
39  
40  
41  
42

## 43 CONCLUSIONS

44  
45 In this five-year longitudinal study, we did not find significant associations between  
46 residential exposure to traffic-related air pollution and progression of carotid artery  
47 atherosclerosis in a region with relatively low levels of air pollution. Because the findings of  
48 previous studies are not fully consistent, more research is needed to determine the relationship  
49 between long-term exposure to traffic-related air pollution and progression of atherosclerosis.  
50  
51  
52  
53  
54  
55  
56

1  
2  
3 **Contributors:** All authors contributed to the study conception and design. SAL, MB, RWA,  
4  
5 HWD, GBM contributed to the data collection. WQG analyzed the data and was responsible for  
6  
7 the accuracy of the data analysis. WQG wrote the first draft of the manuscript, all authors  
8  
9 critically revised the manuscript for important intellectual content. All authors have read and  
10  
11 approved the final version of the manuscript.  
12  
13

14  
15 **Funding:** This research received no specific grant from any funding agency in the public,  
16  
17 commercial or not-for-profit sectors.  
18

19  
20 **Competing interests:** None.  
21

22 **Ethics approval:** The study protocol was approved by the Simon Fraser University Research  
23  
24 Ethics Board, and all participants provided informed consent.  
25  
26

27 **Provenance and peer review:** Not commissioned; externally peer reviewed.  
28

29 **Data sharing statement:** No additional data are available.  
30  
31  
32  
33  
34  
35  
36  
37  
38  
39  
40  
41  
42  
43  
44  
45  
46  
47  
48  
49  
50  
51  
52  
53  
54  
55  
56  
57  
58  
59  
60

**Table 1.** Baseline average concentrations of traffic-related air pollutants, average levels of community noise, and correlation coefficients<sup>a</sup>

| Pollutant                              | Mean (SD)<br>(close to<br>major roads) <sup>b</sup> | Mean (SD)<br>(away from<br>major roads) <sup>c</sup> | Mean (SD)   | Median | IQR       | Range     | Correlation coefficient |                   |                 |      |       |
|----------------------------------------|-----------------------------------------------------|------------------------------------------------------|-------------|--------|-----------|-----------|-------------------------|-------------------|-----------------|------|-------|
|                                        |                                                     |                                                      |             |        |           |           | BC                      | PM <sub>2.5</sub> | NO <sub>2</sub> | NO   | Noise |
| BC (10 <sup>-5</sup> /m) <sup>d</sup>  | 3.03 (1.60)                                         | 1.24 (0.71)                                          | 1.65 (1.24) | 1.08   | 0.89-1.90 | 0.0-5.00  | 1.00                    | --                | --              | --   | --    |
| PM <sub>2.5</sub> (µg/m <sup>3</sup> ) | 4.27 (1.54)                                         | 4.03 (1.42)                                          | 4.08 (1.45) | 4.09   | 3.40-4.81 | 0.0-10.00 | 0.13                    | 1.00              | --              | --   | --    |
| NO <sub>2</sub> (µg/m <sup>3</sup> )   | 19.1 (4.2)                                          | 16.6 (3.9)                                           | 17.2 (4.1)  | 16.5   | 14.6-18.7 | 7.9-30.0  | 0.38                    | 0.45              | 1.00            | --   | --    |
| NO (µg/m <sup>3</sup> )                | 39.0 (15.7)                                         | 24.1 (6.7)                                           | 27.6 (11.4) | 24.9   | 20.5-31.3 | 8.4-100.0 | 0.51                    | 0.43              | 0.73            | 1.00 | --    |
| Noise (dB(A))                          | 73.9 (6.2)                                          | 65.4 (5.3)                                           | 67.4 (6.6)  | 65.3   | 63.2-71.8 | 37.1-83.4 | 0.40                    | 0.19              | 0.28            | 0.41 | 1.00  |

Abbreviations: BC, black carbon; IQR, interquartile range; NO, nitric oxide; NO<sub>2</sub>, nitrogen dioxide; PM<sub>2.5</sub>, particulate matter < 2.5 µm in aerodynamic diameter; SD, standard deviation.

<sup>a</sup>The results are derived from all participants, unless otherwise specified.

<sup>b</sup>For participants living close to major roads.

<sup>c</sup>For participants living away from major roads.

<sup>d</sup>10<sup>-5</sup>/m black carbon ≈ 0.8 µg/m<sup>3</sup> elemental carbon.

**Table 2.** Baseline characteristics of participants stratified by traffic proximity<sup>a</sup>

| Characteristic                                  | All participants (n = 509) | Close to major roads (n = 117) | Away from major roads (n = 392) | P value <sup>b</sup> |
|-------------------------------------------------|----------------------------|--------------------------------|---------------------------------|----------------------|
| Age (year)                                      | 46.8 ± 9.0                 | 47.2 ± 9.2                     | 46.7 ± 8.9                      | 0.581                |
| Sex, male (%)                                   | 49                         | 51                             | 49                              | 0.593                |
| Race (%)                                        |                            |                                |                                 | 0.008                |
| Aboriginal                                      | 14                         | 22                             | 12                              |                      |
| Chinese                                         | 30                         | 32                             | 29                              |                      |
| European                                        | 29                         | 27                             | 30                              |                      |
| South Asian                                     | 27                         | 19                             | 29                              |                      |
| Education (%)                                   |                            |                                |                                 | 0.589                |
| ≤ High school                                   | 27                         | 29                             | 27                              |                      |
| > High school                                   | 73                         | 71                             | 73                              |                      |
| Annual household income (%)                     |                            |                                |                                 | 0.019                |
| < \$30,000                                      | 24                         | 29                             | 22                              |                      |
| \$30,000 to \$60,000                            | 37                         | 43                             | 35                              |                      |
| ≥ \$60,000                                      | 39                         | 28                             | 43                              |                      |
| Smoke status (%)                                |                            |                                |                                 | 0.357                |
| Current                                         | 7                          | 9                              | 6                               |                      |
| Former                                          | 27                         | 24                             | 28                              |                      |
| Never                                           | 66                         | 67                             | 66                              |                      |
| Alcohol intake (yes, %)                         | 32                         | 30                             | 32                              | 0.649                |
| Physical activity <sup>c</sup> (hours per week) | 3.5<br>(1.7 – 6.5)         | 2.9<br>(1.6 – 6.5)             | 1.3<br>(0.9 – 1.8)              | 0.258                |
| Body mass index (kg/m <sup>2</sup> )            | 27.2 ± 4.7                 | 27.5 ± 4.3                     | 27.1 ± 4.8                      | 0.459                |
| SBP (mmHg)                                      | 118 ± 15                   | 117 ± 14                       | 118 ± 15                        | 0.357                |
| DBP (mmHg)                                      | 77 ± 9                     | 77 ± 10                        | 77 ± 9                          | 0.826                |
| Total cholesterol (mmol/L)                      | 5.2 ± 1.0                  | 5.2 ± 1.1                      | 5.3 ± 1.0                       | 0.667                |
| LDL-C (mmol/L)                                  | 3.2 ± 0.9                  | 3.2 ± 0.9                      | 3.3 ± 0.9                       | 0.311                |
| HDL-C (mmol/L)                                  | 1.3 ± 0.4                  | 1.3 ± 0.4                      | 1.3 ± 0.4                       | 0.637                |

Abbreviations: DBP, diastolic blood pressure; HDL-C, high-density lipoprotein cholesterol; LDL-C, low-density lipoprotein cholesterol; MET, metabolic equivalent of task; SBP, systolic blood pressure.

<sup>a</sup>Data are presented as percentage for categorical variables or mean ± SD for continuous variables; unless otherwise specified.

<sup>b</sup>For comparisons between the group close to and the group away from major roads.

<sup>c</sup>Median (interquartile range).

**Table 3.** Cross-sectional mean differences (95% CIs) in baseline carotid artery atherosclerosis between the group close to and the group away from major road (the reference category)

| Atherosclerosis                | Close to major roads (n = 117) <sup>a</sup> | Away from major roads (n = 392) <sup>a</sup> | Difference <sup>bc</sup> (model 1) | Difference <sup>bc</sup> (model 2) | Difference <sup>bc</sup> (model 3) | Difference <sup>bc</sup> (model 4) |
|--------------------------------|---------------------------------------------|----------------------------------------------|------------------------------------|------------------------------------|------------------------------------|------------------------------------|
| CIMT (μm)                      | 664 ± 125                                   | 673 ± 118                                    | -9.37<br>(-35.24 to 16.49)         | -12.78<br>(-35.32 to 9.76)         | -13.76<br>(-36.17 to 8.64)         | -8.7<br>(-31.15 to 13.75)          |
| Plaque area (mm <sup>2</sup> ) | 5.37 ± 8.10                                 | 6.62 ± 11.85                                 | -1.25<br>(-3.65 to 1.14)           | -1.62<br>(-3.89 to 0.66)           | -1.45<br>(-3.74 to 0.85)           | -0.88<br>(-3.19 to 1.43)           |
| Plaque number                  | 0.83 ± 0.93                                 | 0.90 ± 1.19                                  | -0.07<br>(-0.31 to 0.18)           | -0.12<br>(-0.36 to 0.12)           | -0.11<br>(-0.35 to 0.13)           | -0.05<br>(-0.29 to 0.19)           |
| Total area (mm <sup>2</sup> )  | 18.6 ± 9.0                                  | 20.1 ± 13.0                                  | -1.45<br>(-4.08 to 1.18)           | -1.88<br>(-4.3 to 0.54)            | -1.73<br>(-4.17 to 0.71)           | -1.07<br>(-3.51 to 1.38)           |

Abbreviation: CIMT, carotid intima-media thickness.

<sup>a</sup>Data are presented as mean ± standard deviation.

<sup>b</sup>Difference of least squares means between the group close to and the group away from major roads (the group away from major roads was the reference category).

<sup>c</sup>Model 1 was a crude unadjusted model; model 2 was adjusted for age, sex, and ethnicity; model 3 was further adjusted for BMI, smoking status, physical activity, education, and annual household income; model 4 was additionally adjusted for systolic blood pressure, LDL-C, HDL-C, neighborhood income levels, and neighborhood education levels.

**Table 4.** Mean differences (95% CIs) in annual changes of carotid artery atherosclerosis between the group close to and the group away from major road (the reference category)

| Atherosclerosis                     | Close to major roads (n = 117) <sup>a</sup> | Away from major roads (n = 392) <sup>a</sup> | Difference <sup>bc</sup> (model 1) | Difference <sup>bc</sup> (model 2) | Difference <sup>bc</sup> (model 3) | Difference <sup>bc</sup> (model 4) |
|-------------------------------------|---------------------------------------------|----------------------------------------------|------------------------------------|------------------------------------|------------------------------------|------------------------------------|
| CIMT (µm/year)                      | 8.93 ± 10.57                                | 9.41 ± 12.29                                 | -0.49<br>(-3.07 to 2.09)           | -1.01<br>(-3.62 to 1.61)           | -1.02<br>(-3.66 to 1.63)           | -0.78<br>(-3.49 to 1.92)           |
| Plaque area (mm <sup>2</sup> /year) | 1.35 ± 2.72                                 | 1.26 ± 2.25                                  | 0.09<br>(-0.42 to 0.6)             | 0.03<br>(-0.46 to 0.52)            | 0.03<br>(-0.46 to 0.53)            | 0.07<br>(-0.42 to 0.57)            |
| Plaque number (per year)            | 0.14 ± 0.21                                 | 0.13 ± 0.20                                  | 0.02<br>(-0.03 to 0.06)            | 0.01<br>(-0.03 to 0.05)            | 0.01<br>(-0.04 to 0.05)            | 0.01<br>(-0.04 to 0.05)            |
| Total area (mm <sup>2</sup> /year)  | 1.52 ± 2.79                                 | 1.43 ± 2.30                                  | 0.09<br>(-0.43 to 0.61)            | 0.03<br>(-0.47 to 0.53)            | 0.03<br>(-0.47 to 0.54)            | 0.08<br>(-0.43 to 0.59)            |

Abbreviation: CIMT, carotid intima-media thickness.

<sup>a</sup>Data are presented as mean ± standard deviation.

<sup>b</sup>Difference of least squares means between the group close to and the group away from major roads (the group away from major roads was the reference category).

<sup>c</sup>Model 1 was a crude unadjusted model; model 2 was adjusted for age, sex, and ethnicity; model 3 was further adjusted for BMI, smoking status, physical activity, education, and annual household income; model 4 was additionally adjusted for systolic blood pressure, LDL-C, HDL-C, neighborhood income levels, and neighborhood education levels.



**Table 5.** Changes in annual changes of carotid artery atherosclerosis associated with an IQR elevation in traffic-related air pollutants and community noise<sup>a</sup>

| Atherosclerosis                           | Black carbon<br>( $1.01 \times 10^{-5}/\text{m}$ ) <sup>b</sup> | PM <sub>2.5</sub><br>( $1.41 \mu\text{g}/\text{m}^3$ ) <sup>b</sup> | NO <sub>2</sub><br>( $4.07 \mu\text{g}/\text{m}^3$ ) <sup>b</sup> | NO<br>( $10.83 \mu\text{g}/\text{m}^3$ ) <sup>b</sup> | Noise<br>(8.69 dB(A)) <sup>bc</sup> |
|-------------------------------------------|-----------------------------------------------------------------|---------------------------------------------------------------------|-------------------------------------------------------------------|-------------------------------------------------------|-------------------------------------|
| CIMT ( $\mu\text{m}/\text{year}$ )        | -0.32<br>(-1.41 to 0.78)                                        | 0.20<br>(-0.99 to 1.39)                                             | -0.06<br>(-1.36 to 1.23)                                          | -1.07<br>(-2.47 to 0.32)                              | -0.66<br>(-2.44 to 1.12)            |
| Plaque area ( $\text{mm}^2/\text{year}$ ) | -0.08<br>(-0.28 to 0.12)                                        | 0.18<br>(-0.04 to 0.39)                                             | 0.07<br>(-0.17 to 0.31)                                           | 0.10<br>(-0.16 to 0.35)                               | 0.16<br>(-0.16 to 0.49)             |
| Plaque number (per year)                  | -0.00<br>(-0.02 to 0.02)                                        | 0.02<br>(-0.00 to 0.03)                                             | 0.01<br>(-0.01 to 0.03)                                           | 0.01<br>(-0.01 to 0.03)                               | 0.02<br>(-0.01 to 0.04)             |
| Total area ( $\text{mm}^2/\text{year}$ )  | -0.08<br>(-0.29 to 0.12)                                        | 0.17<br>(-0.05 to 0.40)                                             | 0.08<br>(-0.17 to 0.32)                                           | 0.08<br>(-0.18 to 0.34)                               | 0.17<br>(-0.16 to 0.50)             |

Abbreviations: CIMT, carotid intima-media thickness; IQR, interquartile range; NO, nitric oxide; NO<sub>2</sub>, nitrogen dioxide; PM<sub>2.5</sub>, particulate matter < 2.5  $\mu\text{m}$  in aerodynamic diameter;

<sup>a</sup>Adjusted for age, sex, ethnicity, BMI, smoking status, physical activity, education, annual household income, systolic blood pressure, LDL-C, HDL-C, neighborhood income levels, and neighborhood education levels. In the analysis for each air pollutant, community noise was included as a covariate; in the analysis for community noise, black carbon, PM<sub>2.5</sub>, and NO<sub>2</sub> were included as covariates.

<sup>b</sup>Interquartile range for the pollutant.

<sup>c</sup>Annual day-evening-night A-weighted equivalent continuous noise level.

**Table 6.** Mean differences (95% CIs) in annual changes of carotid artery atherosclerosis between the group close to and the group away from major road (the reference category)<sup>a</sup>

|                                                 | CIMT ( $\mu\text{m}$ ) | Plaque area ( $\text{mm}^2$ ) | Plaque number              | Total area ( $\text{mm}^2$ )  |
|-------------------------------------------------|------------------------|-------------------------------|----------------------------|-------------------------------|
| Age                                             |                        |                               |                            |                               |
| < 60 yr                                         | -0.76 (-3.59 to 2.08)  | 0.01 (-0.51 to 0.53)          | 0.00 (-0.05 to 0.05)       | 0.02 (-0.51 to 0.56)          |
| $\geq$ 60 yr                                    | 1.38 (-11.27 to 14.02) | -0.18 (-2.53 to 2.17)         | 0.02 (-0.18 to 0.23)       | -0.16 (-2.52 to 2.19)         |
| Sex                                             |                        |                               |                            |                               |
| Men                                             | 1.29 (-2.81 to 5.39)   | 0.22 (-0.64 to 1.07)          | 0.00 (-0.07 to 0.07)       | 0.24 (-0.63 to 1.12)          |
| Women                                           | -1.97 (-5.69 to 1.75)  | -0.06 (-0.57 to 0.45)         | 0.01 (-0.04 to 0.07)       | -0.07 (-0.59 to 0.45)         |
| Race                                            |                        |                               |                            |                               |
| Aboriginal                                      | -2.41 (-9.48 to 4.66)  | 0.81 (-0.36 to 1.99)          | 0.04 (-0.12 to 0.20)       | 0.77 (-0.43 to 1.97)          |
| Chinese                                         | 0.89 (-4.67 to 6.45)   | <b>1.12 (0.21 to 2.03)</b>    | <b>0.08 (0.00 to 0.16)</b> | <b>1.21 (0.30 to 2.12)</b>    |
| European                                        | -2.80 (-7.97 to 2.37)  | <b>-1.86 (-3.06 to -0.65)</b> | -0.10 (-0.19 to 0.00)      | <b>-1.92 (-3.16 to -0.68)</b> |
| South Asian                                     | 1.18 (-5.44 to 7.79)   | 0.29 (-0.53 to 1.12)          | 0.02 (-0.07 to 0.1)        | 0.32 (-0.54 to 1.17)          |
| Annual household income                         |                        |                               |                            |                               |
| < \$30,000                                      | -1.67 (-7.78 to 4.44)  | -0.07 (-0.98 to 0.85)         | 0.04 (-0.04 to 0.12)       | -0.10 (-1.04 to 0.84)         |
| \$30,000 to \$60,000                            | -2.86 (-6.84 to 1.11)  | -0.20 (-0.84 to 0.44)         | -0.01 (-0.08 to 0.06)      | -0.19 (-0.84 to 0.45)         |
| $\geq$ \$60,000                                 | 1.99 (-3.39 to 7.37)   | 0.61 (-0.48 to 1.7)           | 0.00 (-0.08 to 0.09)       | 0.65 (-0.47 to 1.77)          |
| Education                                       |                        |                               |                            |                               |
| $\leq$ High school                              | 2.57 (-3.05 to 8.20)   | <b>-1.01 (-1.91 to -0.11)</b> | -0.05 (-0.13 to 0.04)      | <b>-0.92 (-1.82 to -0.02)</b> |
| > High school                                   | -1.60 (-4.81 to 1.61)  | 0.49 (-0.12 to 1.10)          | 0.02 (-0.03 to 0.07)       | 0.46 (-0.17 to 1.09)          |
| Obesity (BMI $\geq$ 30 $\text{kg}/\text{m}^2$ ) |                        |                               |                            |                               |
| No                                              | -1.24 (-4.34 to 1.85)  | -0.05 (-0.60 to 0.49)         | 0.01 (-0.04 to 0.06)       | -0.04 (-0.60 to 0.51)         |
| Yes                                             | 1.81 (-4.94 to 8.56)   | 0.60 (-0.81 to 2.00)          | 0.05 (-0.06 to 0.17)       | 0.64 (-0.80 to 2.07)          |
| Smoke status                                    |                        |                               |                            |                               |
| Current                                         | -9.58 (-26.66 to 7.50) | -1.20 (-4.94 to 2.54)         | -0.09 (-0.45 to 0.28)      | -1.41 (-5.29 to 2.47)         |
| Former                                          | -1.92 (-7.89 to 4.05)  | -0.52 (-1.60 to 0.55)         | -0.01 (-0.11 to 0.09)      | -0.56 (-1.66 to 0.54)         |
| Never                                           | 0.30 (-3.14 to 3.73)   | 0.24 (-0.38 to 0.86)          | 0.00 (-0.06 to 0.05)       | 0.27 (-0.36 to 0.90)          |

<sup>a</sup>Stratified by each covariate, adjusted for all other covariates in the table, and also age, BMI, physical activity, systolic blood pressure, LDL-C, HDL-C, neighborhood income levels, and neighborhood education levels.

## REFERENCES

- 1 Brook RD, Rajagopalan S, Pope CA, 3rd et al. Particulate matter air pollution and cardiovascular disease: An update to the scientific statement from the American Heart Association. *Circulation* 2010;121:2331-78.
- 2 Lusis AJ. Atherosclerosis. *Nature* 2000;407:233-41.
- 3 Libby P, Theroux P. Pathophysiology of coronary artery disease. *Circulation* 2005;111:3481-8.
- 4 Ross R. The pathogenesis of atherosclerosis: a perspective for the 1990s. *Nature* 1993;362:801-9.
- 5 Chambless LE, Heiss G, Folsom AR et al. Association of coronary heart disease incidence with carotid arterial wall thickness and major risk factors: the Atherosclerosis Risk in Communities (ARIC) Study, 1987-1993. *Am J Epidemiol* 1997;146:483-94.
- 6 Stein JH, Korcarz CE, Hurst RT et al. Use of carotid ultrasound to identify subclinical vascular disease and evaluate cardiovascular disease risk: a consensus statement from the American Society of Echocardiography Carotid Intima-Media Thickness Task Force. Endorsed by the Society for Vascular Medicine. *J Am Soc Echocardiogr* 2008;21:93-111; quiz 189-90.
- 7 Chambless LE, Folsom AR, Clegg LX et al. Carotid wall thickness is predictive of incident clinical stroke: the Atherosclerosis Risk in Communities (ARIC) study. *Am J Epidemiol* 2000;151:478-87.
- 8 Kunzli N, Perez L, von Klot S et al. Investigating air pollution and atherosclerosis in humans: concepts and outlook. *Prog Cardiovasc Dis* 2011;53:334-43.
- 9 Sun Q, Wang A, Jin X et al. Long-term air pollution exposure and acceleration of atherosclerosis and vascular inflammation in an animal model. *JAMA* 2005;294:3003-10.
- 10 Suwa T, Hogg JC, Quinlan KB, Ohgami A, Vincent R, van Eeden SF. Particulate air pollution induces progression of atherosclerosis. *J Am Coll Cardiol* 2002;39:935-42.
- 11 Kunzli N, Jerrett M, Mack WJ et al. Ambient air pollution and atherosclerosis in Los Angeles. *Environ Health Perspect* 2005;113:201-6.
- 12 Diez Roux AV, Auchincloss AH, Franklin TG et al. Long-term exposure to ambient particulate matter and prevalence of subclinical atherosclerosis in the Multi-Ethnic Study of Atherosclerosis. *Am J Epidemiol* 2008;167:667-75.
- 13 Allen RW, Criqui MH, Diez Roux AV et al. Fine particulate matter air pollution, proximity to traffic, and aortic atherosclerosis. *Epidemiology* 2009;20:254-64.
- 14 Hoffmann B, Moebus S, Mohlenkamp S et al. Residential exposure to traffic is associated with coronary atherosclerosis. *Circulation* 2007;116:489-96.
- 15 Bauer M, Moebus S, Mohlenkamp S et al. Urban particulate matter air pollution is associated with subclinical atherosclerosis: results from the HNR (Heinz Nixdorf Recall) study. *J Am Coll Cardiol* 2010;56:1803-8.
- 16 Adar SD, Sheppard L, Vedal S et al. Fine particulate air pollution and the progression of carotid intima-medial thickness: a prospective cohort study from the multi-ethnic study of atherosclerosis and air pollution. *PLoS Med* 2013;10:e1001430.
- 17 Kunzli N, Jerrett M, Garcia-Esteban R et al. Ambient air pollution and the progression of atherosclerosis in adults. *PLoS One* 2010;5:e9096.

- 1  
2  
3 18 Brook RD, Franklin B, Cascio W et al. Air pollution and cardiovascular disease: a  
4 statement for healthcare professionals from the Expert Panel on Population and  
5 Prevention Science of the American Heart Association. *Circulation* 2004;109:2655-71.  
6  
7 19 Health Effects Institute. Traffic-Related Air Pollution. A Critical Review of the Literature  
8 on Emissions, Exposure, and Health Effects 2010.  
9  
10 20 Zhu Y, Hinds WC, Kim S, Sioutas C. Concentration and size distribution of ultrafine  
11 particles near a major highway. *J Air Waste Manag Assoc* 2002;52:1032-42.  
12  
13 21 Zhou Y, Levy JI. Factors influencing the spatial extent of mobile source air pollution  
14 impacts: a meta-analysis. *Bmc Public Health* 2007;7:89.  
15  
16 22 Jerrett M, Arain A, Kanaroglou P et al. A review and evaluation of intraurban air  
17 pollution exposure models. *J Expo Anal Environ Epidemiol* 2005;15:185-204.  
18  
19 23 Gan WQ, Tamburic L, Davies HW, Demers PA, Koehoorn M, Brauer M. Changes in  
20 residential proximity to road traffic and the risk of death from coronary heart disease.  
21 *Epidemiology* 2010;21:642-9.  
22  
23 24 Gan WQ, Koehoorn M, Davies HW, Demers PA, Tamburic L, Brauer M. Long-term  
24 exposure to traffic-related air pollution and the risk of coronary heart disease  
25 hospitalization and mortality. *Environ Health Perspect* 2011;119:501-7.  
26  
27 25 Gan WQ, Davies HW, Koehoorn M, Brauer M. Association of long-term exposure to  
28 community noise and traffic-related air pollution with coronary heart disease mortality.  
29 *Am J Epidemiol* 2012;175:898-906.  
30  
31 26 Lear SA, Birmingham CL, Chockalingam A, Humphries KH. Study design of the  
32 Multicultural Community Health Assessment Trial (M-CHAT): a comparison of body fat  
33 distribution in four distinct populations. *Ethn Dis* 2006;16:96-100.  
34  
35 27 Lear SA, Humphries KH, Kohli S, Frohlich JJ, Birmingham CL, Mancini GB. Visceral  
36 adipose tissue, a potential risk factor for carotid atherosclerosis: results of the  
37 Multicultural Community Health Assessment Trial (M-CHAT). *Stroke* 2007;38:2422-9.  
38  
39 28 Brauer M, Hystad P, Reynolds C. Environmental guidelines for urban and rural land  
40 development in British Columbia: supporting information on air quality. 2012.  
41  
42 29 Henderson SB, Beckerman B, Jerrett M, Brauer M. Application of land use regression to  
43 estimate long-term concentrations of traffic-related nitrogen oxides and fine particulate  
44 matter. *Environ Sci Technol* 2007;41:2422-8.  
45  
46 30 Larson T, Henderson SB, Brauer M. Mobile Monitoring of Particle Light Absorption  
47 Coefficient in an Urban Area as a Basis for Land Use Regression. *Environmental Science  
& Technology* 2009;43:4672-4678.  
48  
49 31 Brauer M, Lencar C, Tamburic L, Koehoorn M, Demers P, Karr C. A cohort study of  
50 traffic-related air pollution impacts on birth outcomes. *Environ Health Perspect*  
51 2008;116:680-6.  
52  
53 32 Wang RR, Henderson SB, Sbihi H, Allen RW, Brauer M. Temporal stability of land use  
54 regression models for traffic-related air pollution. *Atmospheric Environment*  
55 2013;64:312-319.  
56  
57 33 Aminbakhsh A, Frohlich J, Mancini GB. Detection of early atherosclerosis with B mode  
58 carotid ultrasonography: assessment of a new quantitative approach. *Clin Invest Med*  
59 1999;22:265-74.  
60

- 1  
2  
3 34 Chan SY, Mancini GB, Kuramoto L, Schulzer M, Frohlich J, Ignaszewski A. The  
4 prognostic importance of endothelial dysfunction and carotid atheroma burden in patients  
5 with coronary artery disease. *J Am Coll Cardiol* 2003;42:1037-43.  
6  
7 35 Gan WQ, McLean K, Brauer M, Chiarello SA, Davies HW. Modeling population  
8 exposure to community noise and air pollution in a large metropolitan area. *Environ Res*  
9 2012;116:11-6.  
10  
11 36 Wilker EH, Mittleman MA, Coull BA et al. Long-term Exposure to Black Carbon and  
12 Carotid Intima-Media Thickness: The Normative Aging Study. *Environ Health Perspect*  
13 2013;121:1061-7.  
14  
15 37 Painschab MS, Davila-Roman VG, Gilman RH et al. Chronic exposure to biomass fuel is  
16 associated with increased carotid artery intima-media thickness and a higher prevalence of  
17 atherosclerotic plaque. *Heart* 2013;99:984-91.  
18  
19 38 Rivera M, Basagana X, Aguilera I et al. Association between long-term exposure to  
20 traffic-related air pollution and subclinical atherosclerosis: the REGICOR study. *Environ*  
21 *Health Perspect* 2013;121:223-30.  
22  
23 39 Sun M, Kaufman JD, Kim SY et al. Particulate matter components and subclinical  
24 atherosclerosis: common approaches to estimating exposure in a Multi-Ethnic Study of  
25 Atherosclerosis cross-sectional study. *Environ Health* 2013;12:39.  
26  
27 40 Bonner MR, Han D, Nie J, Rogerson P, Vena JE, Freudenheim JL. Positional accuracy of  
28 geocoded addresses in epidemiologic research. *Epidemiology* 2003;14:408-12.  
29  
30 41 Xie SD, Zhang YH, Li Q, Tang XY. Spatial distribution of traffic-related pollutant  
31 concentrations in street canyons. *Atmospheric Environment* 2003;37:3213-3224.  
32  
33 42 Restrepo C, Zimmerman R, Thurston G et al. A comparison of ground-level air quality  
34 data with New York State Department of Environmental Conservation monitoring  
35 stations data in South Bronx, New York. *Atmospheric Environment* 2004;38:5295-5304.  
36  
37 43 Hystad PU, Setton EM, Allen RW, Keller PC, Brauer M. Modeling residential fine  
38 particulate matter infiltration for exposure assessment. *J Expo Sci Environ Epidemiol*  
39 2009;19:570-9.  
40  
41 44 Janssen NA, Hoek G, Brunekreef B, Harssema H, Mensink I, Zuidhof A. Personal  
42 sampling of particles in adults: relation among personal, indoor, and outdoor air  
43 concentrations. *Am J Epidemiol* 1998;147:537-47.  
44  
45 45 Nethery E, Leckie SE, Teschke K, Brauer M. From measures to models: an evaluation of  
46 air pollution exposure assessment for epidemiological studies of pregnant women. *Occup*  
47 *Environ Med* 2008;65:579-86.  
48  
49 46 Shanmugam N, Roman-Rego A, Ong P, Kaski JC. Atherosclerotic plaque regression: fact  
50 or fiction? *Cardiovasc Drugs Ther* 2010;24:311-7.  
51  
52  
53  
54  
55  
56  
57  
58  
59  
60

# Long-Term Exposure to Traffic-Related Air Pollution and Progression of Carotid Artery Atherosclerosis

Wen Qi Gan,<sup>1,2</sup> Ryan W. Allen,<sup>3</sup> Michael Brauer,<sup>4</sup>  
Hugh W. Davies,<sup>4</sup> G.B. John Mancini,<sup>5,6</sup> Scott A. Lear<sup>3,7,8</sup>

<sup>1</sup>Department of Population Health, Hofstra North Shore-LIJ School of Medicine, Great Neck, New York

<sup>2</sup>Feinstein Institute for Medical Research, North Shore-Long Island Jewish Health System, Great Neck, New York

<sup>3</sup>Faculty of Health Sciences, Simon Fraser University, Burnaby, British Columbia, Canada

<sup>4</sup>School of Population and Public Health, University of British Columbia, Vancouver, British Columbia, Canada

<sup>5</sup>Healthy Heart Program, St. Paul Hospital, Providence Healthcare, Vancouver, British Columbia, Canada

<sup>6</sup>Faculty of Medicine, Division of Cardiology, University of British Columbia, Vancouver, British Columbia, Canada

<sup>7</sup>Department of Biomedical Physiology and Kinesiology, Simon Fraser University, Burnaby, British Columbia, Canada

<sup>8</sup>Division of Cardiology, Providence Health Care, Vancouver, Canada

## Correspondence to:

Wen Qi Gan, MD PhD  
175 Community Drive, Room 235  
Great Neck, NY 11021  
Phone: 516-465-3053  
Fax: 516-465-2699  
E-mail: [wgan@nshs.edu](mailto:wgan@nshs.edu)

**Key Words:** air pollution, atherosclerosis, cohort studies, vehicle emissions

**Word Count (text): 4,104**

## ABSTRACT

**Background:** Epidemiologic studies have demonstrated associations between long-term exposure to traffic-related air pollution and coronary heart disease (CHD). Atherosclerosis is the principal pathological process responsible for CHD events, but effects of traffic-related air pollution on progression of atherosclerosis are not clear.

**Objectives:** To investigate associations between long-term exposure to traffic-related air pollution and progression of carotid artery atherosclerosis.

**Methods:** Healthy participants aged 30-65 years were recruited in Vancouver, Canada, and followed for approximately 5 years (N = 509). At baseline and end of follow-up, participants underwent carotid artery ultrasound examinations to assess atherosclerosis severity, including carotid intima-media thickness, plaque area, plaque number, and total area. Annual change of each atherosclerosis marker during the follow-up period was calculated as the difference between these two measurements divided by years of follow-up. Living close to major roads was defined as  $\leq 150$  meters from a highway or  $\leq 50$  meters from a major road. Residential exposures to traffic-related air pollutants were estimated using high-resolution land use regression models. The data were analyzed using covariate-adjusted general linear models.

**Results:** At baseline, there were no significant differences in any atherosclerosis markers between participants living close to and those living away from major roads. After follow-up, the differences in annual changes of these markers between these two groups were small and not statistically significant. Also, no significant associations were observed with concentrations of traffic-related air pollutants including black carbon, fine particles, nitrogen dioxide, and nitric oxide.

1  
2  
3 **Conclusions:** This study did not find significant associations between traffic-related air pollution  
4 and progression of carotid artery atherosclerosis in a region with relatively low levels of air  
5 pollution. Long-term exposure to traffic-related air pollution was not significantly associated with  
6 progression of carotid artery atherosclerosis.  
7  
8  
9  
10  
11  
12  
13  
14  
15  
16

## 17 **ARTICLE SUMMARY**

### 18 **Strengths and limitations of this study**

- 19  
20  
21  
22  
23  
24  
25  
26  
27  
28  
29  
30  
31  
32  
33  
34  
35  
36  
37  
38  
39  
40  
41  
42  
43  
44  
45  
46  
47  
48  
49  
50  
51  
52  
53  
54  
55  
56
- This study utilized multiple markers, including carotid intima-media thickness, plaque area, plaque number, and total area, to assess carotid artery atherosclerosis. Exposure to traffic-related air pollution was assessed using residential proximity to major roads and spatially resolved estimates of residential exposure to black carbon, fine particles, nitrogen dioxide, and nitric oxide.
  - This study simultaneously investigated cross-sectional and longitudinal associations between exposure to traffic-related air pollution and carotid artery atherosclerosis in a large metropolitan area with relatively low levels of air pollution.
  - Compared with previous longitudinal studies, this study has a relatively long follow-up period (median 5.4 years, range 3.7–7.2 years).
  - Small sample size, moderate progression of atherosclerosis in the study sample, along with lower levels of ambient air pollution in the study region might limit our ability to detect presumably small effects of air pollution on progression of carotid artery atherosclerosis in this study.



## INTRODUCTION

Convincing epidemiologic evidence has demonstrated that long-term exposure to ambient air pollution is associated with cardiovascular disease, especially coronary heart disease (CHD), morbidity and mortality.<sup>1</sup> Although the biologic mechanisms underlying the associations are not fully understood, it is well known that atherosclerosis is the principal pathological process responsible for chronic and acute CHD events.<sup>2-4</sup> Atherosclerosis is a chronic condition characterized by a progressive buildup of plaques in the large arteries, which may cause chronic ischemia due to insufficient blood supply and acute cardiac events due to plaques rupture and blood clot.<sup>2,3</sup> Epidemiologic studies have shown that severity of atherosclerosis measured by carotid intima-media thickness (CIMT) is able to predict future cardiovascular risk (e.g., CHD and stroke) for people without cardiovascular diseases.<sup>5-7</sup>

It has been hypothesized that particulate air pollution is associated with cardiovascular outcomes through two major pathways: promoting atherosclerosis progression and triggering acute cardiac events in individuals with severe atherosclerosis, especially vulnerable plaques.<sup>3,8</sup> Short-term exposure studies have provided sufficient evidence to support acute triggering effects of particulate air pollution.<sup>1</sup> Long-term exposure studies based on clinical outcomes presumably integrate both atherosclerosis progression and acute triggering effects, and thus have greater effect sizes than short-term exposure studies. However, these studies are unable to distinguish these two different adverse effects of particulate air pollution.<sup>1,8</sup> Evidence is needed to determine the role of particulate air pollution on progression of atherosclerosis.<sup>8</sup>

Experimental studies in animals with risk factors for atherosclerosis have provided some evidence that exposure to particulate air pollution is associated with accelerated progression of atherosclerosis.<sup>9,10</sup> However, there is limited epidemiologic evidence in humans to corroborate

1  
2  
3 these findings. Several cross-sectional studies have examined associations of atherosclerosis  
4 severity with residential proximity to road traffic and exposure to fine particulate air pollution,  
5 but their findings were not fully consistent.<sup>11-15</sup> Two recent longitudinal studies conducted in the  
6 United States have provided limited evidence to support an association between particulate air  
7 pollution and progression of atherosclerosis.<sup>16 17</sup> As suggested by Kunzli and colleagues,<sup>8</sup> it is  
8 necessary to further investigate the relationship between long-term air pollution exposure and  
9 progression of atherosclerosis.  
10  
11  
12  
13  
14  
15  
16  
17  
18

19  
20 Air pollution is a complex mixture of particles, gases, and liquids, mainly derived from  
21 the combustion of fossil fuels.<sup>18</sup> In metropolitan areas, road traffic is a major source of ambient  
22 air pollution, and produces strong spatial gradients in pollution concentrations.<sup>19</sup> It has been  
23 demonstrated that the concentrations of traffic-related air pollutants decrease exponentially from  
24 major roadways and approach background concentrations within about 150 meters.<sup>20 21</sup> Therefore,  
25 the distance from each person's residence to a major roadway may be used as a convenient  
26 surrogate for exposure to traffic-related air pollution.<sup>22</sup> We have previously demonstrated in a  
27 large population-based cohort study conducted in metropolitan Vancouver, Canada, that  
28 residential proximity to road traffic and traffic-related fine particulate air pollution (black carbon)  
29 were associated with increased risk of CHD hospitalization and mortality.<sup>23-25</sup>  
30  
31  
32  
33  
34  
35  
36  
37  
38  
39  
40  
41  
42

43  
44 Based on the previous studies, we used a longitudinal study design to investigate the  
45 associations between progression of carotid artery atherosclerosis and long-term exposure to  
46 traffic-related air pollution, indicated by residential proximity to major roads and residential  
47 concentrations of four major traffic-related air pollutants including black carbon, particulate  
48 matter < 2.5 µm in aerodynamic diameter (PM<sub>2.5</sub>), nitrogen dioxide (NO<sub>2</sub>), and nitric oxide (NO),  
49 in metropolitan Vancouver.  
50  
51  
52  
53  
54  
55  
56

## MATERIALS AND METHODS

### Participants and Study Design

The current study was based on the Multicultural Community Health Assessment Trial (M-CHAT), which was designed to compare body fat distribution in different ethnic groups. The M-CHAT study design has been described in detail elsewhere.<sup>26 27</sup> During 2004-2005, 829 apparently healthy participants volunteers aged 30-65 years and matched for body mass index (BMI) and ethnicity (Aboriginal, Chinese, European, and South Asian) were recruited in metropolitan Vancouver. During recruitment, individuals with the following characteristics were excluded: (1) having a prior diagnosis of cardiovascular disease or significant comorbidity such as diabetes or hypertension; (2) taking medications that affect cardiovascular risk factors such as lipid-lowering, antihypertensive, or hypoglycemic medications; (3) experiencing recent weight change more than 2.2 kg within recent three months; and (4) having significant prosthetics or amputations.

The participants were followed for approximately five years. Each participant underwent carotid artery ultrasound examinations to assess severity of atherosclerosis at baseline (2004-2005) and the end of follow-up (2009-2011). Residential proximity to major roads and exposures to traffic-related air pollutants were estimated based on participants' residential addresses at baseline. Various potential confounding factors were collected through standard questionnaires that were administered by trained interviewers. General linear models were used to examine cross-sectional and longitudinal associations of carotid artery atherosclerosis with residential traffic proximity and four major traffic-related air pollutants after adjustment for various potential confounding factors including residential exposure to community noise. The study protocol was

1  
2  
3 approved by the Simon Fraser University Research Ethics Board, and all participants provided  
4  
5 informed consent.  
6  
7  
8  
9

## 10 **Exposure Assessment**

### 11 *Residential Proximity to Major Roads*

12  
13 Residential proximity to major roads was estimated based on participants' geocoded  
14  
15 baseline residential addresses using a geographic information system (GIS). In DMTI ArcView  
16  
17 street file dataset for British Columbia (Canmap Streetfiles, version 2006.3; DMTI Spatial,  
18  
19 Markham, Ontario, Canada), road types in the study region were divided into two categories:  
20  
21 highway (DMTI type 1 and 2 roads) including expressway (average traffic counts 114,000  
22  
23 vehicles/day) and principal highway (21,000 vehicles/day), or major road (DMTI type 3 and 4  
24  
25 roads) including secondary highway (18,000 vehicles/day) and major road (15,000 vehicles/day).  
26  
27 Based on the differences in traffic volumes between highways and major roads,<sup>28</sup> and the  
28  
29 previous findings that the concentrations of traffic-related air pollutants decrease exponentially  
30  
31 from major roads and approach background concentrations within about 150 meters,<sup>20 21</sup>  
32  
33 participants in the current study were divided into two groups: those living close to major roads,  
34  
35 defined as  $\leq 150$  meters from a highway or  $\leq 50$  meters from a major road; and those living away  
36  
37 from major roads.  
38  
39  
40  
41  
42  
43  
44  
45  
46  
47

### 48 *Air Pollution Exposure Assessment*

49  
50 The air pollution exposure assessment has been described in detail elsewhere.<sup>29-31</sup> High-  
51  
52 resolution (10 meters) land-use regression (LUR) models were developed in the study region to  
53  
54 estimate annual average concentrations for four major traffic-related air pollutants, including  
55  
56

1  
2  
3 black carbon, PM<sub>2.5</sub>, NO<sub>2</sub>, and NO. The predictors and performance of these LUR models have  
4 been discussed in detail previously.<sup>24</sup> The LUR models were developed in 2003, and we have  
5 recently shown that the spatial patterns of traffic-related air pollution in Vancouver remained  
6 stable between 2003 and 2010.<sup>32</sup> The air pollution data were assigned to participants through their  
7 baseline residential addresses to approximate individual exposure to these traffic-related air  
8 pollutants.  
9  
10  
11  
12  
13  
14  
15  
16  
17  
18  
19

### 20 Carotid Artery Atherosclerosis Assessment

21  
22 The assessment method for carotid artery atherosclerosis has been described in detail  
23 elsewhere.<sup>27 33</sup> High-resolution B-mode ultrasonography equipped with a 10-MHz linear array  
24 transducer was used. A uniform length of 10 mm in the far wall of the common carotid artery  
25 within 2 cm proximal to the carotid bulb was selected for manual measurement of intima-media  
26 thickness (IMT). In the selected area, the largest IMT without focal lesions was measured; the  
27 average of the largest IMT in the left and right carotid arteries was calculated as a person's  
28 carotid IMT (CIMT). A plaque was defined as any focal protrusion above the surrounding intima;  
29 plaque number was counted in each carotid segment including common, internal, external carotid  
30 arteries, and carotid bulb for two carotid arteries. The area of a single plaque was calculated as  
31 the average lesion thickness (mm) multiplied by the lesion length (mm); and plaque area was  
32 calculated as the sum of the area for each plaque (mm<sup>2</sup>). Total area (mm<sup>2</sup>) was calculated as the  
33 sum of plaque area and IMT area measured in the left and right carotid arteries; IMT area (mm<sup>2</sup>)  
34 was calculated as the average IMT (mm) multiplied by the length (20 mm) over which the IMT  
35 was measured. These four atherosclerosis markers were included as outcome variables in the  
36  
37  
38  
39  
40  
41  
42  
43  
44  
45  
46  
47  
48  
49  
50  
51  
52  
53  
54  
55  
56  
57  
58  
59  
60

1  
2  
3 current study, because they are related to cardiovascular risk factors and are able to predict future  
4  
5 cardiovascular events.<sup>5-7 33 34</sup>  
6

7  
8 To evaluate the reproducibility of the measurement, 192 randomly selected participants  
9  
10 from the cohort had the measurements repeated by different technicians. The average difference  
11  
12 between two measurements was 0.3  $\mu\text{m}$  for CIMT, 0.39  $\text{mm}^2$  for plaque area, and 0.13  $\text{mm}^2$  for  
13  
14 total area. The differences were small and not statistically significant.  
15  
16

### 17 18 19 20 **Potential Confounding Factors**

21  
22 The following were important cardiovascular risk factors and were regarded as potential  
23  
24 confounding factors in our analyses: age, sex (male, or female), ethnicity (Aboriginal, Chinese,  
25  
26 European, or South Asian), BMI, cigarette smoking status (never, former, or current smoker),  
27  
28 educational attainment ( $\leq$  high school, or  $>$ high school), annual household income ( $<$  \$30,000;  
29  
30 \$30,000 to \$60,000; or  $\geq$  \$60,000), leisure time physical activity (hours per week), systolic blood  
31  
32 pressure (SBP), diastolic blood pressure (DBP), low-density lipoprotein cholesterol (LDL-C),  
33  
34 high-density lipoprotein cholesterol (HDL-C), and total cholesterol. In the analysis for traffic-  
35  
36 related air pollutants, community noise was also treated as a potential confounding factor.<sup>25</sup>  
37  
38  
39

40  
41 The demographic and behavioral risk factors were collected through standard  
42  
43 questionnaires, which were administered by trained interviewers. Leisure time physical activity  
44  
45 was estimated based on average minutes each week spent in physical activity during the previous  
46  
47 year. Blood pressure was measured using an automated oscillometric office blood pressure  
48  
49 monitor (VSM MedTech Ltd, Coquitlam, Canada). After 10 minutes of seated rest, five  
50  
51 successive measurements were recorded; average SBP and DBP were calculated by averaging  
52  
53 these five readings. Meanwhile, fasting blood samples were collected to measure LDL-C, HDL-C,  
54  
55  
56

1  
2  
3 and total cholesterol using standard enzymatic procedures in the same clinical laboratory.<sup>27</sup>

4  
5 Residential exposure to community noise (annual day-evening-night A-weighted equivalent  
6  
7 continuous noise levels,  $L_{den}$  dB(A)) was estimated based on baseline residential addresses and  
8  
9 surrounding transportation information including road width, speed limits, traffic volume, and  
10  
11 fleet composition.<sup>35</sup>

12  
13  
14  
15 Neighborhood socioeconomic status was assessed using neighborhood income quintiles  
16  
17 and neighborhood education quintiles derived from the 2006 Statistics Canada Census data.  
18  
19  
20 Neighborhood income quintiles were calculated using the medians of household income in the  
21  
22 dissemination areas of the study region. Neighborhood education quintiles were calculated using  
23  
24 the percentages of people with certificate, diploma, or degree in the dissemination areas of the  
25  
26 study region.<sup>23</sup>

## 27 28 29 30 31 **Statistical Analyses**

32  
33  
34 Baseline characteristics of participants were compared between the group living close to  
35  
36 and the group living away from major roads using a Chi-squared test for categorical variables,  
37  
38 two-sample t-test for normally distributed continuous variables, and Wilcoxon two-sample test  
39  
40 for skewed continuous variables. Correlations between pollutants were examined using  
41  
42 Spearman's rank correlation analysis.

43  
44  
45  
46 General linear models were used to compare carotid atherosclerosis levels between these  
47  
48 two groups. Annual change for each atherosclerosis marker during the follow-up period was  
49  
50 calculated as the difference between these two measurements (end of follow-up minus baseline)  
51  
52 divided by the number of years of follow-up. Adjusted differences of atherosclerosis levels  
53  
54 between these two groups were calculated using the group living away from major roads as the  
55  
56

1  
2  
3 reference category. In addition, we performed two sensitivity analyses for progression of  
4  
5 atherosclerosis. First, we repeated the above analyses for participants with increased severity of  
6  
7 atherosclerosis indicated by each atherosclerosis marker (annual change > 0). Second, we used  
8  
9 the 85th percentile of annual change of each atherosclerosis marker as the cutoff point to identify  
10  
11 participants with greater progression of atherosclerosis (events). The Cox proportional hazard  
12  
13 models were used to calculate relative risks of having greater progression of atherosclerosis for  
14  
15 participants living close to major roads compared with those living away from major roads. In the  
16  
17 Cox models, person-years were calculated for each participant from the date of baseline  
18  
19 examination to the date of follow-up examination.  
20  
21  
22  
23

24  
25 To examine independent associations between residential traffic proximity and carotid  
26  
27 artery atherosclerosis, statistical analyses were performed to control for various potential  
28  
29 confounding variables through four models: model 1 was a crude unadjusted model; model 2 was  
30  
31 adjusted for age (continuous), sex, and ethnicity; model 3 was further adjusted for BMI  
32  
33 (continuous), smoking status, leisure time physical activity (continuous), educational attainment,  
34  
35 and annual household income in addition to the covariates included in model 2; model 4 was  
36  
37 further adjusted for SBP (continuous), LDL-C (continuous), HDL-C (continuous), neighborhood  
38  
39 income quintiles, and neighborhood education quintiles in addition to the covariates included in  
40  
41 model 3. In the analyses for the associations between traffic-related air pollutants and progression  
42  
43 of carotid artery atherosclerosis, we calculated differences of annual changes for each  
44  
45 atherosclerosis marker in relation to an interquartile range elevation in each traffic-related air  
46  
47 pollutant after adjustment for community noise and those covariates included in model 4.  
48  
49  
50  
51

52  
53 All statistical tests were 2-sided and were performed using SAS, version 9.3 (SAS  
54  
55 Institute Inc., Cary, NC, USA).  
56



## RESULTS

A total of 829 participants were recruited at baseline. 13 individuals did not perform the carotid ultrasound examination, and 56 individuals did not provide accurate residential addresses and thus could not be geocoded; these individuals were excluded, leaving 760 participants (92% of those recruited) with complete data at baseline. Among these participants, 509 completed the follow-up, with a follow-up rate of 67%, median follow-up time of 5.4 years (range 3.7–7.2 years). Compared with those lost to follow-up, participants who completed follow-up had higher socioeconomic status (e.g., better education, higher annual household income) and better health profiles (e.g., more never smokers, lower BMI and waist circumference); however, there were no significant differences between the two groups in the baseline carotid artery atherosclerosis (see table 1 and table 2 in the Online Appendix).

Baseline annual average concentrations of traffic-related air pollutants and annual average levels of community noise are summarized in table 1. Overall, air pollution and community noise levels were not strongly correlated; also, air pollutants were not strongly correlated with each other, with the exception of NO and NO<sub>2</sub> (table 1). These results are consistent with those of our previous studies performed in the study region.

At baseline, 117 (23%) participants lived close to major roads. As expected, compared with those living away from major roads, participants living close to major roads were exposed to higher levels of traffic-related air pollutants and community noise (table 1); furthermore, these participants had lower annual household income, were more likely to be Aboriginal and less likely to be of South Asian origin. There were no substantial differences between these two groups with respect to age, sex, education, BMI, smoking status, alcohol intake, physical activity, blood pressure, and blood lipids (table 2).

1  
2  
3 At baseline, compared with those living away from major roads, participants living close  
4 to major roads had similar levels of carotid atherosclerosis measured by CIMT, plaque area,  
5 plaque number, and total area. After adjustment for various potential confounding factors in  
6 models 2-4, there were no significant differences between these two groups in these  
7 atherosclerosis markers (table 3).  
8  
9

10  
11  
12  
13  
14  
15 After five years of follow-up, atherosclerosis levels were increased for most participants  
16 (see etable 3 in the Online Appendix). Overall, the mean values of annual changes for these  
17 atherosclerosis markers were similar between these two groups; the differences in annual changes  
18 of these markers between these two groups were small and not statistically significant after  
19 adjustment for various potential confounding factors in models 2-4 (table 4). When the analyses  
20 were repeated for participants with increased atherosclerosis indicated by each single marker, the  
21 results were similar to those presented in table 4 (see etable 4 in the Online Appendix); when the  
22 85th percentile of annual change of each marker was used to identify participants with greater  
23 progression, the risk of having greater progression was not significantly different between these  
24 two groups (see etable 5 in the Online Appendix). Similarly, there were no significant  
25 associations between annual changes in these atherosclerosis markers and traffic-related air  
26 pollutants, including black carbon, PM<sub>2.5</sub>, NO<sub>2</sub>, and NO, after adjustment for various potential  
27 confounding factors including residential exposure to community noise (table 5). There were no  
28 substantial differences between the results from the final models with and without community  
29 noise.  
30  
31  
32  
33  
34  
35  
36  
37  
38  
39  
40  
41  
42  
43  
44  
45  
46  
47  
48  
49

50 The stratified analyses show that atherosclerosis effects associated with exposure to road  
51 traffic are stronger for participants with the following characteristics: male, Chinese and South  
52 Asian background, higher family income, obesity, and never smokers (table 6). The results for  
53  
54  
55  
56  
57  
58  
59  
60

1  
2  
3 some strata (e.g. age  $\geq$  60 years) are not completely consistent across different atherosclerosis  
4  
5 markers.  
6  
7  
8  
9

## 10 DISCUSSION

11  
12 In this longitudinal study with over five years of follow-up, we did not find significant  
13  
14 associations between residential exposure to traffic-related air pollution and carotid artery  
15  
16 atherosclerosis in either cross-sectional or longitudinal analyses. Our results were largely  
17  
18 consistent for various markers of carotid artery atherosclerosis including CIMT, plaque area,  
19  
20 plaque number, and total area and for various traffic exposure indicators including residential  
21  
22 traffic proximity, black carbon, PM<sub>2.5</sub>, NO<sub>2</sub>, and NO. This study has several strengths including  
23  
24 its longitudinal study design, the relatively long follow-up period, multiple markers of carotid  
25  
26 artery atherosclerosis, various traffic exposure indicators, and control for various potential  
27  
28 confounding factors in the statistical analyses.  
29  
30  
31  
32  
33

34 As measurement error in the ultrasound examination of carotid atherosclerosis might have  
35  
36 prevented detection of very subtle effects of air pollution on carotid atherosclerosis, we  
37  
38 performed two sensitivity analyses by restricting analyses to participants with increased  
39  
40 atherosclerosis and by using the 85th percentile of annual change of each marker to identify  
41  
42 participants with greater progression of atherosclerosis. The results of these sensitivity analyses  
43  
44 are similar to those observed in the main analyses, suggesting that the null associations were less  
45  
46 likely due to measurement error in atherosclerosis assessment. For those covariates included in  
47  
48 the final models, age, sex, race, and LDL-C levels were each significantly associated with  
49  
50 progression of carotid artery atherosclerosis indicated by plaque area, plaque number, and total  
51  
52  
53  
54  
55  
56  
57  
58  
59  
60

1  
2  
3 area, but not by CIMT ( $P > 0.05$  for all covariates). We did not find significant associations of  
4  
5 carotid artery atherosclerosis with BMI, smoking, physical activity, or blood pressure.  
6  
7

8 Compared with the two recent longitudinal studies (see table 6 in the Online Appendix)  
9  
10 by Adar *et al*<sup>16</sup> and Kunzli *et al*,<sup>17</sup> our study is different in the following four aspects: (1) on  
11  
12 average, our participants were more than 10 years younger (baseline mean age 47 years versus 62  
13  
14 and 59 years); (2) the study region had relatively low levels of ambient PM<sub>2.5</sub> (baseline annual  
15  
16 mean concentration 4.1 µg/m<sup>3</sup> versus 16.6 and 27.8 µg/m<sup>3</sup>); (3) our participants did not have  
17  
18 cardiovascular disease and comorbid conditions such as diabetes and hypertension at baseline;  
19  
20 and (4) the current study took into account the potential influences of community noise on the  
21  
22 associations between traffic-related air pollutants and progression of carotid artery atherosclerosis.  
23  
24 These differences may partly explain the null associations in our study. Overall, our baseline  
25  
26 CIMT ( $673 \pm 122$  µm) and annual change in CIMT ( $9.2 \pm 12.1$  µm/yr) were comparable with  
27  
28 those by Adar *et al* ( $678 \pm 189$  µm,  $14.0 \pm 53.0$  µm/yr),<sup>16</sup> but were quite different from those of  
29  
30 Kunzli *et al* ( $780 \pm 150$  µm,  $2.0 \pm 12.9$  µm/yr),<sup>17</sup> perhaps because the former is based upon a  
31  
32 multi-ethnic sample, similar to our study; whereas the latter was based on the data from five  
33  
34 clinical trials in which the interventions might have played a role in reducing progression of  
35  
36 carotid artery atherosclerosis.  
37  
38  
39  
40  
41  
42

43 It should be noted that the findings of the two recent longitudinal studies were not entirely  
44  
45 consistent.<sup>16 17</sup> Adar *et al* found that a 2.5 µg/m<sup>3</sup> increase in PM<sub>2.5</sub> was associated with a 5.0 µm  
46  
47 (95% CI, 2.6 to 7.4 µm) annual increase in CIMT; however, the association was observed for  
48  
49 within- but not between-city contrasts.<sup>16</sup> Kunzli *et al* reported that a 10 µg/m<sup>3</sup> elevation in PM<sub>2.5</sub>  
50  
51 was associated with a non-significant 2.5 µm (95% CI, -0.3 to 5.4 µm) annual increase in CIMT;  
52  
53 however, living close to a major roadway was associated with a 5.5 µm (95% CI, 0.13-10.79 µm)  
54  
55  
56  
57  
58  
59  
60

1  
2  
3 annual increase in CIMT compared with those living away from a major roadway.<sup>17</sup> In addition,  
4  
5 the findings of previous cross-sectional studies were also not consistent. Kunzli *et al* reported a  
6  
7 positive but non-significant association between PM<sub>2.5</sub> and CIMT using the baseline data from  
8  
9 two clinical trials in Los Angeles.<sup>11</sup> Based on the MESA Air baseline data, Diez Roux *et al* found  
10  
11 that PM<sub>2.5</sub> was associated with CIMT, but no significant association was observed with coronary  
12  
13 artery calcification;<sup>12</sup> Allen *et al* found that aortic calcification was associated with PM<sub>2.5</sub> among  
14  
15 participants with long-term residence, but no significant association was observed with residential  
16  
17 traffic proximity.<sup>13</sup> Based on the baseline data from a Germany study conducted in Ruhr area,  
18  
19 Hoffmann *et al* found that traffic proximity, but not PM<sub>2.5</sub>, was associated with coronary artery  
20  
21 calcification;<sup>14</sup> whereas Bauer *et al* found that PM<sub>2.5</sub>, but not traffic proximity, was associated  
22  
23 with CIMT.<sup>15</sup> Recently, in a panel study with 380 participants, Wilker *et al* found that a 0.26  
24  
25  $\mu\text{g}/\text{m}^3$  (interquartile range) increase in black carbon concentrations was associated with a 1.1%  
26  
27 increase in CIMT (95% CI, 0.4-1.7%).<sup>36</sup> Also, several recent cross-sectional studies have  
28  
29 consistently found significant associations of CIMT with biomass fuel<sup>37</sup> and traffic-related air  
30  
31 pollution.<sup>38,39</sup> In the current study, we did not find significant associations of CIMT or other  
32  
33 markers with traffic related air pollution. The findings of these studies show that inconsistencies  
34  
35 are existent within and between different studies on the relationship between ambient air  
36  
37 pollution and severity of atherosclerosis, although these measurements (e.g., CIMT and coronary  
38  
39 artery calcification) may reflect different atherosclerotic processes.  
40  
41  
42  
43  
44  
45  
46  
47

48 There are some limitations in our study that might have potentially affected the study  
49  
50 results. Residential proximity to road traffic is a convenient but crude surrogate for residential  
51  
52 exposure to traffic-related air pollution. First, geocoding of residential addresses in a GIS might  
53  
54 have introduced positional error.<sup>40</sup> Given the sharp concentration gradients of traffic-related air  
55  
56

1  
2  
3 pollution near major roads, the positional error might have introduced some exposure  
4  
5 misclassification. Second, residential traffic proximity did not take into account environmental  
6  
7 factors that might have affected actual residential exposure such as wind direction, street  
8  
9 canyons,<sup>41</sup> housing characteristics,<sup>42</sup> and indoor infiltration of air pollutants.<sup>43</sup> Third, although  
10  
11 residential exposure is able to reasonably reflect personal exposure,<sup>44 45</sup> individual factors such as  
12  
13 time spent in home, outdoor activity, and occupational exposure might have affected actual  
14  
15 personal exposure. Fourth, our exposure assessment was based on participants' baseline  
16  
17 residential addresses, we did not have residential history information during the follow-up period.  
18  
19 Exposure misclassification might have occurred for those who changed their residences and  
20  
21 therefore their exposure status. Overall, all these factors would be expected to cause  
22  
23 nondifferential exposure misclassification, reducing our ability to uncover the true relationship  
24  
25 between traffic-related air pollution and carotid artery atherosclerosis.  
26  
27  
28  
29  
30

31  
32 Loss to follow-up was another limitation of the current study. 33% of participants were  
33  
34 lost to follow-up, leaving a relatively small sample of 509 individuals. Overall, participants who  
35  
36 completed follow-up had higher socioeconomic status and better health profiles compared with  
37  
38 those lost to follow-up. Therefore loss to follow-up, in combination with the relatively small  
39  
40 sample size, might potentially contribute to the null associations in our study. Finally, after the  
41  
42 first ultrasound examination of carotid atherosclerosis, it was possible that some participants  
43  
44 might have taken medications (e.g., statins) that were able to reduce progression of  
45  
46 atherosclerosis.<sup>46</sup> We did not have information on medication use during the follow-up period.  
47  
48 Nevertheless, as mentioned before, we did exclude persons who took relevant medications at  
49  
50 baseline. Also, this was a group of healthy people who did not have cardiovascular diseases or  
51  
52  
53  
54  
55  
56  
57  
58  
59  
60

1  
2  
3 comorbid conditions. Therefore, they were less likely to take medications such as statins during  
4  
5 the follow-up period.  
6

7  
8 Furthermore, this study has a smaller sample size compared with two recently reported  
9  
10 cohort studies.<sup>16 17</sup> It should be noted, however, that some previous studies with small sample  
11  
12 sizes are still able to detect significant associations of CIMT with black carbon (N = 380),<sup>36</sup>  
13  
14 biomass fuel (N = 266),<sup>37</sup> and residential traffic proximity (N = 777 in a subgroup).<sup>17</sup> Based on  
15  
16 these studies, it was possible for our study (N = 509) to detect a significant association between  
17  
18 traffic-related air pollution and carotid artery atherosclerosis if the association was really existent  
19  
20 in the population.  
21  
22  
23

24  
25 As previously mentioned, in a population-based cohort study conducted in the same study  
26  
27 region and using the same exposure metrics,<sup>23</sup> we found that residential proximity to road traffic  
28  
29 was associated with an increased risk of CHD mortality, whereas changes in traffic proximity  
30  
31 were associated with altered risk of coronary mortality within a relatively short period of time.  
32  
33 Moving closer to major roads was associated with increased risk, whereas moving away from  
34  
35 major roads was associated with decreased risk. These previous findings, in conjunction with the  
36  
37 null associations between traffic proximity and carotid artery atherosclerosis in the current study,  
38  
39 indicate that triggering of acute cardiac events might play an more-important role in the  
40  
41 associations between traffic-related air pollution and cardiovascular outcomes.  
42  
43  
44  
45  
46  
47

## 48 CONCLUSIONS

49  
50 In this five-year longitudinal study, we did not find significant associations between  
51  
52 residential exposure to traffic-related air pollution and progression of carotid artery  
53  
54 atherosclerosis in a region with relatively low levels of air pollution. Because the findings of  
55  
56

1  
2  
3 previous studies are not **fully consistent**, more research is needed to determine the relationship  
4  
5 between long-term exposure to traffic-related air pollution and progression of atherosclerosis.  
6  
7  
8  
9

10  
11  
12 **Contributors:** All authors contributed to the study conception and design. SAL, MB, RWA,  
13  
14 HWD, GBM contributed to the data collection. WQG analyzed the data and was responsible for  
15  
16 the accuracy of the data analysis. WQG wrote the first draft of the manuscript, all authors  
17  
18 critically revised the manuscript for important intellectual content. All authors have read and  
19  
20 approved the final version of the manuscript.  
21  
22  
23

24 **Funding:** This research received no specific grant from any funding agency in the public,  
25  
26 commercial or not-for-profit sectors.  
27  
28

29 **Competing interests:** None.  
30

31 **Ethics approval:** The study protocol was approved by the Simon Fraser University Research  
32  
33 Ethics Board, and all participants provided informed consent.  
34  
35

36 **Provenance and peer review:** Not commissioned; externally peer reviewed.  
37  
38

39 **Data sharing statement:** No additional data are available.  
40  
41  
42  
43  
44  
45  
46  
47  
48  
49  
50  
51  
52  
53  
54  
55  
56  
57  
58  
59  
60



**Table 1.** Baseline average concentrations of traffic-related air pollutants, average levels of community noise, and correlation coefficients<sup>a</sup>

| Pollutant                              | Mean (SD)<br>(close to<br>major roads) <sup>b</sup> | Mean (SD)<br>(away from<br>major roads) <sup>c</sup> | Mean (SD)   | Median | IQR       | Range     | Correlation coefficient |                   |                 |      |       |
|----------------------------------------|-----------------------------------------------------|------------------------------------------------------|-------------|--------|-----------|-----------|-------------------------|-------------------|-----------------|------|-------|
|                                        |                                                     |                                                      |             |        |           |           | BC                      | PM <sub>2.5</sub> | NO <sub>2</sub> | NO   | Noise |
| BC (10 <sup>-5</sup> /m) <sup>d</sup>  | 3.03 (1.60)                                         | 1.24 (0.71)                                          | 1.65 (1.24) | 1.08   | 0.89-1.90 | 0.0-5.00  | 1.00                    | --                | --              | --   | --    |
| PM <sub>2.5</sub> (µg/m <sup>3</sup> ) | 4.27 (1.54)                                         | 4.03 (1.42)                                          | 4.08 (1.45) | 4.09   | 3.40-4.81 | 0.0-10.00 | 0.13                    | 1.00              | --              | --   | --    |
| NO <sub>2</sub> (µg/m <sup>3</sup> )   | 19.1 (4.2)                                          | 16.6 (3.9)                                           | 17.2 (4.1)  | 16.5   | 14.6-18.7 | 7.9-30.0  | 0.38                    | 0.45              | 1.00            | --   | --    |
| NO (µg/m <sup>3</sup> )                | 39.0 (15.7)                                         | 24.1 (6.7)                                           | 27.6 (11.4) | 24.9   | 20.5-31.3 | 8.4-100.0 | 0.51                    | 0.43              | 0.73            | 1.00 | --    |
| Noise (dB(A))                          | 73.9 (6.2)                                          | 65.4 (5.3)                                           | 67.4 (6.6)  | 65.3   | 63.2-71.8 | 37.1-83.4 | 0.40                    | 0.19              | 0.28            | 0.41 | 1.00  |

Abbreviations: BC, black carbon; IQR, interquartile range; NO, nitric oxide; NO<sub>2</sub>, nitrogen dioxide; PM<sub>2.5</sub>, particulate matter < 2.5 µm in aerodynamic diameter; SD, standard deviation.

<sup>a</sup>The results are derived from all participants, unless otherwise specified.

<sup>b</sup>For participants living close to major roads.

<sup>c</sup>For participants living away from major roads.

<sup>d</sup>10<sup>-5</sup>/m black carbon ≈ 0.8 µg/m<sup>3</sup> elemental carbon.

**Table 2.** Baseline characteristics of participants stratified by traffic proximity<sup>a</sup>

| Characteristic                                  | All participants (n = 509) | Close to major roads (n = 117) | Away from major roads (n = 392) | P value <sup>b</sup> |
|-------------------------------------------------|----------------------------|--------------------------------|---------------------------------|----------------------|
| Age (year)                                      | 46.8 ± 9.0                 | 47.2 ± 9.2                     | 46.7 ± 8.9                      | 0.581                |
| Sex, male (%)                                   | 49                         | 51                             | 49                              | 0.593                |
| Race (%)                                        |                            |                                |                                 | 0.008                |
| Aboriginal                                      | 14                         | 22                             | 12                              |                      |
| Chinese                                         | 30                         | 32                             | 29                              |                      |
| European                                        | 29                         | 27                             | 30                              |                      |
| South Asian                                     | 27                         | 19                             | 29                              |                      |
| Education (%)                                   |                            |                                |                                 | 0.589                |
| ≤ High school                                   | 27                         | 29                             | 27                              |                      |
| > High school                                   | 73                         | 71                             | 73                              |                      |
| Annual household income (%)                     |                            |                                |                                 | 0.019                |
| < \$30,000                                      | 24                         | 29                             | 22                              |                      |
| \$30,000 to \$60,000                            | 37                         | 43                             | 35                              |                      |
| ≥ \$60,000                                      | 39                         | 28                             | 43                              |                      |
| Smoke status (%)                                |                            |                                |                                 | 0.357                |
| Current                                         | 7                          | 9                              | 6                               |                      |
| Former                                          | 27                         | 24                             | 28                              |                      |
| Never                                           | 66                         | 67                             | 66                              |                      |
| Alcohol intake (yes, %)                         | 32                         | 30                             | 32                              | 0.649                |
| Physical activity <sup>c</sup> (hours per week) | 3.5<br>(1.7 – 6.5)         | 2.9<br>(1.6 – 6.5)             | 1.3<br>(0.9 – 1.8)              | 0.258                |
| Body mass index (kg/m <sup>2</sup> )            | 27.2 ± 4.7                 | 27.5 ± 4.3                     | 27.1 ± 4.8                      | 0.459                |
| SBP (mmHg)                                      | 118 ± 15                   | 117 ± 14                       | 118 ± 15                        | 0.357                |
| DBP (mmHg)                                      | 77 ± 9                     | 77 ± 10                        | 77 ± 9                          | 0.826                |
| Total cholesterol (mmol/L)                      | 5.2 ± 1.0                  | 5.2 ± 1.1                      | 5.3 ± 1.0                       | 0.667                |
| LDL-C (mmol/L)                                  | 3.2 ± 0.9                  | 3.2 ± 0.9                      | 3.3 ± 0.9                       | 0.311                |
| HDL-C (mmol/L)                                  | 1.3 ± 0.4                  | 1.3 ± 0.4                      | 1.3 ± 0.4                       | 0.637                |

Abbreviations: DBP, diastolic blood pressure; HDL-C, high-density lipoprotein cholesterol; LDL-C, low-density lipoprotein cholesterol; MET, metabolic equivalent of task; SBP, systolic blood pressure.

<sup>a</sup>Data are presented as percentage for categorical variables or mean ± SD for continuous variables; unless otherwise specified.

<sup>b</sup>For comparisons between the group close to and the group away from major roads.

<sup>c</sup>Median (interquartile range).

**Table 3.** Cross-sectional mean differences (95% CIs) in baseline carotid artery atherosclerosis between the group close to and the group away from major road (the reference category)

| Atherosclerosis                | Close to major roads (n = 117) <sup>a</sup> | Away from major roads (n = 392) <sup>a</sup> | Difference <sup>bc</sup> (model 1) | Difference <sup>bc</sup> (model 2) | Difference <sup>bc</sup> (model 3) | Difference <sup>bc</sup> (model 4) |
|--------------------------------|---------------------------------------------|----------------------------------------------|------------------------------------|------------------------------------|------------------------------------|------------------------------------|
| CIMT (μm)                      | 664 ± 125                                   | 673 ± 118                                    | -9.37<br>(-35.24 to 16.49)         | -12.78<br>(-35.32 to 9.76)         | -13.76<br>(-36.17 to 8.64)         | -8.7<br>(-31.15 to 13.75)          |
| Plaque area (mm <sup>2</sup> ) | 5.37 ± 8.10                                 | 6.62 ± 11.85                                 | -1.25<br>(-3.65 to 1.14)           | -1.62<br>(-3.89 to 0.66)           | -1.45<br>(-3.74 to 0.85)           | -0.88<br>(-3.19 to 1.43)           |
| Plaque number                  | 0.83 ± 0.93                                 | 0.90 ± 1.19                                  | -0.07<br>(-0.31 to 0.18)           | -0.12<br>(-0.36 to 0.12)           | -0.11<br>(-0.35 to 0.13)           | -0.05<br>(-0.29 to 0.19)           |
| Total area (mm <sup>2</sup> )  | 18.6 ± 9.0                                  | 20.1 ± 13.0                                  | -1.45<br>(-4.08 to 1.18)           | -1.88<br>(-4.3 to 0.54)            | -1.73<br>(-4.17 to 0.71)           | -1.07<br>(-3.51 to 1.38)           |

Abbreviation: CIMT, carotid intima-media thickness.

<sup>a</sup>Data are presented as mean ± standard deviation.

<sup>b</sup>Difference of least squares means between the group close to and the group away from major roads (the group away from major roads was the reference category).

<sup>c</sup>Model 1 was a crude unadjusted model; model 2 was adjusted for age, sex, and ethnicity; model 3 was further adjusted for BMI, smoking status, physical activity, education, and annual household income; model 4 was additionally adjusted for systolic blood pressure, LDL-C, HDL-C, neighborhood income levels, and neighborhood education levels.

**Table 4.** Mean differences (95% CIs) in annual changes of carotid artery atherosclerosis between the group close to and the group away from major road (the reference category)

| Atherosclerosis                     | Close to major roads (n = 117) <sup>a</sup> | Away from major roads (n = 392) <sup>a</sup> | Difference <sup>bc</sup> (model 1) | Difference <sup>bc</sup> (model 2) | Difference <sup>bc</sup> (model 3) | Difference <sup>bc</sup> (model 4) |
|-------------------------------------|---------------------------------------------|----------------------------------------------|------------------------------------|------------------------------------|------------------------------------|------------------------------------|
| CIMT (µm/year)                      | 8.93 ± 10.57                                | 9.41 ± 12.29                                 | -0.49<br>(-3.07 to 2.09)           | -1.01<br>(-3.62 to 1.61)           | -1.02<br>(-3.66 to 1.63)           | -0.78<br>(-3.49 to 1.92)           |
| Plaque area (mm <sup>2</sup> /year) | 1.35 ± 2.72                                 | 1.26 ± 2.25                                  | 0.09<br>(-0.42 to 0.6)             | 0.03<br>(-0.46 to 0.52)            | 0.03<br>(-0.46 to 0.53)            | 0.07<br>(-0.42 to 0.57)            |
| Plaque number (per year)            | 0.14 ± 0.21                                 | 0.13 ± 0.20                                  | 0.02<br>(-0.03 to 0.06)            | 0.01<br>(-0.03 to 0.05)            | 0.01<br>(-0.04 to 0.05)            | 0.01<br>(-0.04 to 0.05)            |
| Total area (mm <sup>2</sup> /year)  | 1.52 ± 2.79                                 | 1.43 ± 2.30                                  | 0.09<br>(-0.43 to 0.61)            | 0.03<br>(-0.47 to 0.53)            | 0.03<br>(-0.47 to 0.54)            | 0.08<br>(-0.43 to 0.59)            |

Abbreviation: CIMT, carotid intima-media thickness.

<sup>a</sup>Data are presented as mean ± standard deviation.

<sup>b</sup>Difference of least squares means between the group close to and the group away from major roads (the group away from major roads was the reference category).

<sup>c</sup>Model 1 was a crude unadjusted model; model 2 was adjusted for age, sex, and ethnicity; model 3 was further adjusted for BMI, smoking status, physical activity, education, and annual household income; model 4 was additionally adjusted for systolic blood pressure, LDL-C, HDL-C, neighborhood income levels, and neighborhood education levels.

**Table 5.** Changes in annual changes of carotid artery atherosclerosis associated with an IQR elevation in traffic-related air pollutants and community noise<sup>a</sup>

| Atherosclerosis                           | Black carbon<br>( $1.01 \times 10^{-5}/\text{m}$ ) <sup>b</sup> | PM <sub>2.5</sub><br>( $1.41 \mu\text{g}/\text{m}^3$ ) <sup>b</sup> | NO <sub>2</sub><br>( $4.07 \mu\text{g}/\text{m}^3$ ) <sup>b</sup> | NO<br>( $10.83 \mu\text{g}/\text{m}^3$ ) <sup>b</sup> | Noise<br>( $8.69 \text{dB(A)}$ ) <sup>bc</sup> |
|-------------------------------------------|-----------------------------------------------------------------|---------------------------------------------------------------------|-------------------------------------------------------------------|-------------------------------------------------------|------------------------------------------------|
| CIMT ( $\mu\text{m}/\text{year}$ )        | -0.32<br>(-1.41 to 0.78)                                        | 0.20<br>(-0.99 to 1.39)                                             | -0.06<br>(-1.36 to 1.23)                                          | -1.07<br>(-2.47 to 0.32)                              | -0.66<br>(-2.44 to 1.12)                       |
| Plaque area ( $\text{mm}^2/\text{year}$ ) | -0.08<br>(-0.28 to 0.12)                                        | 0.18<br>(-0.04 to 0.39)                                             | 0.07<br>(-0.17 to 0.31)                                           | 0.10<br>(-0.16 to 0.35)                               | 0.16<br>(-0.16 to 0.49)                        |
| Plaque number (per year)                  | -0.00<br>(-0.02 to 0.02)                                        | 0.02<br>(-0.00 to 0.03)                                             | 0.01<br>(-0.01 to 0.03)                                           | 0.01<br>(-0.01 to 0.03)                               | 0.02<br>(-0.01 to 0.04)                        |
| Total area ( $\text{mm}^2/\text{year}$ )  | -0.08<br>(-0.29 to 0.12)                                        | 0.17<br>(-0.05 to 0.40)                                             | 0.08<br>(-0.17 to 0.32)                                           | 0.08<br>(-0.18 to 0.34)                               | 0.17<br>(-0.16 to 0.50)                        |

Abbreviations: CIMT, carotid intima-media thickness; IQR, interquartile range; NO, nitric oxide; NO<sub>2</sub>, nitrogen dioxide; PM<sub>2.5</sub>, particulate matter < 2.5  $\mu\text{m}$  in aerodynamic diameter;

<sup>a</sup>Adjusted for age, sex, ethnicity, BMI, smoking status, physical activity, education, annual household income, systolic blood pressure, LDL-C, HDL-C, **neighborhood income levels, and neighborhood education levels.** In the analysis for each air pollutant, community noise was included as a covariate; in the analysis for community noise, black carbon, PM<sub>2.5</sub>, and NO<sub>2</sub> were included as covariates.

<sup>b</sup>Interquartile range for the pollutant.

<sup>c</sup>Annual day-evening-night A-weighted equivalent continuous noise level.

**Table 6.** Mean differences (95% CIs) in annual changes of carotid artery atherosclerosis between the group close to and the group away from major road (the reference category)<sup>a</sup>

|                                                 | CIMT ( $\mu\text{m}$ ) | Plaque area ( $\text{mm}^2$ ) | Plaque number              | Total area ( $\text{mm}^2$ )  |
|-------------------------------------------------|------------------------|-------------------------------|----------------------------|-------------------------------|
| Age                                             |                        |                               |                            |                               |
| < 60 yr                                         | -0.76 (-3.59 to 2.08)  | 0.01 (-0.51 to 0.53)          | 0.00 (-0.05 to 0.05)       | 0.02 (-0.51 to 0.56)          |
| $\geq$ 60 yr                                    | 1.38 (-11.27 to 14.02) | -0.18 (-2.53 to 2.17)         | 0.02 (-0.18 to 0.23)       | -0.16 (-2.52 to 2.19)         |
| Sex                                             |                        |                               |                            |                               |
| Men                                             | 1.29 (-2.81 to 5.39)   | 0.22 (-0.64 to 1.07)          | 0.00 (-0.07 to 0.07)       | 0.24 (-0.63 to 1.12)          |
| Women                                           | -1.97 (-5.69 to 1.75)  | -0.06 (-0.57 to 0.45)         | 0.01 (-0.04 to 0.07)       | -0.07 (-0.59 to 0.45)         |
| Race                                            |                        |                               |                            |                               |
| Aboriginal                                      | -2.41 (-9.48 to 4.66)  | 0.81 (-0.36 to 1.99)          | 0.04 (-0.12 to 0.20)       | 0.77 (-0.43 to 1.97)          |
| Chinese                                         | 0.89 (-4.67 to 6.45)   | <b>1.12 (0.21 to 2.03)</b>    | <b>0.08 (0.00 to 0.16)</b> | <b>1.21 (0.30 to 2.12)</b>    |
| European                                        | -2.80 (-7.97 to 2.37)  | <b>-1.86 (-3.06 to -0.65)</b> | -0.10 (-0.19 to 0.00)      | <b>-1.92 (-3.16 to -0.68)</b> |
| South Asian                                     | 1.18 (-5.44 to 7.79)   | 0.29 (-0.53 to 1.12)          | 0.02 (-0.07 to 0.1)        | 0.32 (-0.54 to 1.17)          |
| Annual household income                         |                        |                               |                            |                               |
| < \$30,000                                      | -1.67 (-7.78 to 4.44)  | -0.07 (-0.98 to 0.85)         | 0.04 (-0.04 to 0.12)       | -0.10 (-1.04 to 0.84)         |
| \$30,000 to \$60,000                            | -2.86 (-6.84 to 1.11)  | -0.20 (-0.84 to 0.44)         | -0.01 (-0.08 to 0.06)      | -0.19 (-0.84 to 0.45)         |
| $\geq$ \$60,000                                 | 1.99 (-3.39 to 7.37)   | 0.61 (-0.48 to 1.7)           | 0.00 (-0.08 to 0.09)       | 0.65 (-0.47 to 1.77)          |
| Education                                       |                        |                               |                            |                               |
| $\leq$ High school                              | 2.57 (-3.05 to 8.20)   | <b>-1.01 (-1.91 to -0.11)</b> | -0.05 (-0.13 to 0.04)      | <b>-0.92 (-1.82 to -0.02)</b> |
| > High school                                   | -1.60 (-4.81 to 1.61)  | 0.49 (-0.12 to 1.10)          | 0.02 (-0.03 to 0.07)       | 0.46 (-0.17 to 1.09)          |
| Obesity (BMI $\geq$ 30 $\text{kg}/\text{m}^2$ ) |                        |                               |                            |                               |
| No                                              | -1.24 (-4.34 to 1.85)  | -0.05 (-0.60 to 0.49)         | 0.01 (-0.04 to 0.06)       | -0.04 (-0.60 to 0.51)         |
| Yes                                             | 1.81 (-4.94 to 8.56)   | 0.60 (-0.81 to 2.00)          | 0.05 (-0.06 to 0.17)       | 0.64 (-0.80 to 2.07)          |
| Smoke status                                    |                        |                               |                            |                               |
| Current                                         | -9.58 (-26.66 to 7.50) | -1.20 (-4.94 to 2.54)         | -0.09 (-0.45 to 0.28)      | -1.41 (-5.29 to 2.47)         |
| Former                                          | -1.92 (-7.89 to 4.05)  | -0.52 (-1.60 to 0.55)         | -0.01 (-0.11 to 0.09)      | -0.56 (-1.66 to 0.54)         |
| Never                                           | 0.30 (-3.14 to 3.73)   | 0.24 (-0.38 to 0.86)          | 0.00 (-0.06 to 0.05)       | 0.27 (-0.36 to 0.90)          |

<sup>a</sup>Stratified by each covariate, adjusted for all other covariates in the table, and also age, BMI, physical activity, systolic blood pressure, LDL-C, HDL-C, neighborhood income levels, and neighborhood education levels.

## REFERENCES

- 1 Brook RD, Rajagopalan S, Pope CA, 3rd et al. Particulate matter air pollution and cardiovascular disease: An update to the scientific statement from the American Heart Association. *Circulation* 2010;121:2331-78.
- 2 Lusis AJ. Atherosclerosis. *Nature* 2000;407:233-41.
- 3 Libby P, Theroux P. Pathophysiology of coronary artery disease. *Circulation* 2005;111:3481-8.
- 4 Ross R. The pathogenesis of atherosclerosis: a perspective for the 1990s. *Nature* 1993;362:801-9.
- 5 Chambless LE, Heiss G, Folsom AR et al. Association of coronary heart disease incidence with carotid arterial wall thickness and major risk factors: the Atherosclerosis Risk in Communities (ARIC) Study, 1987-1993. *Am J Epidemiol* 1997;146:483-94.
- 6 Stein JH, Korcarz CE, Hurst RT et al. Use of carotid ultrasound to identify subclinical vascular disease and evaluate cardiovascular disease risk: a consensus statement from the American Society of Echocardiography Carotid Intima-Media Thickness Task Force. Endorsed by the Society for Vascular Medicine. *J Am Soc Echocardiogr* 2008;21:93-111; quiz 189-90.
- 7 Chambless LE, Folsom AR, Clegg LX et al. Carotid wall thickness is predictive of incident clinical stroke: the Atherosclerosis Risk in Communities (ARIC) study. *Am J Epidemiol* 2000;151:478-87.
- 8 Kunzli N, Perez L, von Klot S et al. Investigating air pollution and atherosclerosis in humans: concepts and outlook. *Prog Cardiovasc Dis* 2011;53:334-43.
- 9 Sun Q, Wang A, Jin X et al. Long-term air pollution exposure and acceleration of atherosclerosis and vascular inflammation in an animal model. *JAMA* 2005;294:3003-10.
- 10 Suwa T, Hogg JC, Quinlan KB, Ohgami A, Vincent R, van Eeden SF. Particulate air pollution induces progression of atherosclerosis. *J Am Coll Cardiol* 2002;39:935-42.
- 11 Kunzli N, Jerrett M, Mack WJ et al. Ambient air pollution and atherosclerosis in Los Angeles. *Environ Health Perspect* 2005;113:201-6.
- 12 Diez Roux AV, Auchincloss AH, Franklin TG et al. Long-term exposure to ambient particulate matter and prevalence of subclinical atherosclerosis in the Multi-Ethnic Study of Atherosclerosis. *Am J Epidemiol* 2008;167:667-75.
- 13 Allen RW, Criqui MH, Diez Roux AV et al. Fine particulate matter air pollution, proximity to traffic, and aortic atherosclerosis. *Epidemiology* 2009;20:254-64.
- 14 Hoffmann B, Moebus S, Mohlenkamp S et al. Residential exposure to traffic is associated with coronary atherosclerosis. *Circulation* 2007;116:489-96.
- 15 Bauer M, Moebus S, Mohlenkamp S et al. Urban particulate matter air pollution is associated with subclinical atherosclerosis: results from the HNR (Heinz Nixdorf Recall) study. *J Am Coll Cardiol* 2010;56:1803-8.
- 16 Adar SD, Sheppard L, Vedal S et al. Fine particulate air pollution and the progression of carotid intima-medial thickness: a prospective cohort study from the multi-ethnic study of atherosclerosis and air pollution. *PLoS Med* 2013;10:e1001430.
- 17 Kunzli N, Jerrett M, Garcia-Esteban R et al. Ambient air pollution and the progression of atherosclerosis in adults. *PLoS One* 2010;5:e9096.

- 1  
2  
3 18 Brook RD, Franklin B, Cascio W et al. Air pollution and cardiovascular disease: a  
4 statement for healthcare professionals from the Expert Panel on Population and  
5 Prevention Science of the American Heart Association. *Circulation* 2004;109:2655-71.  
6  
7 19 Health Effects Institute. Traffic-Related Air Pollution. A Critical Review of the Literature  
8 on Emissions, Exposure, and Health Effects 2010.  
9  
10 20 Zhu Y, Hinds WC, Kim S, Sioutas C. Concentration and size distribution of ultrafine  
11 particles near a major highway. *J Air Waste Manag Assoc* 2002;52:1032-42.  
12  
13 21 Zhou Y, Levy JI. Factors influencing the spatial extent of mobile source air pollution  
14 impacts: a meta-analysis. *Bmc Public Health* 2007;7:89.  
15  
16 22 Jerrett M, Arain A, Kanaroglou P et al. A review and evaluation of intraurban air  
17 pollution exposure models. *J Expo Anal Environ Epidemiol* 2005;15:185-204.  
18  
19 23 Gan WQ, Tamburic L, Davies HW, Demers PA, Koehoorn M, Brauer M. Changes in  
20 residential proximity to road traffic and the risk of death from coronary heart disease.  
21 *Epidemiology* 2010;21:642-9.  
22  
23 24 Gan WQ, Koehoorn M, Davies HW, Demers PA, Tamburic L, Brauer M. Long-term  
24 exposure to traffic-related air pollution and the risk of coronary heart disease  
25 hospitalization and mortality. *Environ Health Perspect* 2011;119:501-7.  
26  
27 25 Gan WQ, Davies HW, Koehoorn M, Brauer M. Association of long-term exposure to  
28 community noise and traffic-related air pollution with coronary heart disease mortality.  
29 *Am J Epidemiol* 2012;175:898-906.  
30  
31 26 Lear SA, Birmingham CL, Chockalingam A, Humphries KH. Study design of the  
32 Multicultural Community Health Assessment Trial (M-CHAT): a comparison of body fat  
33 distribution in four distinct populations. *Ethn Dis* 2006;16:96-100.  
34  
35 27 Lear SA, Humphries KH, Kohli S, Frohlich JJ, Birmingham CL, Mancini GB. Visceral  
36 adipose tissue, a potential risk factor for carotid atherosclerosis: results of the  
37 Multicultural Community Health Assessment Trial (M-CHAT). *Stroke* 2007;38:2422-9.  
38  
39 28 Brauer M, Hystad P, Reynolds C. Environmental guidelines for urban and rural land  
40 development in British Columbia: supporting information on air quality. 2012.  
41  
42 29 Henderson SB, Beckerman B, Jerrett M, Brauer M. Application of land use regression to  
43 estimate long-term concentrations of traffic-related nitrogen oxides and fine particulate  
44 matter. *Environ Sci Technol* 2007;41:2422-8.  
45  
46 30 Larson T, Henderson SB, Brauer M. Mobile Monitoring of Particle Light Absorption  
47 Coefficient in an Urban Area as a Basis for Land Use Regression. *Environmental Science  
& Technology* 2009;43:4672-4678.  
48  
49 31 Brauer M, Lencar C, Tamburic L, Koehoorn M, Demers P, Karr C. A cohort study of  
50 traffic-related air pollution impacts on birth outcomes. *Environ Health Perspect*  
51 2008;116:680-6.  
52  
53 32 Wang RR, Henderson SB, Sbihi H, Allen RW, Brauer M. Temporal stability of land use  
54 regression models for traffic-related air pollution. *Atmospheric Environment*  
55 2013;64:312-319.  
56  
57 33 Aminbakhsh A, Frohlich J, Mancini GB. Detection of early atherosclerosis with B mode  
58 carotid ultrasonography: assessment of a new quantitative approach. *Clin Invest Med*  
59 1999;22:265-74.  
60



- 1  
2  
3 34 Chan SY, Mancini GB, Kuramoto L, Schulzer M, Frohlich J, Ignaszewski A. The  
4 prognostic importance of endothelial dysfunction and carotid atheroma burden in patients  
5 with coronary artery disease. *J Am Coll Cardiol* 2003;42:1037-43.  
6  
7 35 Gan WQ, McLean K, Brauer M, Chiarello SA, Davies HW. Modeling population  
8 exposure to community noise and air pollution in a large metropolitan area. *Environ Res*  
9 2012;116:11-6.  
10  
11 36 Wilker EH, Mittleman MA, Coull BA et al. Long-term Exposure to Black Carbon and  
12 Carotid Intima-Media Thickness: The Normative Aging Study. *Environ Health Perspect*  
13 2013;121:1061-7.  
14  
15 37 Painschab MS, Davila-Roman VG, Gilman RH et al. Chronic exposure to biomass fuel is  
16 associated with increased carotid artery intima-media thickness and a higher prevalence of  
17 atherosclerotic plaque. *Heart* 2013;99:984-91.  
18  
19 38 Rivera M, Basagana X, Aguilera I et al. Association between long-term exposure to  
20 traffic-related air pollution and subclinical atherosclerosis: the REGICOR study. *Environ*  
21 *Health Perspect* 2013;121:223-30.  
22  
23 39 Sun M, Kaufman JD, Kim SY et al. Particulate matter components and subclinical  
24 atherosclerosis: common approaches to estimating exposure in a Multi-Ethnic Study of  
25 Atherosclerosis cross-sectional study. *Environ Health* 2013;12:39.  
26  
27 40 Bonner MR, Han D, Nie J, Rogerson P, Vena JE, Freudenheim JL. Positional accuracy of  
28 geocoded addresses in epidemiologic research. *Epidemiology* 2003;14:408-12.  
29  
30 41 Xie SD, Zhang YH, Li Q, Tang XY. Spatial distribution of traffic-related pollutant  
31 concentrations in street canyons. *Atmospheric Environment* 2003;37:3213-3224.  
32  
33 42 Restrepo C, Zimmerman R, Thurston G et al. A comparison of ground-level air quality  
34 data with New York State Department of Environmental Conservation monitoring  
35 stations data in South Bronx, New York. *Atmospheric Environment* 2004;38:5295-5304.  
36  
37 43 Hystad PU, Setton EM, Allen RW, Keller PC, Brauer M. Modeling residential fine  
38 particulate matter infiltration for exposure assessment. *J Expo Sci Environ Epidemiol*  
39 2009;19:570-9.  
40  
41 44 Janssen NA, Hoek G, Brunekreef B, Harssema H, Mensink I, Zuidhof A. Personal  
42 sampling of particles in adults: relation among personal, indoor, and outdoor air  
43 concentrations. *Am J Epidemiol* 1998;147:537-47.  
44  
45 45 Nethery E, Leckie SE, Teschke K, Brauer M. From measures to models: an evaluation of  
46 air pollution exposure assessment for epidemiological studies of pregnant women. *Occup*  
47 *Environ Med* 2008;65:579-86.  
48  
49 46 Shanmugam N, Roman-Rego A, Ong P, Kaski JC. Atherosclerotic plaque regression: fact  
50 or fiction? *Cardiovasc Drugs Ther* 2010;24:311-7.  
51  
52  
53  
54  
55  
56  
57  
58  
59  
60

## Supplementary Material

### Long-Term Exposure to Traffic-Related Air Pollution and Progression of Carotid Artery Atherosclerosis

Wen Qi Gan, Ryan W. Allen, Michael Brauer,  
Hugh W. Davies, G.B. John Mancini, Scott A. Lear

#### Table of Contents:

**Etable 1.** Comparisons of baseline characteristics for participants who were lost to and those who completed the follow-up

**Etable 2.** Comparisons of baseline carotid artery atherosclerosis for participants who were lost to and those who completed the follow-up

**Etable 3.** Number of participants (row percentage) with different annual changes in carotid atherosclerosis

**Etable 4.** Mean differences (95% CIs) in annual changes of carotid artery atherosclerosis between the group close to and the group away from major road (the reference category) for participants with increased carotid atherosclerosis

**Etable 5.** Relative risks (95% CIs) of having greater progression ( $\geq$  the 85th percentile) in annual changes of carotid atherosclerosis for participants living close to major roads compared with those living away from major roads

**Etable 6.** Comparisons of three cohort studies on air pollution and CIMT

**Table 1.** Comparisons of baseline characteristics for participants who were lost to and those who completed the follow-up<sup>a</sup>

| Characteristic                                     | Lost to follow-up<br>(n = 251) | Finished follow-up<br>(n = 509) | P value |
|----------------------------------------------------|--------------------------------|---------------------------------|---------|
| Age (year)                                         | 45.6 ± 8.5                     | 46.8 ± 9.0                      | 0.083   |
| Sex, male (%)                                      | 48                             | 49                              | 0.735   |
| Race (%)                                           |                                |                                 | < 0.001 |
| Aboriginal                                         | 37                             | 14                              |         |
| Chinese                                            | 25                             | 30                              |         |
| European                                           | 15                             | 29                              |         |
| South Asian                                        | 23                             | 27                              |         |
| Education (%)                                      |                                |                                 | < 0.001 |
| ≤ High school                                      | 44                             | 27                              |         |
| > High school                                      | 56                             | 73                              |         |
| Annual household income (%)                        |                                |                                 | < 0.001 |
| < \$30,000                                         | 39                             | 24                              |         |
| \$30,000 to \$60,000                               | 35                             | 37                              |         |
| ≥ \$60,000                                         | 26                             | 39                              |         |
| Smoke status (%)                                   |                                |                                 | < 0.001 |
| Current                                            | 17                             | 7                               |         |
| Former                                             | 25                             | 27                              |         |
| Never                                              | 58                             | 66                              |         |
| Alcohol intake (yes, %)                            | 23                             | 32                              | 0.015   |
| Physical activity <sup>b</sup><br>(hours per week) | 4.0<br>(1.7 – 8.1)             | 3.5<br>(1.7 – 6.5)              | 0.119   |
| Body mass index (kg/m <sup>2</sup> )               | 27.9 ± 5.0                     | 27.2 ± 4.7                      | 0.047   |
| SBP (mmHg)                                         | 117.9 ± 16.5                   | 118.1 ± 14.8                    | 0.862   |
| DBP (mmHg)                                         | 77.6 ± 11.3                    | 77.2 ± 9.4                      | 0.584   |
| Total cholesterol (mmol/L)                         | 5.2 ± 1.0                      | 5.2 ± 1.0                       | 0.810   |
| LDL-C (mmol/L)                                     | 3.2 ± 0.9                      | 3.2 ± 0.9                       | 0.460   |
| HDL-C (mmol/L)                                     | 1.3 ± 0.3                      | 1.3 ± 0.4                       | 0.746   |

Abbreviations: DBP, diastolic blood pressure; HDL-C, high-density lipoprotein cholesterol; LDL-C, low-density lipoprotein cholesterol; MET, metabolic equivalent of task; SBP, systolic blood pressure.

<sup>a</sup>Data are presented as percentage for categorical variables or mean ± SD for continuous variables; unless otherwise specified.

<sup>b</sup>Median (interquartile range).

**Table 2.** Comparisons of baseline carotid artery atherosclerosis for participants who were lost to and those who completed the follow-up<sup>a</sup>

| Atherosclerosis                | Lost to follow-up<br>(n = 251) | Finished follow-up<br>(n = 509) | <i>P</i> value |
|--------------------------------|--------------------------------|---------------------------------|----------------|
| CIMT (μm)                      | 677 ± 137                      | 673 ± 122                       | 0.656          |
| Plaque area (mm <sup>2</sup> ) | 6.26 ± 11.94                   | 6.61 ± 13.46                    | 0.728          |
| Plaque number                  | 0.87 ± 1.23                    | 0.88 ± 1.14                     | 0.915          |
| Total area (mm <sup>2</sup> )  | 19.8 ± 13.2                    | 20.0 ± 14.6                     | 0.798          |

<sup>a</sup>Data are presented as mean ± SD.

**Table 3.** Number of participants (row percentage) with different annual changes in carotid atherosclerosis

| Atherosclerosis                           | Decrease (< 0) | No change (= 0) | Increase (> 0) |
|-------------------------------------------|----------------|-----------------|----------------|
| CIMT ( $\mu\text{m}/\text{year}$ )        | 86<br>(17%)    | 27<br>(5%)      | 396<br>(78%)   |
| Plaque area ( $\text{mm}^2/\text{year}$ ) | 61<br>(12%)    | 145<br>(28%)    | 303<br>(60%)   |
| Plaque number (per year)                  | 29<br>(6%)     | 231<br>(45%)    | 249<br>(49%)   |
| Total area ( $\text{mm}^2/\text{year}$ )  | 86<br>(17%)    | 6<br>(1%)       | 417<br>(82%)   |

Abbreviations: CIMT, carotid intima-media thickness.

**Table 4.** Mean differences (95% CIs) in annual changes of carotid artery atherosclerosis between the group close to and the group away from major road (the reference category) for participants with increased carotid atherosclerosis (annual change > 0)

| Atherosclerosis                                                                     | Close to major roads <sup>a</sup> | Away from major roads <sup>a</sup> | Difference <sup>bc</sup> (model 1) | Difference <sup>bc</sup> (model 2) | Difference <sup>bc</sup> (model 3) | Difference <sup>bc</sup> (model 4) |
|-------------------------------------------------------------------------------------|-----------------------------------|------------------------------------|------------------------------------|------------------------------------|------------------------------------|------------------------------------|
| CIMT ( $\mu\text{m}/\text{year}$ )<br>( $n_1 = 90, n_2 = 306$ ) <sup>d</sup>        | 12.4 $\pm$ 9.1                    | 13.6 $\pm$ 9.6                     | -1.20<br>(-3.52 to 1.13)           | -1.68<br>(-4.02 to 0.66)           | -1.65<br>(-4.03 to 0.72)           | -1.08<br>(-3.51 to 1.35)           |
| Plaque area ( $\text{mm}^2/\text{year}$ )<br>( $n_1 = 76, n_2 = 227$ ) <sup>d</sup> | 2.19 $\pm$ 3.04                   | 2.30 $\pm$ 2.42                    | -0.11<br>(-0.82 to 0.59)           | -0.08<br>(-0.76 to 0.59)           | -0.06<br>(-0.74 to 0.63)           | 0.00<br>(-0.70 to 0.71)            |
| Plaque number (per year)<br>( $n_1 = 64, n_2 = 185$ ) <sup>d</sup>                  | 0.23 $\pm$ 0.20                   | 0.23 $\pm$ 0.19                    | 0.00<br>(-0.06 to 0.05)            | -0.01<br>(-0.06 to 0.05)           | -0.01<br>(-0.06 to 0.05)           | -0.01<br>(-0.07 to 0.04)           |
| Total area ( $\text{mm}^2/\text{year}$ )<br>( $n_1 = 100, n_2 = 317$ ) <sup>d</sup> | 1.84 $\pm$ 2.86                   | 1.85 $\pm$ 2.34                    | -0.02<br>(-0.59 to 0.56)           | -0.11<br>(-0.67 to 0.44)           | -0.11<br>(-0.67 to 0.44)           | -0.02<br>(-0.58 to 0.53)           |

Abbreviations: CIMT, carotid intima-media thickness.

<sup>a</sup>Data are presented as mean  $\pm$  standard deviation.

<sup>b</sup>Difference of least squares means between the group close to and the group away from major roads (the group away from major roads was the reference category).

<sup>c</sup>Model 1 was a crude unadjusted model; model 2 was adjusted for age, sex, and ethnicity; model 3 was further adjusted for BMI, smoking status, physical activity, education, and annual household income; model 4 was additionally adjusted for systolic blood pressure, LDL-C, HDL-C, neighborhood income levels, and neighborhood education levels.

<sup>d</sup> $n_1$  is for participants living close to major roads,  $n_2$  is for participants living away from major roads.

**Table 5.** Relative risks (95% CIs) of having greater progression ( $\geq$  the 85th percentile) in annual changes of carotid artery atherosclerosis for participants living close to major roads compared with those living away from major roads (the reference category)<sup>a</sup>

| Annual change $\geq$<br>85th percentile             | RR (95% CI) <sup>b</sup><br>(model 1) | RR (95% CI) <sup>b</sup><br>(model 2) | RR (95% CI) <sup>b</sup><br>(model 3) | RR (95% CI) <sup>b</sup><br>(model 4) |
|-----------------------------------------------------|---------------------------------------|---------------------------------------|---------------------------------------|---------------------------------------|
| CIMT $\geq$ 19.19 $\mu\text{m}/\text{year}^c$       | 0.99 (0.55 -1.78)                     | 0.78 (0.42-1.42)                      | 0.77 (0.42-1.42)                      | 0.81 (0.42-1.57)                      |
| Plaque area $\geq$ 2.95 $\text{mm}^2/\text{year}^c$ | 0.81 (0.44-1.51)                      | 0.50 (0.26-0.95)                      | 0.54 (0.28-1.05)                      | 0.55 (0.27-1.12)                      |
| Plaque number $\geq$ 0.36 per year <sup>c</sup>     | 1.07 (0.60-1.89)                      | 0.80 (0.45-1.45)                      | 0.81 (0.44-1.47)                      | 0.78 (0.42-1.46)                      |
| Total area $\geq$ 3.17 $\text{mm}^2/\text{year}^c$  | 0.84 (0.45-1.57)                      | 0.50 (0.26-0.96)                      | 0.56 (0.29-1.10)                      | 0.58 (0.29-1.20)                      |

Abbreviations: CI, confidence interval; CIMT, carotid intima-media thickness; RR, relative risk.

<sup>a</sup>The Cox proportional hazard model was used for the data analyses.

<sup>b</sup>Model 1 was a crude unadjusted model; model 2 was adjusted for age, sex, and ethnicity; model 3 was further adjusted for BMI, smoking status, physical activity, education, and annual household income; model 4 was additionally adjusted for systolic blood pressure, LDL-C, HDL-C, neighborhood income levels, and neighborhood education levels.

<sup>c</sup>The 85th percentile for the atherosclerosis marker.

**Etable 6.** Comparisons of three cohort studies on air pollution and CIMT<sup>a</sup>

| Characteristic                                  | Current Study<br>(n = 509) | Adar <i>et al.</i> 2013 <sup>1</sup><br>(n = 4955) | Kunzli <i>et al.</i> 2010 <sup>2</sup><br>(n = 1483) |
|-------------------------------------------------|----------------------------|----------------------------------------------------|------------------------------------------------------|
| Region                                          | Vancouver,<br>Canada       | Los Angeles and<br>other 5 U.S. cities             | Los Angeles                                          |
| Baseline PM <sub>2.5</sub> (µg/m <sup>3</sup> ) | 4.1 ± 1.5                  | 16.6 ± 3.7                                         | 27.8 ± 2.4                                           |
| Mean follow-up time (years)                     | 5.5 ± 0.4                  | 2.5 ± 0.8                                          | 1.8 – 3.3 <sup>b</sup>                               |
| Age (year)                                      | 47 ± 9                     | 62 ± 10                                            | 59 ± 10                                              |
| Male sex (%)                                    | 49                         | 38                                                 | 37                                                   |
| BMI (kg/m <sup>2</sup> )                        | 27.2 ± 4.8                 | 28.2 ± 5.3                                         | 29.2 ± 5.5                                           |
| Current smokers (%)                             | 7                          | 12                                                 | 3                                                    |
| LDL-C (mmol/L)                                  | 3.2 ± 0.9                  | 3.0 ± 0.8                                          | 3.5 ± 0.9                                            |
| SBP (mmHg)                                      | 118 ± 15                   | 126 ± 21                                           | 131 ± 18                                             |
| Baseline CIMT (µm)                              | 673 ± 122                  | 678 ± 189                                          | 780 ± 150                                            |
| Annual change in CIMT (µm/yr)                   | 9.2 ± 12.1                 | 14.0 ± 53.0                                        | 2.0 ± 12.9                                           |

Abbreviations: CIMT, carotid intima-media thickness; LDL-C, low-density lipoprotein cholesterol; SBP, systolic blood pressure.

<sup>a</sup>Data are presented as percentage for categorical variables and mean ± SD for continuous variables.

<sup>b</sup>Range of average follow-up time for the five clinical trials.



**REFERENCES**

1. **Adar SD**, Sheppard L, Vedal S et al. Fine particulate air pollution and the progression of carotid intima-medial thickness: a prospective cohort study from the multi-ethnic study of atherosclerosis and air pollution. *PLoS Med* 2013;**10**:e1001430.
2. **Kunzli N**, Jerrett M, Garcia-Esteban R et al. Ambient air pollution and the progression of atherosclerosis in adults. *PLoS One* 2010;**5**:e9096.

STROBE 2007 (v4) Statement—Checklist of items that should be included in reports of cohort studies

| Section/Topic             | Item # | Recommendation                                                                                                                                                                       | Reported on page # |
|---------------------------|--------|--------------------------------------------------------------------------------------------------------------------------------------------------------------------------------------|--------------------|
| Title and abstract        | 1      | (a) Indicate the study’s design with a commonly used term in the title or the abstract                                                                                               | 1-2                |
|                           |        | (b) Provide in the abstract an informative and balanced summary of what was done and what was found                                                                                  | 2-3                |
| <b>Introduction</b>       |        |                                                                                                                                                                                      |                    |
| Background/rationale      | 2      | Explain the scientific background and rationale for the investigation being reported                                                                                                 | 4-5                |
| Objectives                | 3      | State specific objectives, including any prespecified hypotheses                                                                                                                     | 5                  |
| <b>Methods</b>            |        |                                                                                                                                                                                      |                    |
| Study design              | 4      | Present key elements of study design early in the paper                                                                                                                              | 6                  |
| Setting                   | 5      | Describe the setting, locations, and relevant dates, including periods of recruitment, exposure, follow-up, and data collection                                                      | 6-10               |
| Participants              | 6      | (a) Give the eligibility criteria, and the sources and methods of selection of participants. Describe methods of follow-up                                                           | 6                  |
|                           |        | (b) For matched studies, give matching criteria and number of exposed and unexposed                                                                                                  | na                 |
| Variables                 | 7      | Clearly define all outcomes, exposures, predictors, potential confounders, and effect modifiers. Give diagnostic criteria, if applicable                                             | 7-10               |
| Data sources/ measurement | 8*     | For each variable of interest, give sources of data and details of methods of assessment (measurement). Describe comparability of assessment methods if there is more than one group | 7-10               |
| Bias                      | 9      | Describe any efforts to address potential sources of bias                                                                                                                            | 10-11              |
| Study size                | 10     | Explain how the study size was arrived at                                                                                                                                            | 12                 |
| Quantitative variables    | 11     | Explain how quantitative variables were handled in the analyses. If applicable, describe which groupings were chosen and why                                                         | 10-11              |
| Statistical methods       | 12     | (a) Describe all statistical methods, including those used to control for confounding                                                                                                | 10-11              |
|                           |        | (b) Describe any methods used to examine subgroups and interactions                                                                                                                  | 10-11              |
|                           |        | (c) Explain how missing data were addressed                                                                                                                                          | 12                 |
|                           |        | (d) If applicable, explain how loss to follow-up was addressed                                                                                                                       | 12                 |
|                           |        | (e) Describe any sensitivity analyses                                                                                                                                                | 10-11              |
| <b>Results</b>            |        |                                                                                                                                                                                      |                    |

|                          |     |                                                                                                                                                                                                              |       |
|--------------------------|-----|--------------------------------------------------------------------------------------------------------------------------------------------------------------------------------------------------------------|-------|
| Participants             | 13* | (a) Report numbers of individuals at each stage of study—eg numbers potentially eligible, examined for eligibility, confirmed eligible, included in the study, completing follow-up, and analysed            | 12    |
|                          |     | (b) Give reasons for non-participation at each stage                                                                                                                                                         | 12    |
|                          |     | (c) Consider use of a flow diagram                                                                                                                                                                           | na    |
| Descriptive data         | 14* | (a) Give characteristics of study participants (eg demographic, clinical, social) and information on exposures and potential confounders                                                                     | 12    |
|                          |     | (b) Indicate number of participants with missing data for each variable of interest                                                                                                                          | 12    |
|                          |     | (c) Summarise follow-up time (eg, average and total amount)                                                                                                                                                  | 12    |
| Outcome data             | 15* | Report numbers of outcome events or summary measures over time                                                                                                                                               | 13    |
| Main results             | 16  | (a) Give unadjusted estimates and, if applicable, confounder-adjusted estimates and their precision (eg, 95% confidence interval). Make clear which confounders were adjusted for and why they were included | 13-14 |
|                          |     | (b) Report category boundaries when continuous variables were categorized                                                                                                                                    | 13-14 |
|                          |     | (c) If relevant, consider translating estimates of relative risk into absolute risk for a meaningful time period                                                                                             | na    |
| Other analyses           | 17  | Report other analyses done—eg analyses of subgroups and interactions, and sensitivity analyses                                                                                                               | 13-14 |
| <b>Discussion</b>        |     |                                                                                                                                                                                                              |       |
| Key results              | 18  | Summarise key results with reference to study objectives                                                                                                                                                     | 14    |
| <b>Limitations</b>       |     |                                                                                                                                                                                                              |       |
| Interpretation           | 20  | Give a cautious overall interpretation of results considering objectives, limitations, multiplicity of analyses, results from similar studies, and other relevant evidence                                   | 18    |
| Generalisability         | 21  | Discuss the generalisability (external validity) of the study results                                                                                                                                        | 18    |
| <b>Other information</b> |     |                                                                                                                                                                                                              |       |
| Funding                  | 22  | Give the source of funding and the role of the funders for the present study and, if applicable, for the original study on which the present article is based                                                | 19    |

\*Give information separately for cases and controls in case-control studies and, if applicable, for exposed and unexposed groups in cohort and cross-sectional studies.

**Note:** An Explanation and Elaboration article discusses each checklist item and gives methodological background and published examples of transparent reporting. The STROBE checklist is best used in conjunction with this article (freely available on the Web sites of PLoS Medicine at <http://www.plosmedicine.org/>, Annals of Internal Medicine at <http://www.annals.org/>, and Epidemiology at <http://www.epidem.com/>). Information on the STROBE Initiative is available at [www.strobe-statement.org](http://www.strobe-statement.org).



**Long-Term Exposure to Traffic-Related Air Pollution and  
Progression of Carotid Artery Atherosclerosis: A Prospective  
Cohort Study**

|                                 |                                                                                                                                                                                                                                                                                                                                                                                                                                                                                     |
|---------------------------------|-------------------------------------------------------------------------------------------------------------------------------------------------------------------------------------------------------------------------------------------------------------------------------------------------------------------------------------------------------------------------------------------------------------------------------------------------------------------------------------|
| Journal:                        | <i>BMJ Open</i>                                                                                                                                                                                                                                                                                                                                                                                                                                                                     |
| Manuscript ID:                  | bmjopen-2013-004743.R1                                                                                                                                                                                                                                                                                                                                                                                                                                                              |
| Article Type:                   | Research                                                                                                                                                                                                                                                                                                                                                                                                                                                                            |
| Date Submitted by the Author:   | 25-Feb-2014                                                                                                                                                                                                                                                                                                                                                                                                                                                                         |
| Complete List of Authors:       | Gan, Wenqi; Hofstra North Shore-LIJ School of Medicine, Department of Population Health<br>Allen, Ryan; Simon Fraser University, Faculty of Health Sciences<br>Brauer, Michael; University of British Columbia, School of Population and Public Health<br>Davies, Hugh; University of British Columbia, School of Environmental Health<br>Mancini, John; University of British Columbia, Division of Cardiology<br>Lear, Scott; Simon Fraser University, Faculty of Health Sciences |
| <b>Primary Subject Heading</b>: | Occupational and environmental medicine                                                                                                                                                                                                                                                                                                                                                                                                                                             |
| Secondary Subject Heading:      | Cardiovascular medicine, Epidemiology, Public health                                                                                                                                                                                                                                                                                                                                                                                                                                |
| Keywords:                       | Cardiac Epidemiology < CARDIOLOGY, Coronary heart disease < CARDIOLOGY, OCCUPATIONAL & INDUSTRIAL MEDICINE, EPIDEMIOLOGY, PUBLIC HEALTH, PREVENTIVE MEDICINE                                                                                                                                                                                                                                                                                                                        |
|                                 |                                                                                                                                                                                                                                                                                                                                                                                                                                                                                     |

SCHOLARONE™  
Manuscripts

# Long-Term Exposure to Traffic-Related Air Pollution and Progression of Carotid Artery Atherosclerosis: A Prospective Cohort Study

Wen Qi Gan,<sup>1,2</sup> Ryan W. Allen,<sup>3</sup> Michael Brauer,<sup>4</sup>  
Hugh W. Davies,<sup>4</sup> G.B. John Mancini,<sup>5,6</sup> Scott A. Lear<sup>3,7,8</sup>

<sup>1</sup>Department of Population Health, Hofstra North Shore-LIJ School of Medicine, Great Neck, New York

<sup>2</sup>Feinstein Institute for Medical Research, North Shore-Long Island Jewish Health System, Great Neck, New York

<sup>3</sup>Faculty of Health Sciences, Simon Fraser University, Burnaby, British Columbia, Canada

<sup>4</sup>School of Population and Public Health, University of British Columbia, Vancouver, British Columbia, Canada

<sup>5</sup>Healthy Heart Program, St. Paul Hospital, Providence Healthcare, Vancouver, British Columbia, Canada

<sup>6</sup>Faculty of Medicine, Division of Cardiology, University of British Columbia, Vancouver, British Columbia, Canada

<sup>7</sup>Department of Biomedical Physiology and Kinesiology, Simon Fraser University, Burnaby, British Columbia, Canada

<sup>8</sup>Division of Cardiology, Providence Health Care, Vancouver, Canada

## Correspondence to:

Wen Qi Gan, MD PhD

175 Community Drive, Room 235

Great Neck, NY 11021

Phone: 516-465-3053

Fax: 516-465-2699

E-mail: [wgan@nshs.edu](mailto:wgan@nshs.edu)

1  
2  
3  
4  
5  
6  
7 **Key Words:** air pollution, atherosclerosis, cohort studies, vehicle emissions  
8

9 **Word Count (text): 4,519**  
10

## 11 **ABSTRACT**

12  
13 **Objectives:** Epidemiologic studies have demonstrated associations between long-term exposure to traffic-related air pollution and  
14 coronary heart disease (CHD). Atherosclerosis is the principal pathological process responsible for CHD events, but effects of traffic-  
15 related air pollution on progression of atherosclerosis are not clear. This study aimed to investigate associations between long-term  
16 exposure to traffic-related air pollution and progression of carotid artery atherosclerosis.  
17  
18

19  
20  
21  
22 **Setting:** Healthy volunteers in metropolitan Vancouver, Canada.  
23

24  
25 **Participants and outcome measures:** 509 participants aged 30-65 years were recruited and followed for approximately 5 years. At  
26 baseline and end of follow-up, participants underwent carotid artery ultrasound examinations to assess atherosclerosis severity,  
27 including carotid intima-media thickness, plaque area, plaque number, and total area. Annual change of each atherosclerosis marker  
28 during the follow-up period was calculated as the difference between these two measurements divided by years of follow-up. Living  
29 close to major roads was defined as  $\leq 150$  meters from a highway or  $\leq 50$  meters from a major road. Residential exposures to traffic-  
30 related air pollutants including black carbon, fine particles, nitrogen dioxide, and nitric oxide were estimated using high-resolution land  
31 use regression models. The data were analyzed using general linear models adjusting for various covariates.  
32  
33  
34  
35  
36  
37  
38  
39  
40  
41

1  
2  
3 **Results:** At baseline, there were no significant differences in any atherosclerosis markers between participants living close to and those  
4  
5 living away from major roads. After follow-up, the differences in annual changes of these markers between these two groups were  
6  
7 small and not statistically significant. Also, no significant associations were observed with concentrations of traffic-related air  
8  
9 pollutants including black carbon, fine particles, nitrogen dioxide, and nitric oxide.  
10  
11

12 **Conclusions:** This study did not find significant associations between traffic-related air pollution and progression of carotid artery  
13  
14 atherosclerosis in a region with lower levels and smaller contrasts of ambient air pollution.  
15  
16  
17  
18  
19  
20  
21

## 22 **ARTICLE SUMMARY**

### 23 **Strengths and limitations of this study**

- 24  
25 • This study utilized multiple markers, including carotid intima-media thickness, plaque area, plaque number, and total area, to  
26  
27 assess carotid artery atherosclerosis. Exposure to traffic-related air pollution was assessed using residential proximity to major  
28  
29 roads and spatially resolved estimates of residential exposure to black carbon, fine particles, nitrogen dioxide, and nitric oxide.  
30  
31
- 32 • This study simultaneously investigated cross-sectional and longitudinal associations between exposure to traffic-related air  
33  
34 pollution and carotid artery atherosclerosis in a large metropolitan area with relatively low levels of air pollution.  
35  
36  
37  
38  
39  
40  
41

- Compared with previous longitudinal studies, this study has a relatively long follow-up period (median 5.4 years, range 3.7–7.2 years).
- Small sample size, moderate progression of atherosclerosis in the study sample, along with lower levels and smaller contrasts of ambient air pollution in the study region, might limit our ability to detect presumably small effects of air pollution on progression of carotid artery atherosclerosis in this study.

## INTRODUCTION

Convincing epidemiologic evidence has demonstrated that long-term exposure to ambient air pollution is associated with cardiovascular disease, especially coronary heart disease (CHD), morbidity and mortality.<sup>1</sup> Although the biologic mechanisms underlying the associations are not fully understood, it is well known that atherosclerosis is the principal pathological process responsible for chronic and acute CHD events.<sup>2-4</sup> Atherosclerosis is a chronic condition characterized by a progressive buildup of plaques in the large arteries, which may cause chronic ischemia due to insufficient blood supply and acute cardiac events due to plaques rupture and blood clot.<sup>2,3</sup> Epidemiologic studies have shown that severity of atherosclerosis measured by carotid intima-media thickness (CIMT) is able to predict future cardiovascular risk (e.g., CHD and stroke) for people without cardiovascular diseases.<sup>5-7</sup>

It has been hypothesized that particulate air pollution is associated with cardiovascular outcomes through two major pathways: promoting atherosclerosis progression and triggering acute cardiac events in individuals with severe atherosclerosis, especially vulnerable plaques.<sup>3,8</sup> Short-term exposure studies have provided sufficient evidence to support acute triggering effects of particulate



1  
2  
3 air pollution.<sup>1</sup> Long-term exposure studies based on clinical outcomes presumably integrate both atherosclerosis progression and acute  
4 triggering effects, and thus have greater effect sizes than short-term exposure studies. However, these studies are unable to distinguish  
5 these two different adverse effects of particulate air pollution.<sup>1 8</sup> Evidence is needed to determine the role of particulate air pollution on  
6 progression of atherosclerosis.<sup>8</sup>  
7

8  
9  
10 Experimental studies in animals with risk factors for atherosclerosis have provided some evidence that exposure to particulate  
11 air pollution is associated with accelerated progression of atherosclerosis.<sup>9 10</sup> However, there is limited epidemiologic evidence in  
12 humans to corroborate these findings. Several cross-sectional studies have examined associations of atherosclerosis severity with  
13 residential proximity to road traffic and exposure to fine particulate air pollution, but their findings were not fully consistent.<sup>11-15</sup> Two  
14 recent longitudinal studies conducted in the United States have provided limited evidence to support an association between particulate  
15 air pollution and progression of atherosclerosis.<sup>16 17</sup> As suggested by Kunzli and colleagues,<sup>8</sup> it is necessary to further investigate the  
16 relationship between long-term air pollution exposure and progression of atherosclerosis.  
17  
18  
19

20  
21  
22 Air pollution is a complex mixture of particles, gases, and liquids, mainly derived from the combustion of fossil fuels.<sup>18</sup> In  
23 metropolitan areas, road traffic is a major source of ambient air pollution, and produces strong spatial gradients in pollution  
24 concentrations.<sup>19</sup> It has been demonstrated that the concentrations of traffic-related air pollutants decrease exponentially from major  
25 roadways and approach background concentrations within about 150 meters.<sup>20 21</sup> Therefore, the distance from each person's residence  
26 to a major roadway may be used as a convenient surrogate for exposure to traffic-related air pollution.<sup>22</sup> We have previously  
27  
28  
29

1  
2  
3 demonstrated in a large population-based cohort study conducted in metropolitan Vancouver, Canada, that residential proximity to  
4 road traffic and traffic-related fine particulate air pollution (black carbon) were associated with increased risk of CHD hospitalization  
5 and mortality.<sup>23-25</sup>  
6  
7

8  
9  
10 Based on the previous studies, we used a longitudinal study design to investigate the associations between progression of  
11 carotid artery atherosclerosis and long-term exposure to traffic-related air pollution, indicated by residential proximity to major roads  
12 and residential concentrations of four major traffic-related air pollutants including black carbon, particulate matter < 2.5 µm in  
13 aerodynamic diameter (PM<sub>2.5</sub>), nitrogen dioxide (NO<sub>2</sub>), and nitric oxide (NO), in metropolitan Vancouver.  
14  
15  
16  
17  
18

## 19 **MATERIALS AND METHODS**

### 20 **Participants and Study Design**

21  
22  
23 The current study was based on the Multicultural Community Health Assessment Trial (M-CHAT), which was designed to  
24 compare body fat distribution in different ethnic groups. The M-CHAT study design has been described in detail elsewhere.<sup>26 27</sup> During  
25 2004-2005, 829 apparently healthy volunteers aged 30-65 years and matched for body mass index (BMI) and ethnicity (Aboriginal,  
26 Chinese, European, and South Asian) were recruited in metropolitan Vancouver. During recruitment, individuals with the following  
27 characteristics were excluded: (1) having a prior diagnosis of cardiovascular disease or significant comorbidity such as diabetes or  
28 hypertension; (2) taking medications that affect cardiovascular risk factors such as lipid-lowering, antihypertensive, or hypoglycemic  
29  
30  
31  
32  
33  
34  
35  
36  
37  
38  
39  
40  
41  
42  
43  
44  
45  
46  
47  
48  
49

1  
2  
3 medications; (3) experiencing recent weight change more than 2.2 kg within recent three months; and (4) having significant prosthetics  
4  
5 or amputations.  
6  
7

8 The participants were followed for approximately five years. Each participant underwent carotid artery ultrasound examinations  
9  
10 to assess severity of atherosclerosis at baseline (2004-2005) and the end of follow-up (2009-2011). Residential proximity to major  
11  
12 roads and exposures to traffic-related air pollutants were estimated based on participants' residential addresses at baseline. Various  
13  
14 potential confounding factors were collected through standard questionnaires that were administered by trained interviewers. General  
15  
16 linear models were used to examine cross-sectional and longitudinal associations of carotid artery atherosclerosis with residential  
17  
18 traffic proximity and four major traffic-related air pollutants after adjustment for various potential confounding factors including  
19  
20 residential exposure to community noise.  
21  
22  
23  
24  
25  
26  
27  
28

## 29 **Exposure Assessment**

### 30 ***Residential Proximity to Major Roads***

31  
32  
33  
34 Residential proximity to major roads was estimated based on participants' geocoded baseline residential addresses using a  
35  
36 geographic information system (GIS). In DMTI ArcView street file dataset for British Columbia (Canmap Streetfiles, version 2006.3;  
37  
38 DMTI Spatial, Markham, Ontario, Canada), road types in the study region were divided into two categories: highway (DMTI type 1  
39  
40  
41  
42  
43  
44  
45

1  
2  
3 and 2 roads) including expressway (average traffic counts 114,000 vehicles/day) and principal highway (21,000 vehicles/day), or major  
4  
5 road (DMTI type 3 and 4 roads) including secondary highway (18,000 vehicles/day) and major road (15,000 vehicles/day). Based on  
6  
7 the differences in traffic volumes between highways and major roads,<sup>28</sup> and the previous findings that the concentrations of traffic-  
8  
9 related air pollutants decrease exponentially from major roads and approach background concentrations within about 150 meters,<sup>20 21</sup>  
10  
11 participants in the current study were divided into two groups: those living close to major roads, defined as  $\leq 150$  meters from a  
12  
13 highway or  $\leq 50$  meters from a major road; and those living away from major roads.  
14  
15  
16  
17  
18  
19

### 20 *Air Pollution Exposure Assessment*

21  
22 The air pollution exposure assessment has been described in detail elsewhere.<sup>29-31</sup> High-resolution (10 meters) land-use  
23  
24 regression (LUR) models were developed in the study region to estimate annual average concentrations for four major traffic-related  
25  
26 air pollutants, including black carbon, PM<sub>2.5</sub>, NO<sub>2</sub>, and NO. The performance of the models was evaluated using the coefficient of  
27  
28 determination ( $R^2$ ) and estimated mean error ( $\pm$  SD) from leave-one-out cross validation analysis (black carbon:  $R^2 = 0.56$ , mean error  
29  
30 =  $0 \pm 0.23 \times 10^{-5}/m$ ; PM<sub>2.5</sub>:  $R^2 = 0.52$ , mean error =  $0 \pm 1.50 \mu g/m^3$ ; NO<sub>2</sub>:  $R^2 = 0.56$ , mean error =  $0 \pm 5.2 \mu g/m^3$ ; NO:  $R^2 = 0.62$ , mean  
31  
32 error =  $2.02 \pm 15.5 \mu g/m^3$ ). The predictors and performance of these LUR models have been discussed in detail previously.<sup>24</sup> The LUR  
33  
34 models were developed in 2003, and we have recently shown that the spatial patterns of traffic-related air pollution in Vancouver  
35  
36  
37  
38  
39  
40  
41  
42  
43  
44  
45  
46  
47  
48  
49

1  
2  
3 remained stable between 2003 and 2010.<sup>32</sup> The air pollution data were assigned to participants through their baseline residential  
4  
5 addresses to approximate individual exposure to these traffic-related air pollutants.  
6  
7

### 10 **Carotid Artery Atherosclerosis Assessment**

11  
12 The assessment method for carotid artery atherosclerosis has been described in detail elsewhere.<sup>27 33</sup> High-resolution B-mode  
13  
14 ultrasonography equipped with a 10-MHz linear array transducer was used. A uniform length of 10 mm in the far wall of the common  
15  
16 carotid artery within 2 cm proximal to the carotid bulb was selected for manual measurement of intima-media thickness (IMT). In the  
17  
18 selected area, the largest IMT without focal lesions was measured; the average of the largest IMT in the left and right carotid arteries  
19  
20 was calculated as a person's carotid IMT (CIMT). A plaque was defined as any focal protrusion above the surrounding intima; plaque  
21  
22 number was counted in each carotid segment including common, internal, external carotid arteries, and carotid bulb for two carotid  
23  
24 arteries. The area of a single plaque was calculated as the average lesion thickness (mm) multiplied by the lesion length (mm); and  
25  
26 plaque area was calculated as the sum of the area for each plaque (mm<sup>2</sup>). Total area (mm<sup>2</sup>) was calculated as the sum of plaque area  
27  
28 and IMT area measured in the left and right carotid arteries; IMT area (mm<sup>2</sup>) was calculated as the average IMT (mm) multiplied by  
29  
30 the length (20 mm) over which the IMT was measured. These four atherosclerosis markers were included as outcome variables in the  
31  
32 current study, because they are related to cardiovascular risk factors and are able to predict future cardiovascular events.<sup>5-7 33 34</sup>  
33  
34  
35  
36  
37  
38  
39  
40  
41  
42  
43  
44  
45  
46  
47  
48  
49

1  
2  
3 To evaluate the reproducibility of the measurement, 192 randomly selected participants from the cohort had the measurements  
4 repeated by different technicians. The average difference between two measurements was 0.3  $\mu\text{m}$  for CIMT, 0.39  $\text{mm}^2$  for plaque area,  
5 and 0.13  $\text{mm}^2$  for total area. The differences were small and not statistically significant.  
6  
7  
8

### 9 10 11 12 **Potential Confounding Factors** 13

14  
15 The following were important cardiovascular risk factors and were regarded as potential confounding factors in our analyses:  
16 age, sex (male, or female), ethnicity (Aboriginal, Chinese, European, or South Asian), BMI, cigarette smoking status (never, former, or  
17 current smoker), educational attainment ( $\leq$  high school, or  $>$ high school), annual household income ( $<$  \$30,000; \$30,000 to \$60,000; or  
18  $\geq$  \$60,000), leisure time physical activity (hours per week), systolic blood pressure (SBP), diastolic blood pressure (DBP), low-density  
19 lipoprotein cholesterol (LDL-C), high-density lipoprotein cholesterol (HDL-C), and total cholesterol. In the analysis for traffic-related  
20 air pollutants, community noise was also treated as a potential confounding factor.<sup>25</sup>  
21  
22  
23  
24  
25  
26  
27  
28

29 The demographic and behavioral risk factors were collected through standard questionnaires, which were administered by  
30 trained interviewers. Leisure time physical activity was estimated based on average minutes each week spent in physical activity  
31 during the previous year. Blood pressure was measured using an automated oscillometric office blood pressure monitor (VSM  
32 MedTech Ltd, Coquitlam, Canada). After 10 minutes of seated rest, five successive measurements were recorded; average SBP and  
33 DBP were calculated by averaging these five readings. Meanwhile, fasting blood samples were collected to measure LDL-C, HDL-C,  
34  
35  
36  
37  
38  
39  
40  
41  
42  
43  
44  
45

1  
2  
3 and total cholesterol using standard enzymatic procedures in the same clinical laboratory.<sup>27</sup> Residential exposure to community noise  
4 (annual day-evening-night A-weighted equivalent continuous noise levels,  $L_{den}$  dB(A)) was estimated based on baseline residential  
5 addresses and surrounding transportation information including road width, speed limits, traffic volume, and fleet composition.<sup>35</sup>  
6  
7

8  
9  
10 Neighborhood socioeconomic status was assessed using neighborhood income quintiles and neighborhood education quintiles  
11 derived from the 2006 Statistics Canada Census data. Neighborhood income quintiles were calculated using the medians of household  
12 income in the dissemination areas of the study region. Neighborhood education quintiles were calculated using the percentages of  
13 people with certificate, diploma, or degree in the dissemination areas of the study region.<sup>23</sup>  
14  
15  
16  
17  
18  
19  
20  
21

## 22 **Statistical Analyses**

23  
24 Baseline characteristics of participants were compared between the group living close to and the group living away from major  
25 roads using a Chi-squared test for categorical variables, two-sample t-test for normally distributed continuous variables, and Wilcoxon  
26 two-sample test for skewed continuous variables. Correlations between pollutants were examined using Spearman's rank correlation  
27 analysis.  
28  
29  
30  
31  
32  
33

34 General linear models were used to compare carotid atherosclerosis levels between these two groups. Annual change for each  
35 atherosclerosis marker during the follow-up period was calculated as the difference between these two measurements (end of follow-up  
36 minus baseline) divided by the number of years of follow-up. Adjusted differences of atherosclerosis levels between these two groups  
37  
38  
39  
40  
41

1  
2  
3 were calculated using the group living away from major roads as the reference category. In addition, we performed two sensitivity  
4  
5 analyses for progression of atherosclerosis. First, we repeated the above analyses for participants with increased severity of  
6  
7 atherosclerosis indicated by each atherosclerosis marker (annual change > 0). Second, we used the 85th percentile of annual change of  
8  
9 each atherosclerosis marker as the cutoff point to identify participants with greater progression of atherosclerosis (events). The Cox  
10  
11 proportional hazard models were used to calculate relative risks of having greater progression of atherosclerosis for participants living  
12  
13 close to major roads compared with those living away from major roads. In the Cox models, person-years were calculated for each  
14  
15 participant from the date of baseline examination to the date of follow-up examination.  
16  
17  
18

19  
20 To examine independent associations between residential traffic proximity and carotid artery atherosclerosis, statistical  
21  
22 analyses were performed to control for various potential confounding variables through four models: model 1 was a crude unadjusted  
23  
24 model; model 2 was adjusted for age (continuous), sex, and ethnicity; model 3 was further adjusted for BMI (continuous), smoking  
25  
26 status, leisure time physical activity (continuous), educational attainment, and annual household income in addition to the covariates  
27  
28 included in model 2; model 4 was further adjusted for SBP (continuous), LDL-C (continuous), HDL-C (continuous), neighborhood  
29  
30 income quintiles, and neighborhood education quintiles in addition to the covariates included in model 3. In the analyses for the  
31  
32 associations between traffic-related air pollutants and progression of carotid artery atherosclerosis, we calculated differences of annual  
33  
34 changes for each atherosclerosis marker in relation to an interquartile range elevation in each traffic-related air pollutant after  
35  
36 adjustment for community noise and those covariates included in model 4.  
37  
38  
39  
40  
41  
42  
43  
44  
45  
46  
47  
48  
49



1  
2  
3 All statistical tests were 2-sided and were performed using SAS, version 9.3 (SAS Institute Inc., Cary, NC, USA).  
4

## 5 **RESULTS**

6  
7  
8 A total of 829 participants were recruited at baseline. 13 individuals did not perform the carotid ultrasound examination, and 56  
9  
10 individuals did not provide accurate residential addresses and thus could not be geocoded; these individuals were excluded, leaving  
11  
12 760 participants (92% of those recruited) with complete data at baseline. Among these participants, 509 completed the follow-up, with  
13  
14 a follow-up rate of 67%, median follow-up time of 5.4 years (range 3.7–7.2 years). Compared with those lost to follow-up, participants  
15  
16 who completed follow-up had higher socioeconomic status (e.g., better education, higher annual household income) and better health  
17  
18 profiles (e.g., more never smokers, lower BMI and waist circumference); however, there were no significant differences between the  
19  
20 two groups in the baseline carotid artery atherosclerosis (see etable 1 and etable 2 in the Online Appendix).  
21  
22  
23

24  
25 Baseline annual average concentrations of traffic-related air pollutants and annual average levels of community noise are  
26  
27 summarized in table 1. Overall, air pollution and community noise levels were not strongly correlated; also, air pollutants were not  
28  
29 strongly correlated with each other, with the exception of NO and NO<sub>2</sub> (table 1). These results are consistent with those of our previous  
30  
31 studies performed in the study region.  
32  
33

34  
35 At baseline, 117 (23%) participants lived close to major roads. As expected, compared with those living away from major roads,  
36  
37 participants living close to major roads were exposed to higher levels of traffic-related air pollutants and community noise (table 1);  
38  
39 furthermore, these participants had lower annual household income, were more likely to be Aboriginal and less likely to be of South  
40  
41  
42  
43  
44  
45

1  
2  
3 Asian origin. There were no substantial differences between these two groups with respect to age, sex, education, BMI, smoking status,  
4  
5 alcohol intake, physical activity, blood pressure, and blood lipids (table 2).  
6  
7

8 At baseline, compared with those living away from major roads, participants living close to major roads had similar levels of  
9  
10 carotid atherosclerosis measured by CIMT, plaque area, plaque number, and total area. After adjustment for various potential  
11  
12 confounding factors in models 2-4, there were no significant differences between these two groups in these atherosclerosis markers  
13  
14 (table 3).  
15  
16

17 After five years of follow-up, atherosclerosis levels were increased for most participants (see etable 3 in the Online Appendix).  
18  
19 Overall, the mean values of annual changes for these atherosclerosis markers were similar between these two groups; the differences in  
20  
21 annual changes of these markers between these two groups were small and not statistically significant after adjustment for various  
22  
23 potential confounding factors in models 2-4 (table 4). When the analyses were repeated for participants with increased atherosclerosis  
24  
25 indicated by each single marker, the results were similar to those presented in table 4 (see etable 4 in the Online Appendix); when the  
26  
27 85th percentile of annual change of each marker was used to identify participants with greater progression, the risk of having greater  
28  
29 progression was not significantly different between these two groups (see etable 5 in the Online Appendix). Similarly, there were no  
30  
31 significant associations between annual changes in these atherosclerosis markers and traffic-related air pollutants, including black  
32  
33 carbon, PM<sub>2.5</sub>, NO<sub>2</sub>, and NO, after adjustment for various potential confounding factors including residential exposure to community  
34  
35 noise (table 5). There were no substantial differences between the results from the final models with and without community noise.  
36  
37  
38  
39  
40  
41  
42  
43  
44  
45  
46  
47  
48  
49

1  
2  
3 The stratified analyses show that atherosclerosis effects associated with exposure to road traffic were stronger for participants  
4 with the following characteristics: male, Chinese and South Asian background, higher family income, obesity, and never smokers  
5 (table 6). The results for some strata (e.g., age  $\geq$  60 years) were not completely consistent across different atherosclerosis markers.  
6  
7  
8  
9

## 10 11 12 **DISCUSSION**

13  
14  
15 In this longitudinal study with over five years of follow-up, we did not find significant associations between residential  
16 exposure to traffic-related air pollution and carotid artery atherosclerosis in either cross-sectional or longitudinal analyses. Our results  
17 were largely consistent for various markers of carotid artery atherosclerosis including CIMT, plaque area, plaque number, and total  
18 area and for various traffic exposure indicators including residential traffic proximity, black carbon, PM<sub>2.5</sub>, NO<sub>2</sub>, and NO. This study  
19 has several strengths including its longitudinal study design, the relatively long follow-up period, multiple markers of carotid artery  
20 atherosclerosis, various traffic exposure indicators, and control for various potential confounding factors in the statistical analyses.  
21  
22  
23  
24  
25  
26  
27  
28

29 As measurement error in the ultrasound examination of carotid atherosclerosis might have prevented detection of very subtle  
30 effects of air pollution on carotid atherosclerosis, we performed two sensitivity analyses by restricting analyses to participants with  
31 increased atherosclerosis and by using the 85th percentile of annual change of each marker to identify participants with greater  
32 progression of atherosclerosis. The results of these sensitivity analyses are similar to those observed in the main analyses, suggesting  
33 that the null associations were less likely due to measurement error in atherosclerosis assessment. For those covariates included in the  
34  
35  
36  
37  
38  
39  
40  
41  
42  
43  
44  
45  
46  
47  
48  
49

1  
2  
3 final models, age, sex, race, and LDL-C levels were each significantly associated with progression of carotid artery atherosclerosis  
4 indicated by plaque area, plaque number, and total area. There were no significant associations of carotid artery atherosclerosis with  
5 BMI, smoking, physical activity, or blood pressure. Notably, we did not find any significant associations of CIMT with established  
6 cardiovascular risk factors. As mentioned before, our study participants were young (30-65 years) and healthy (e.g., they did not have  
7 comorbid conditions); these factors might partly explain the null associations.  
8  
9

10  
11  
12  
13  
14  
15 Compared with the two recent longitudinal studies (see table 6 in the Online Appendix) by Adar *et al*<sup>16</sup> and Kunzli *et al*,<sup>17</sup> our  
16 study is different in the following four aspects: (1) on average, our participants were more than 10 years younger (baseline mean age  
17 47 years versus 62 and 59 years); (2) the study region had lower levels and smaller contrasts of ambient PM<sub>2.5</sub> (baseline annual mean  
18 concentration 4.1 µg/m<sup>3</sup> versus 16.6 and 27.8 µg/m<sup>3</sup>; interquartile range 1.4 µg/m<sup>3</sup> versus 2.5 and 1.7 µg/m<sup>3</sup>). (3) our participants did  
19 not have comorbid conditions such as diabetes and hypertension at baseline; and (4) the current study took into account the potential  
20 influences of community noise on the associations between traffic-related air pollutants and progression of carotid artery  
21 atherosclerosis. These differences may partly explain the null associations in our study. Overall, our baseline CIMT (673 ± 122 µm)  
22 and annual change in CIMT (9.2 ± 12.1 µm/yr) were comparable with those by Adar *et al* (678 ± 189 µm, 14.0 ± 53.0 µm/yr),<sup>16</sup> but  
23 were quite different from those of Kunzli *et al* (780 ± 150 µm, 2.0 ± 12.9 µm/yr);<sup>17</sup> perhaps because the former is based upon a multi-  
24 ethnic sample, similar to our study; whereas the latter was based on the data from five clinical trials in which the interventions might  
25 have played a role in reducing progression of carotid artery atherosclerosis.  
26  
27  
28  
29  
30  
31  
32  
33  
34  
35  
36  
37  
38  
39  
40  
41  
42  
43  
44  
45  
46  
47  
48  
49

1  
2  
3 It should be noted that the findings of the two recent longitudinal studies were not entirely consistent.<sup>16,17</sup> Adar *et al* found that  
4 a 2.5  $\mu\text{g}/\text{m}^3$  increase in  $\text{PM}_{2.5}$  was associated with a 5.0  $\mu\text{m}$  (95% CI, 2.6 to 7.4  $\mu\text{m}$ ) annual increase in CIMT; however, the association  
5 was observed for within- but not between-city contrasts.<sup>16</sup> Kunzli *et al* reported that a 10  $\mu\text{g}/\text{m}^3$  elevation in  $\text{PM}_{2.5}$  was associated with  
6 a non-significant 2.5  $\mu\text{m}$  (95% CI, -0.3 to 5.4  $\mu\text{m}$ ) annual increase in CIMT; however, living close to a major roadway was associated  
7 with a 5.5  $\mu\text{m}$  (95% CI, 0.13-10.79  $\mu\text{m}$ ) annual increase in CIMT compared with those living away from a major roadway.<sup>17</sup> In  
8 addition, the findings of previous cross-sectional studies were also not consistent. Kunzli *et al* reported a positive but non-significant  
9 association between  $\text{PM}_{2.5}$  and CIMT using the baseline data from two clinical trials in Los Angeles.<sup>11</sup> Based on the MESA Air  
10 baseline data, Diez Roux *et al* found that  $\text{PM}_{2.5}$  was associated with CIMT, but no significant association was observed with coronary  
11 artery calcification;<sup>12</sup> Allen *et al* found that aortic calcification was associated with  $\text{PM}_{2.5}$  among participants with long-term residence,  
12 but no significant association was observed with residential traffic proximity.<sup>13</sup> Based on the baseline data from a Germany study  
13 conducted in Ruhr area, Hoffmann *et al* found that traffic proximity, but not  $\text{PM}_{2.5}$ , was associated with coronary artery calcification;<sup>14</sup>  
14 whereas Bauer *et al* found that  $\text{PM}_{2.5}$ , but not traffic proximity, was associated with CIMT.<sup>15</sup> Using data from the Atherosclerosis Risk  
15 in Young Adults study, Lenters *et al* did not find any associations of CIMT with air pollutants ( $\text{PM}_{2.5}$ , black smoke,  $\text{NO}_2$ ,  $\text{SO}_2$ ) and  
16 traffic indicators (traffic proximity, traffic density).<sup>36</sup> In a randomized, double-blind, placebo-controlled trial on the association  
17 between cigarette smoking and progression of CIMT, Johnson *et al* did not find a significant association between cigarette smoking  
18 and progression of CIMT.<sup>37</sup> Recently, in a panel study with 380 participants, Wilker *et al* found that a 0.26  $\mu\text{g}/\text{m}^3$  (interquartile range)  
19  
20  
21  
22  
23  
24  
25  
26  
27  
28  
29  
30  
31  
32  
33  
34  
35  
36  
37  
38  
39  
40  
41  
42  
43  
44  
45  
46  
47  
48  
49

1  
2  
3 increase in black carbon concentrations was associated with a 1.1% increase in CIMT (95% CI, 0.4-1.7%).<sup>38</sup> Also, several recent cross-  
4  
5 sectional studies have consistently found significant associations of CIMT with biomass fuel<sup>39</sup> and traffic-related air pollution.<sup>40 41</sup> In  
6  
7 the current study, we did not find significant associations of CIMT or other atherosclerosis markers with traffic proximity and traffic-  
8  
9 related air pollution. The findings of these studies suggest that inconsistencies are existent within and between different studies on the  
10  
11 relationship between ambient air pollution and severity of atherosclerosis, and that CIMT is not necessarily an ideal marker to reflect  
12  
13 adverse cardiovascular effects associated with environmental exposure.  
14  
15

16  
17 There are some limitations in our study that might have potentially affected the study results. Residential proximity to road  
18  
19 traffic is a convenient but crude surrogate for residential exposure to traffic-related air pollution. First, geocoding of residential  
20  
21 addresses in a GIS might have introduced positional error.<sup>42</sup> Given the sharp concentration gradients of traffic-related air pollution near  
22  
23 major roads, the positional error might have introduced some exposure misclassification. Second, residential traffic proximity did not  
24  
25 take into account environmental factors that might have affected actual residential exposure such as wind direction, street canyons,<sup>43</sup>  
26  
27 housing characteristics,<sup>44</sup> and indoor infiltration of air pollutants.<sup>45</sup> Third, although residential exposure is able to reasonably reflect  
28  
29 personal exposure,<sup>46 47</sup> individual factors such as time spent in home, outdoor activity, and occupational exposure might have affected  
30  
31 actual personal exposure. Fourth, our exposure assessment was based on participants' baseline residential addresses, we did not have  
32  
33 residential history information during the follow-up period. Exposure misclassification might have occurred for those who changed  
34  
35 their residences and therefore their exposure status. Overall, all these factors would be expected to cause nondifferential exposure  
36  
37  
38  
39  
40  
41  
42  
43  
44  
45

1  
2  
3 misclassification, reducing our ability to uncover the true relationship between traffic-related air pollution and carotid artery  
4  
5 atherosclerosis.  
6  
7

8 Loss to follow-up was another limitation of the current study. 33% of participants were lost to follow-up, leaving a relatively  
9  
10 small sample of 509 individuals. Overall, participants who completed follow-up had higher socioeconomic status and better health  
11  
12 profiles compared with those lost to follow-up. Therefore loss to follow-up, in combination with the relatively small sample size, might  
13  
14 potentially contribute to the null associations in our study. Finally, after the first ultrasound examination of carotid atherosclerosis, it  
15  
16 was possible that some participants might have taken medications (e.g., statins) that were able to reduce progression of  
17  
18 atherosclerosis.<sup>48</sup> We did not have information on medication use during the follow-up period. Nevertheless, as mentioned before, we  
19  
20 did exclude persons who took relevant medications at baseline. Also, this was a group of healthy people who did not have  
21  
22 cardiovascular diseases or comorbid conditions. Therefore, they were less likely to take medications such as statins during the follow-  
23  
24 up period.  
25  
26  
27  
28

29 Furthermore, this study has a smaller sample size compared with two recently reported cohort studies.<sup>16 17</sup> However, some  
30  
31 previous studies with small sample sizes are still able to detect significant associations of CIMT with black carbon (N = 380)<sup>38</sup> and  
32  
33 residential traffic proximity (N = 777 in a subgroup).<sup>17</sup> Based on these studies, it was possible for our study (N = 509) to detect a  
34  
35 significant association between traffic-related air pollution and carotid artery atherosclerosis if the association was really existent in the  
36  
37 population.  
38  
39  
40  
41

1  
2  
3 As discussed before, in the study region, the air pollution levels were low (annual mean PM<sub>2.5</sub> concentration 4.1 µg/m<sup>3</sup>) and the  
4 exposure contrast was relatively small (interquartile range 1.4 µg/m<sup>3</sup>), which may have played an important role in the null associations  
5 with atherosclerosis markers. Finally, the measurement of CIMT was based on the average of the largest intima-media thickness  
6 without focal lesions in the specified areas. Because the largest thickness area at baseline might potentially progress to become a focal  
7 lesion during the follow-up period, the second CIMT measure at the end of follow-up might be smaller than the baseline measure,  
8 leading to artificially decreased CIMT. Nevertheless, this is not a major problem because other larger thickness area at baseline might  
9 potentially progress to become the largest intima-media thickness without focal lesions at the end of follow-up. Also, this type of  
10 progression of atherosclerosis could be reflected by plaque number, plaque area, and total area.  
11  
12  
13  
14  
15  
16  
17  
18  
19  
20  
21

22 The stratified analyses (Table 6) show considerable heterogeneity in effect estimates across different atherosclerosis markers.  
23 Because of very small sample sizes in these subgroups, it is difficult to determine whether the heterogeneity was due to chance (small  
24 sample size) or reflected real effects. Nevertheless, it was notable that the obese group (versus the non-obese group), the never-  
25 smoking group (versus current/former smoking group), and Chinese or South Asian background (versus European background)  
26 consistently had larger effect estimates across different atherosclerosis markers.  
27  
28  
29  
30  
31  
32  
33

34 As previously mentioned, in a population-based cohort study conducted in the same study region and using the same exposure  
35 metrics,<sup>23</sup> we found that residential proximity to road traffic was associated with an increased risk of CHD mortality, whereas changes  
36 in traffic proximity were associated with altered risk of coronary mortality within a relatively short period of time. Moving closer to  
37  
38  
39  
40  
41  
42  
43  
44  
45



1  
2  
3 major roads was associated with increased risk, whereas moving away from major roads was associated with decreased risk. These  
4  
5 previous findings, in conjunction with the null associations between traffic proximity and carotid artery atherosclerosis in the current  
6  
7 study, indicate that triggering of acute cardiac events might play an important role in the associations between traffic-related air  
8  
9 pollution and cardiovascular outcomes.  
10  
11

## 12 13 14 15 **CONCLUSIONS**

16  
17 In this five-year longitudinal study, we did not find significant associations between residential exposure to traffic-related air  
18  
19 pollution and progression of carotid artery atherosclerosis in a region with relatively low levels and small contrasts of air pollution.  
20  
21 Because the findings of previous studies are not fully consistent, more research is needed to determine the relationship between long-  
22  
23 term exposure to traffic-related air pollution and progression of atherosclerosis.  
24  
25  
26  
27  
28  
29  
30  
31  
32  
33  
34  
35  
36  
37  
38  
39  
40  
41  
42  
43  
44  
45  
46  
47  
48  
49

**Table 1.** Baseline average concentrations of traffic-related air pollutants, average levels of community noise, and correlation coefficients<sup>a</sup>

| Pollutant                              | Mean (SD)<br>(close to<br>major roads) <sup>b</sup> | Mean (SD)<br>(away from<br>major roads) <sup>c</sup> | Mean (SD)   | Median | IQR       | Range     | Correlation coefficient |                   |                 |      |       |
|----------------------------------------|-----------------------------------------------------|------------------------------------------------------|-------------|--------|-----------|-----------|-------------------------|-------------------|-----------------|------|-------|
|                                        |                                                     |                                                      |             |        |           |           | BC                      | PM <sub>2.5</sub> | NO <sub>2</sub> | NO   | Noise |
| BC (10 <sup>-5</sup> /m) <sup>d</sup>  | 3.03 (1.60)                                         | 1.24 (0.71)                                          | 1.65 (1.24) | 1.08   | 0.89-1.90 | 0.0-5.00  | 1.00                    | --                | --              | --   | --    |
| PM <sub>2.5</sub> (µg/m <sup>3</sup> ) | 4.27 (1.54)                                         | 4.03 (1.42)                                          | 4.08 (1.45) | 4.09   | 3.40-4.81 | 0.0-10.00 | 0.13                    | 1.00              | --              | --   | --    |
| NO <sub>2</sub> (µg/m <sup>3</sup> )   | 19.1 (4.2)                                          | 16.6 (3.9)                                           | 17.2 (4.1)  | 16.5   | 14.6-18.7 | 7.9-30.0  | 0.38                    | 0.45              | 1.00            | --   | --    |
| NO (µg/m <sup>3</sup> )                | 39.0 (15.7)                                         | 24.1 (6.7)                                           | 27.6 (11.4) | 24.9   | 20.5-31.3 | 8.4-100.0 | 0.51                    | 0.43              | 0.73            | 1.00 | --    |
| Noise (dB(A))                          | 73.9 (6.2)                                          | 65.4 (5.3)                                           | 67.4 (6.6)  | 65.3   | 63.2-71.8 | 37.1-83.4 | 0.40                    | 0.19              | 0.28            | 0.41 | 1.00  |

Abbreviations: BC, black carbon; IQR, interquartile range; NO, nitric oxide; NO<sub>2</sub>, nitrogen dioxide; PM<sub>2.5</sub>, particulate matter < 2.5 µm in aerodynamic diameter; SD, standard deviation.

<sup>a</sup>The results are derived from all participants, unless otherwise specified.

<sup>b</sup>For participants living close to major roads.

<sup>c</sup>For participants living away from major roads.

<sup>d</sup>10<sup>-5</sup>/m black carbon ≈ 0.8 µg/m<sup>3</sup> elemental carbon.

**Table 2.** Baseline characteristics of participants stratified by traffic proximity<sup>a</sup>

| Characteristic                                  | All participants (n = 509) | Close to major roads (n = 117) | Away from major roads (n = 392) | P value <sup>b</sup> |
|-------------------------------------------------|----------------------------|--------------------------------|---------------------------------|----------------------|
| Age (year)                                      | 46.8 ± 9.0                 | 47.2 ± 9.2                     | 46.7 ± 8.9                      | 0.581                |
| Sex, male (%)                                   | 49                         | 51                             | 49                              | 0.593                |
| Race (%)                                        |                            |                                |                                 | 0.008                |
| Aboriginal                                      | 14                         | 22                             | 12                              |                      |
| Chinese                                         | 30                         | 32                             | 29                              |                      |
| European                                        | 29                         | 27                             | 30                              |                      |
| South Asian                                     | 27                         | 19                             | 29                              |                      |
| Education (%)                                   |                            |                                |                                 | 0.589                |
| ≤ High school                                   | 27                         | 29                             | 27                              |                      |
| > High school                                   | 73                         | 71                             | 73                              |                      |
| Annual household income (%)                     |                            |                                |                                 | 0.019                |
| < \$30,000                                      | 24                         | 29                             | 22                              |                      |
| \$30,000 to \$60,000                            | 37                         | 43                             | 35                              |                      |
| ≥ \$60,000                                      | 39                         | 28                             | 43                              |                      |
| Smoke status (%)                                |                            |                                |                                 | 0.357                |
| Current                                         | 7                          | 9                              | 6                               |                      |
| Former                                          | 27                         | 24                             | 28                              |                      |
| Never                                           | 66                         | 67                             | 66                              |                      |
| Alcohol intake (yes, %)                         | 32                         | 30                             | 32                              | 0.649                |
| Physical activity <sup>c</sup> (hours per week) | 3.5<br>(1.7 – 6.5)         | 2.9<br>(1.6 – 6.5)             | 1.3<br>(0.9 – 1.8)              | 0.258                |
| Body mass index (kg/m <sup>2</sup> )            | 27.2 ± 4.7                 | 27.5 ± 4.3                     | 27.1 ± 4.8                      | 0.459                |
| SBP (mmHg)                                      | 118 ± 15                   | 117 ± 14                       | 118 ± 15                        | 0.357                |
| DBP (mmHg)                                      | 77 ± 9                     | 77 ± 10                        | 77 ± 9                          | 0.826                |
| Total cholesterol (mmol/L)                      | 5.2 ± 1.0                  | 5.2 ± 1.1                      | 5.3 ± 1.0                       | 0.667                |
| LDL-C (mmol/L)                                  | 3.2 ± 0.9                  | 3.2 ± 0.9                      | 3.3 ± 0.9                       | 0.311                |
| HDL-C (mmol/L)                                  | 1.3 ± 0.4                  | 1.3 ± 0.4                      | 1.3 ± 0.4                       | 0.637                |

Abbreviations: DBP, diastolic blood pressure; HDL-C, high-density lipoprotein cholesterol; LDL-C, low-density lipoprotein cholesterol; MET, metabolic equivalent of task; SBP, systolic blood pressure.

<sup>a</sup>Data are presented as percentage for categorical variables or mean ± SD for continuous variables; unless otherwise specified.

<sup>b</sup>For comparisons between the group close to and the group away from major roads.

<sup>c</sup>Median (interquartile range).

**Table 3.** Cross-sectional mean differences (95% CIs) in baseline carotid artery atherosclerosis between the group close to and the group away from major road (the reference category)

| Atherosclerosis                | Close to major roads (n = 117) <sup>a</sup> | Away from major roads (n = 392) <sup>a</sup> | Difference <sup>bc</sup> (model 1) | Difference <sup>bc</sup> (model 2) | Difference <sup>bc</sup> (model 3) | Difference <sup>bc</sup> (model 4) |
|--------------------------------|---------------------------------------------|----------------------------------------------|------------------------------------|------------------------------------|------------------------------------|------------------------------------|
| CIMT (μm)                      | 664 ± 125                                   | 673 ± 118                                    | -9.37<br>(-35.24 to 16.49)         | -12.78<br>(-35.32 to 9.76)         | -13.76<br>(-36.17 to 8.64)         | -8.7<br>(-31.15 to 13.75)          |
| Plaque area (mm <sup>2</sup> ) | 5.37 ± 8.10                                 | 6.62 ± 11.85                                 | -1.25<br>(-3.65 to 1.14)           | -1.62<br>(-3.89 to 0.66)           | -1.45<br>(-3.74 to 0.85)           | -0.88<br>(-3.19 to 1.43)           |
| Plaque number                  | 0.83 ± 0.93                                 | 0.90 ± 1.19                                  | -0.07<br>(-0.31 to 0.18)           | -0.12<br>(-0.36 to 0.12)           | -0.11<br>(-0.35 to 0.13)           | -0.05<br>(-0.29 to 0.19)           |
| Total area (mm <sup>2</sup> )  | 18.6 ± 9.0                                  | 20.1 ± 13.0                                  | -1.45<br>(-4.08 to 1.18)           | -1.88<br>(-4.3 to 0.54)            | -1.73<br>(-4.17 to 0.71)           | -1.07<br>(-3.51 to 1.38)           |

Abbreviation: CIMT, carotid intima-media thickness.

<sup>a</sup>Data are presented as mean ± standard deviation.

<sup>b</sup>Difference of least squares means between the group close to and the group away from major roads (the group away from major roads was the reference category).

<sup>c</sup>Model 1 was a crude unadjusted model; model 2 was adjusted for age, sex, and ethnicity; model 3 was further adjusted for BMI, smoking status, physical activity, education, and annual household income; model 4 was additionally adjusted for systolic blood pressure, LDL-C, HDL-C, neighborhood income levels, and neighborhood education levels.

**Table 4.** Mean differences (95% CIs) in annual changes of carotid artery atherosclerosis between the group close to and the group away from major road (the reference category)

| Atherosclerosis                     | Close to major roads (n = 117) <sup>a</sup> | Away from major roads (n = 392) <sup>a</sup> | Difference <sup>bc</sup> (model 1) | Difference <sup>bc</sup> (model 2) | Difference <sup>bc</sup> (model 3) | Difference <sup>bc</sup> (model 4) |
|-------------------------------------|---------------------------------------------|----------------------------------------------|------------------------------------|------------------------------------|------------------------------------|------------------------------------|
| CIMT (µm/year)                      | 8.93 ± 10.57                                | 9.41 ± 12.29                                 | -0.49<br>(-3.07 to 2.09)           | -1.01<br>(-3.62 to 1.61)           | -1.02<br>(-3.66 to 1.63)           | -0.78<br>(-3.49 to 1.92)           |
| Plaque area (mm <sup>2</sup> /year) | 1.35 ± 2.72                                 | 1.26 ± 2.25                                  | 0.09<br>(-0.42 to 0.6)             | 0.03<br>(-0.46 to 0.52)            | 0.03<br>(-0.46 to 0.53)            | 0.07<br>(-0.42 to 0.57)            |
| Plaque number (per year)            | 0.14 ± 0.21                                 | 0.13 ± 0.20                                  | 0.02<br>(-0.03 to 0.06)            | 0.01<br>(-0.03 to 0.05)            | 0.01<br>(-0.04 to 0.05)            | 0.01<br>(-0.04 to 0.05)            |
| Total area (mm <sup>2</sup> /year)  | 1.52 ± 2.79                                 | 1.43 ± 2.30                                  | 0.09<br>(-0.43 to 0.61)            | 0.03<br>(-0.47 to 0.53)            | 0.03<br>(-0.47 to 0.54)            | 0.08<br>(-0.43 to 0.59)            |

Abbreviation: CIMT, carotid intima-media thickness.

<sup>a</sup>Data are presented as mean ± standard deviation.

<sup>b</sup>Difference of least squares means between the group close to and the group away from major roads (the group away from major roads was the reference category).

<sup>c</sup>Model 1 was a crude unadjusted model; model 2 was adjusted for age, sex, and ethnicity; model 3 was further adjusted for BMI, smoking status, physical activity, education, and annual household income; model 4 was additionally adjusted for systolic blood pressure, LDL-C, HDL-C, neighborhood income levels, and neighborhood education levels.

**Table 5.** Changes in annual changes of carotid artery atherosclerosis associated with an IQR elevation in traffic-related air pollutants and community noise<sup>a</sup>

| Atherosclerosis                           | Black carbon<br>( $1.01 \times 10^{-5}/\text{m}$ ) <sup>b</sup> | PM <sub>2.5</sub><br>( $1.41 \mu\text{g}/\text{m}^3$ ) <sup>b</sup> | NO <sub>2</sub><br>( $4.07 \mu\text{g}/\text{m}^3$ ) <sup>b</sup> | NO<br>( $10.83 \mu\text{g}/\text{m}^3$ ) <sup>b</sup> | Noise<br>(8.69 dB(A)) <sup>bc</sup> |
|-------------------------------------------|-----------------------------------------------------------------|---------------------------------------------------------------------|-------------------------------------------------------------------|-------------------------------------------------------|-------------------------------------|
| CIMT ( $\mu\text{m}/\text{year}$ )        | -0.32<br>(-1.41 to 0.78)                                        | 0.20<br>(-0.99 to 1.39)                                             | -0.06<br>(-1.36 to 1.23)                                          | -1.07<br>(-2.47 to 0.32)                              | -0.66<br>(-2.44 to 1.12)            |
| Plaque area ( $\text{mm}^2/\text{year}$ ) | -0.08<br>(-0.28 to 0.12)                                        | 0.18<br>(-0.04 to 0.39)                                             | 0.07<br>(-0.17 to 0.31)                                           | 0.10<br>(-0.16 to 0.35)                               | 0.16<br>(-0.16 to 0.49)             |
| Plaque number (per year)                  | -0.00<br>(-0.02 to 0.02)                                        | 0.02<br>(-0.00 to 0.03)                                             | 0.01<br>(-0.01 to 0.03)                                           | 0.01<br>(-0.01 to 0.03)                               | 0.02<br>(-0.01 to 0.04)             |
| Total area ( $\text{mm}^2/\text{year}$ )  | -0.08<br>(-0.29 to 0.12)                                        | 0.17<br>(-0.05 to 0.40)                                             | 0.08<br>(-0.17 to 0.32)                                           | 0.08<br>(-0.18 to 0.34)                               | 0.17<br>(-0.16 to 0.50)             |

Abbreviations: CIMT, carotid intima-media thickness; IQR, interquartile range; NO, nitric oxide; NO<sub>2</sub>, nitrogen dioxide; PM<sub>2.5</sub>, particulate matter < 2.5  $\mu\text{m}$  in aerodynamic diameter;

<sup>a</sup>Adjusted for age, sex, ethnicity, BMI, smoking status, physical activity, education, annual household income, systolic blood pressure, LDL-C, HDL-C, neighborhood income levels, and neighborhood education levels. In the analysis for each air pollutant, community noise was included as a covariate; in the analysis for community noise, black carbon, PM<sub>2.5</sub>, and NO<sub>2</sub> were included as covariates.

<sup>b</sup>Interquartile range for the pollutant.

<sup>c</sup>Annual day-evening-night A-weighted equivalent continuous noise level.

**Table 6.** Mean differences (95% CIs) in annual changes of carotid artery atherosclerosis between the group close to and the group away from major road (the reference category)<sup>a</sup>

|                                            | CIMT ( $\mu\text{m}$ ) | Plaque area ( $\text{mm}^2$ )             | Plaque number              | Total area ( $\text{mm}^2$ )              |
|--------------------------------------------|------------------------|-------------------------------------------|----------------------------|-------------------------------------------|
| Age                                        |                        |                                           |                            |                                           |
| < 60 yr                                    | -0.76 (-3.59 to 2.08)  | 0.01 (-0.51 to 0.53)                      | 0.00 (-0.05 to 0.05)       | 0.02 (-0.51 to 0.56)                      |
| $\geq$ 60 yr                               | 1.38 (-11.27 to 14.02) | -0.18 (-2.53 to 2.17)                     | 0.02 (-0.18 to 0.23)       | -0.16 (-2.52 to 2.19)                     |
| Sex                                        |                        |                                           |                            |                                           |
| Men                                        | 1.29 (-2.81 to 5.39)   | 0.22 (-0.64 to 1.07)                      | 0.00 (-0.07 to 0.07)       | 0.24 (-0.63 to 1.12)                      |
| Women                                      | -1.97 (-5.69 to 1.75)  | -0.06 (-0.57 to 0.45)                     | 0.01 (-0.04 to 0.07)       | -0.07 (-0.59 to 0.45)                     |
| Race                                       |                        |                                           |                            |                                           |
| Aboriginal                                 | -2.41 (-9.48 to 4.66)  | 0.81 (-0.36 to 1.99) <sup>b</sup>         | 0.04 (-0.12 to 0.20)       | 0.77 (-0.43 to 1.97) <sup>b</sup>         |
| Chinese                                    | 0.89 (-4.67 to 6.45)   | <b>1.12 (0.21 to 2.03)<sup>b</sup></b>    | <b>0.08 (0.00 to 0.16)</b> | <b>1.21 (0.30 to 2.12)<sup>b</sup></b>    |
| European                                   | -2.80 (-7.97 to 2.37)  | <b>-1.86 (-3.06 to -0.65)<sup>b</sup></b> | -0.10 (-0.19 to 0.00)      | <b>-1.92 (-3.16 to -0.68)<sup>b</sup></b> |
| South Asian                                | 1.18 (-5.44 to 7.79)   | 0.29 (-0.53 to 1.12) <sup>b</sup>         | 0.02 (-0.07 to 0.1)        | 0.32 (-0.54 to 1.17) <sup>b</sup>         |
| Annual household income                    |                        |                                           |                            |                                           |
| < \$30,000                                 | -1.67 (-7.78 to 4.44)  | -0.07 (-0.98 to 0.85)                     | 0.04 (-0.04 to 0.12)       | -0.10 (-1.04 to 0.84)                     |
| \$30,000 to \$60,000                       | -2.86 (-6.84 to 1.11)  | -0.20 (-0.84 to 0.44)                     | -0.01 (-0.08 to 0.06)      | -0.19 (-0.84 to 0.45)                     |
| $\geq$ \$60,000                            | 1.99 (-3.39 to 7.37)   | 0.61 (-0.48 to 1.7)                       | 0.00 (-0.08 to 0.09)       | 0.65 (-0.47 to 1.77)                      |
| Education                                  |                        |                                           |                            |                                           |
| $\leq$ High school                         | 2.57 (-3.05 to 8.20)   | <b>-1.01 (-1.91 to -0.11)<sup>b</sup></b> | -0.05 (-0.13 to 0.04)      | <b>-0.92 (-1.82 to -0.02)</b>             |
| > High school                              | -1.60 (-4.81 to 1.61)  | 0.49 (-0.12 to 1.10) <sup>b</sup>         | 0.02 (-0.03 to 0.07)       | 0.46 (-0.17 to 1.09)                      |
| Obesity (BMI $\geq$ 30 kg/m <sup>2</sup> ) |                        |                                           |                            |                                           |
| No                                         | -1.24 (-4.34 to 1.85)  | -0.05 (-0.60 to 0.49)                     | 0.01 (-0.04 to 0.06)       | -0.04 (-0.60 to 0.51)                     |
| Yes                                        | 1.81 (-4.94 to 8.56)   | 0.60 (-0.81 to 2.00)                      | 0.05 (-0.06 to 0.17)       | 0.64 (-0.80 to 2.07)                      |
| Smoke status                               |                        |                                           |                            |                                           |
| Current                                    | -9.58 (-26.66 to 7.50) | -1.20 (-4.94 to 2.54)                     | -0.09 (-0.45 to 0.28)      | -1.41 (-5.29 to 2.47)                     |
| Former                                     | -1.92 (-7.89 to 4.05)  | -0.52 (-1.60 to 0.55)                     | -0.01 (-0.11 to 0.09)      | -0.56 (-1.66 to 0.54)                     |
| Never                                      | 0.30 (-3.14 to 3.73)   | 0.24 (-0.38 to 0.86)                      | 0.00 (-0.06 to 0.05)       | 0.27 (-0.36 to 0.90)                      |

<sup>a</sup>Stratified by each covariate, adjusted for all other covariates in the table, and also age, BMI, physical activity, systolic blood pressure, LDL-C, HDL-C, neighborhood income levels, and neighborhood education levels.

<sup>b</sup> $P < 0.05$  for the interaction term (traffic proximity and the categorical variable) in the final model.

1  
2  
3 **Contributors:** All authors contributed to the study conception and design. SAL, MB, RWA,  
4  
5 HWD, GBM contributed to the data collection. WQG analyzed the data and was responsible for  
6  
7 the accuracy of the data analysis. WQG wrote the first draft of the manuscript, all authors  
8  
9 critically revised the manuscript for important intellectual content. All authors have read and  
10  
11 approved the final version of the manuscript.  
12  
13

14  
15 **Funding:** This research received no specific grant from any funding agency in the public,  
16  
17 commercial or not-for-profit sectors.  
18

19  
20 **Competing interests:** None.  
21

22 **Ethics approval:** The study protocol was approved by the Simon Fraser University Research  
23  
24 Ethics Board, and all participants provided informed consent.  
25  
26

27 **Provenance and peer review:** Not commissioned; externally peer reviewed.  
28

29 **Data sharing statement:** No additional data are available.  
30  
31  
32  
33  
34  
35  
36  
37  
38  
39  
40  
41  
42  
43  
44  
45  
46  
47  
48  
49  
50  
51  
52  
53  
54  
55  
56  
57  
58  
59  
60



## REFERENCES

- 1 Brook RD, Rajagopalan S, Pope CA, 3rd et al. Particulate matter air pollution and cardiovascular disease: An update to the scientific statement from the American Heart Association. *Circulation* 2010;121:2331-78.
- 2 Lusis AJ. Atherosclerosis. *Nature* 2000;407:233-41.
- 3 Libby P, Theroux P. Pathophysiology of coronary artery disease. *Circulation* 2005;111:3481-8.
- 4 Ross R. The pathogenesis of atherosclerosis: a perspective for the 1990s. *Nature* 1993;362:801-9.
- 5 Chambless LE, Heiss G, Folsom AR et al. Association of coronary heart disease incidence with carotid arterial wall thickness and major risk factors: the Atherosclerosis Risk in Communities (ARIC) Study, 1987-1993. *Am J Epidemiol* 1997;146:483-94.
- 6 Stein JH, Korcarz CE, Hurst RT et al. Use of carotid ultrasound to identify subclinical vascular disease and evaluate cardiovascular disease risk: a consensus statement from the American Society of Echocardiography Carotid Intima-Media Thickness Task Force. Endorsed by the Society for Vascular Medicine. *J Am Soc Echocardiogr* 2008;21:93-111; quiz 189-90.
- 7 Chambless LE, Folsom AR, Clegg LX et al. Carotid wall thickness is predictive of incident clinical stroke: the Atherosclerosis Risk in Communities (ARIC) study. *Am J Epidemiol* 2000;151:478-87.
- 8 Kunzli N, Perez L, von Klot S et al. Investigating air pollution and atherosclerosis in humans: concepts and outlook. *Prog Cardiovasc Dis* 2011;53:334-43.
- 9 Sun Q, Wang A, Jin X et al. Long-term air pollution exposure and acceleration of atherosclerosis and vascular inflammation in an animal model. *JAMA* 2005;294:3003-10.
- 10 Suwa T, Hogg JC, Quinlan KB, et al. Particulate air pollution induces progression of atherosclerosis. *J Am Coll Cardiol* 2002;39:935-42.
- 11 Kunzli N, Jerrett M, Mack WJ et al. Ambient air pollution and atherosclerosis in Los Angeles. *Environ Health Perspect* 2005;113:201-6.
- 12 Diez Roux AV, Auchincloss AH, Franklin TG et al. Long-term exposure to ambient particulate matter and prevalence of subclinical atherosclerosis in the Multi-Ethnic Study of Atherosclerosis. *Am J Epidemiol* 2008;167:667-75.
- 13 Allen RW, Criqui MH, Diez Roux AV et al. Fine particulate matter air pollution, proximity to traffic, and aortic atherosclerosis. *Epidemiology* 2009;20:254-64.
- 14 Hoffmann B, Moebus S, Mohlenkamp S et al. Residential exposure to traffic is associated with coronary atherosclerosis. *Circulation* 2007;116:489-96.
- 15 Bauer M, Moebus S, Mohlenkamp S et al. Urban particulate matter air pollution is associated with subclinical atherosclerosis: results from the HNR (Heinz Nixdorf Recall) study. *J Am Coll Cardiol* 2010;56:1803-8.
- 16 Adar SD, Sheppard L, Vedal S et al. Fine particulate air pollution and the progression of carotid intima-medial thickness: a prospective cohort study from the multi-ethnic study of atherosclerosis and air pollution. *PLoS Med* 2013;10:e1001430.

- 1  
2  
3 17 Kunzli N, Jerrett M, Garcia-Esteban R et al. Ambient air pollution and the progression of  
4 atherosclerosis in adults. *PLoS One* 2010;5:e9096.  
5  
6 18 Brook RD, Franklin B, Cascio W et al. Air pollution and cardiovascular disease: a  
7 statement for healthcare professionals from the Expert Panel on Population and  
8 Prevention Science of the American Heart Association. *Circulation* 2004;109:2655-71.  
9  
10 19 Health Effects Institute. Traffic-Related Air Pollution. A Critical Review of the Literature  
11 on Emissions, Exposure, and Health Effects 2010.  
12  
13 20 Zhu Y, Hinds WC, Kim S, et al. Concentration s C and size distribution of ultrafine  
14 particles near a major highway. *J Air Waste Manag Assoc* 2002;52:1032-42.  
15  
16 21 Zhou Y, Levy JI. Factors influencing the spatial extent of mobile source air pollution  
17 impacts: a meta-analysis. *Bmc Public Health* 2007;7:89.  
18  
19 22 Jerrett M, Arain A, Kanaroglou P et al. A review and evaluation of intraurban air  
20 pollution exposure models. *J Expo Anal Environ Epidemiol* 2005;15:185-204.  
21  
22 23 Gan WQ, Tamburic L, Davies HW, et al. Changes in residential proximity to road traffic  
23 and the risk of death from coronary heart disease. *Epidemiology* 2010;21:642-9.  
24  
25 24 Gan WQ, Koehoorn M, Davies HW, et al. Long-term exposure to traffic-related air  
26 pollution and the risk of coronary heart disease hospitalization and mortality. *Environ*  
27 *Health Perspect* 2011;119:501-7.  
28  
29 25 Gan WQ, Davies HW, Koehoorn M, et al. Association of long-term exposure to  
30 community noise and traffic-related air pollution with coronary heart disease mortality.  
31 *Am J Epidemiol* 2012;175:898-906.  
32  
33 26 Lear SA, Birmingham CL, Chockalingam A, et al. Study design of the Multicultural  
34 Community Health Assessment Trial (M-CHAT): a comparison of body fat distribution in  
35 four distinct populations. *Ethn Dis* 2006;16:96-100.  
36  
37 27 Lear SA, Humphries KH, Kohli S, et al. Visceral adipose tissue, a potential risk factor for  
38 carotid atherosclerosis: results of the Multicultural Community Health Assessment Trial  
39 (M-CHAT). *Stroke* 2007;38:2422-9.  
40  
41 28 Brauer M, Hystad P, Reynolds C. Environmental guidelines for urban and rural land  
42 development in British Columbia: supporting information on air quality. 2012.  
43  
44 29 Henderson SB, Beckerman B, Jerrett M, et al. Application of land use regression to  
45 estimate long-term concentrations of traffic-related nitrogen oxides and fine particulate  
46 matter. *Environ Sci Technol* 2007;41:2422-8.  
47  
48 30 Larson T, Henderson SB, Brauer M. Mobile Monitoring of Particle Light Absorption  
49 Coefficient in an Urban Area as a Basis for Land Use Regression. *Environmental Science*  
50 *& Technology* 2009;43:4672-4678.  
51  
52 31 Brauer M, Lencar C, Tamburic L, et al. A cohort study of traffic-related air pollution  
53 impacts on birth outcomes. *Environ Health Perspect* 2008;116:680-6.  
54  
55 32 Wang RR, Henderson SB, Sbihi H, et al. Temporal stability of land use regression models  
56 for traffic-related air pollution. *Atmospheric Environment* 2013;64:312-319.  
57  
58 33 Aminbakhsh A, Frohlich J, Mancini GB. Detection of early atherosclerosis with B mode  
59 carotid ultrasonography: assessment of a new quantitative approach. *Clin Invest Med*  
60 1999;22:265-74.  
34  
35 Chan SY, Mancini GB, Kuramoto L, et al. The prognostic importance of endothelial  
36 dysfunction and carotid atheroma burden in patients with coronary artery disease. *J Am*  
37 *Coll Cardiol* 2003;42:1037-43.

- 1  
2  
3 35 Gan WQ, McLean K, Brauer M, et al. Modeling population exposure to community noise  
4 and air pollution in a large metropolitan area. *Environ Res* 2012;116:11-6.  
5  
6 36 Lenters V, Uiterwaal CS, Beelen R et al. Long-term exposure to air pollution and vascular  
7 damage in young adults. *Epidemiology* 2010;21:512-20.  
8  
9 37 Johnson HM, Piper ME, Baker TB, et al. Effects of smoking and cessation on subclinical  
10 arterial disease: a substudy of a randomized controlled trial. *PLoS One* 2012;7:e35332.  
11  
12 38 Wilker EH, Mittleman MA, Coull BA et al. Long-term Exposure to Black Carbon and  
13 Carotid Intima-Media Thickness: The Normative Aging Study. *Environ Health Perspect*  
14 2013;121:1061-7.  
15  
16 39 Painschab MS, Davila-Roman VG, Gilman RH et al. Chronic exposure to biomass fuel is  
17 associated with increased carotid artery intima-media thickness and a higher prevalence of  
18 atherosclerotic plaque. *Heart* 2013;99:984-91.  
19  
20 40 Rivera M, Basagana X, Aguilera I et al. Association between long-term exposure to  
21 traffic-related air pollution and subclinical atherosclerosis: the REGICOR study. *Environ*  
22 *Health Perspect* 2013;121:223-30.  
23  
24 41 Sun M, Kaufman JD, Kim SY et al. Particulate matter components and subclinical  
25 atherosclerosis: common approaches to estimating exposure in a Multi-Ethnic Study of  
26 Atherosclerosis cross-sectional study. *Environ Health* 2013;12:39.  
27  
28 42 Bonner MR, Han D, Nie J, et al. Positional accuracy of geocoded addresses in  
29 epidemiologic research. *Epidemiology* 2003;14:408-12.  
30  
31 43 Xie SD, Zhang YH, Li Q, et al. Spatial distribution of traffic-related pollutant  
32 concentrations in street canyons. *Atmospheric Environment* 2003;37:3213-3224.  
33  
34 44 Restrepo C, Zimmerman R, Thurston G et al. A comparison of ground-level air quality  
35 data with New York State Department of Environmental Conservation monitoring  
36 stations data in South Bronx, New York. *Atmospheric Environment* 2004;38:5295-5304.  
37  
38 45 Hystad PU, Setton EM, Allen RW, et al. Modeling residential fine particulate matter  
39 infiltration for exposure assessment. *J Expo Sci Environ Epidemiol* 2009;19:570-9.  
40  
41 46 Janssen NA, Hoek G, Brunekreef B, et al. Personal sampling of particles in adults:  
42 relation among personal, indoor, and outdoor air concentrations. *Am J Epidemiol*  
43 1998;147:537-47.  
44  
45 47 Nethery E, Leckie SE, Teschke K, et al. From measures to models: an evaluation of air  
46 pollution exposure assessment for epidemiological studies of pregnant women. *Occup*  
47 *Environ Med* 2008;65:579-86.  
48  
49 48 Shanmugam N, Roman-Rego A, Ong P, et al. Atherosclerotic plaque regression: fact or  
50 fiction? *Cardiovasc Drugs Ther* 2010;24:311-7.  
51  
52  
53  
54  
55  
56  
57  
58  
59  
60

# Long-Term Exposure to Traffic-Related Air Pollution and Progression of Carotid Artery Atherosclerosis: A Prospective Cohort Study

Wen Qi Gan,<sup>1,2</sup> Ryan W. Allen,<sup>3</sup> Michael Brauer,<sup>4</sup>  
Hugh W. Davies,<sup>4</sup> G.B. John Mancini,<sup>5,6</sup> Scott A. Lear<sup>3,7,8</sup>

<sup>1</sup>Department of Population Health, Hofstra North Shore-LIJ School of Medicine, Great Neck, New York

<sup>2</sup>Feinstein Institute for Medical Research, North Shore-Long Island Jewish Health System, Great Neck, New York

<sup>3</sup>Faculty of Health Sciences, Simon Fraser University, Burnaby, British Columbia, Canada

<sup>4</sup>School of Population and Public Health, University of British Columbia, Vancouver, British Columbia, Canada

<sup>5</sup>Healthy Heart Program, St. Paul Hospital, Providence Healthcare, Vancouver, British Columbia, Canada

<sup>6</sup>Faculty of Medicine, Division of Cardiology, University of British Columbia, Vancouver, British Columbia, Canada

<sup>7</sup>Department of Biomedical Physiology and Kinesiology, Simon Fraser University, Burnaby, British Columbia, Canada

<sup>8</sup>Division of Cardiology, Providence Health Care, Vancouver, Canada

## Correspondence to:

Wen Qi Gan, MD PhD  
175 Community Drive, Room 235  
Great Neck, NY 11021  
Phone: 516-465-3053  
Fax: 516-465-2699  
E-mail: [wgan@nshs.edu](mailto:wgan@nshs.edu)

**Key Words:** air pollution, atherosclerosis, cohort studies, vehicle emissions

**Word Count (text): 4,519**

**ABSTRACT**

**Objectives:** Epidemiologic studies have demonstrated associations between long-term exposure to traffic-related air pollution and coronary heart disease (CHD). Atherosclerosis is the principal pathological process responsible for CHD events, but effects of traffic-related air pollution on progression of atherosclerosis are not clear. This study aimed to investigate associations between long-term exposure to traffic-related air pollution and progression of carotid artery atherosclerosis.

**Setting:** Healthy volunteers in metropolitan Vancouver, Canada.

**Participants and outcome measures:** 509 participants aged 30-65 years were recruited and followed for approximately 5 years. At baseline and end of follow-up, participants underwent carotid artery ultrasound examinations to assess atherosclerosis severity, including carotid intima-media thickness, plaque area, plaque number, and total area. Annual change of each atherosclerosis marker during the follow-up period was calculated as the difference between these two measurements divided by years of follow-up. Living close to major roads was defined as  $\leq 150$  meters from a highway or  $\leq 50$  meters from a major road. Residential exposures to traffic-related air pollutants including black carbon, fine particles, nitrogen dioxide, and nitric oxide were estimated using high-resolution land use regression models. The data were analyzed using general linear models adjusting for various covariates.

**Results:** At baseline, there were no significant differences in any atherosclerosis markers between participants living close to and those living away from major roads. After follow-up, the differences in annual changes of these markers between these two groups were small and not statistically significant. Also, no significant associations were observed with concentrations of

1  
2  
3 traffic-related air pollutants including black carbon, fine particles, nitrogen dioxide, and nitric  
4  
5  
6 oxide.

7  
8 **Conclusions:** This study did not find significant associations between traffic-related air pollution  
9  
10 and progression of carotid artery atherosclerosis in a region with lower levels and smaller  
11  
12 contrasts of ambient air pollution.  
13

## 14 15 16 17 18 19 20 **ARTICLE SUMMARY**

### 21 22 **Strengths and limitations of this study**

- 23  
24 • This study utilized multiple markers, including carotid intima-media thickness, plaque  
25  
26 area, plaque number, and total area, to assess carotid artery atherosclerosis. Exposure to  
27  
28 traffic-related air pollution was assessed using residential proximity to major roads and  
29  
30 spatially resolved estimates of residential exposure to black carbon, fine particles,  
31  
32 nitrogen dioxide, and nitric oxide.  
33
- 34  
35 • This study simultaneously investigated cross-sectional and longitudinal associations  
36  
37 between exposure to traffic-related air pollution and carotid artery atherosclerosis in a  
38  
39 large metropolitan area with relatively low levels of air pollution.  
40  
41
- 42  
43 • Compared with previous longitudinal studies, this study has a relatively long follow-up  
44  
45 period (median 5.4 years, range 3.7–7.2 years).  
46  
47
- 48  
49 • Small sample size, moderate progression of atherosclerosis in the study sample, along  
50  
51 with **lower levels and smaller contrasts** of ambient air pollution in the study region, might  
52  
53 limit our ability to detect presumably small effects of air pollution on progression of  
54  
55 carotid artery atherosclerosis in this study.  
56

## INTRODUCTION

Convincing epidemiologic evidence has demonstrated that long-term exposure to ambient air pollution is associated with cardiovascular disease, especially coronary heart disease (CHD), morbidity and mortality.<sup>1</sup> Although the biologic mechanisms underlying the associations are not fully understood, it is well known that atherosclerosis is the principal pathological process responsible for chronic and acute CHD events.<sup>2-4</sup> Atherosclerosis is a chronic condition characterized by a progressive buildup of plaques in the large arteries, which may cause chronic ischemia due to insufficient blood supply and acute cardiac events due to plaques rupture and blood clot.<sup>2,3</sup> Epidemiologic studies have shown that severity of atherosclerosis measured by carotid intima-media thickness (CIMT) is able to predict future cardiovascular risk (e.g., CHD and stroke) for people without cardiovascular diseases.<sup>5-7</sup>

It has been hypothesized that particulate air pollution is associated with cardiovascular outcomes through two major pathways: promoting atherosclerosis progression and triggering acute cardiac events in individuals with severe atherosclerosis, especially vulnerable plaques.<sup>3,8</sup> Short-term exposure studies have provided sufficient evidence to support acute triggering effects of particulate air pollution.<sup>1</sup> Long-term exposure studies based on clinical outcomes presumably integrate both atherosclerosis progression and acute triggering effects, and thus have greater effect sizes than short-term exposure studies. However, these studies are unable to distinguish these two different adverse effects of particulate air pollution.<sup>1,8</sup> Evidence is needed to determine the role of particulate air pollution on progression of atherosclerosis.<sup>8</sup>

Experimental studies in animals with risk factors for atherosclerosis have provided some evidence that exposure to particulate air pollution is associated with accelerated progression of atherosclerosis.<sup>9,10</sup> However, there is limited epidemiologic evidence in humans to corroborate

1  
2  
3 these findings. Several cross-sectional studies have examined associations of atherosclerosis  
4 severity with residential proximity to road traffic and exposure to fine particulate air pollution,  
5 but their findings were not fully consistent.<sup>11-15</sup> Two recent longitudinal studies conducted in the  
6 United States have provided limited evidence to support an association between particulate air  
7 pollution and progression of atherosclerosis.<sup>16 17</sup> As suggested by Kunzli and colleagues,<sup>8</sup> it is  
8 necessary to further investigate the relationship between long-term air pollution exposure and  
9 progression of atherosclerosis.  
10  
11  
12  
13  
14  
15  
16  
17  
18

19  
20 Air pollution is a complex mixture of particles, gases, and liquids, mainly derived from  
21 the combustion of fossil fuels.<sup>18</sup> In metropolitan areas, road traffic is a major source of ambient  
22 air pollution, and produces strong spatial gradients in pollution concentrations.<sup>19</sup> It has been  
23 demonstrated that the concentrations of traffic-related air pollutants decrease exponentially from  
24 major roadways and approach background concentrations within about 150 meters.<sup>20 21</sup> Therefore,  
25 the distance from each person's residence to a major roadway may be used as a convenient  
26 surrogate for exposure to traffic-related air pollution.<sup>22</sup> We have previously demonstrated in a  
27 large population-based cohort study conducted in metropolitan Vancouver, Canada, that  
28 residential proximity to road traffic and traffic-related fine particulate air pollution (black carbon)  
29 were associated with increased risk of CHD hospitalization and mortality.<sup>23-25</sup>  
30  
31  
32  
33  
34  
35  
36  
37  
38  
39  
40  
41  
42

43  
44 Based on the previous studies, we used a longitudinal study design to investigate the  
45 associations between progression of carotid artery atherosclerosis and long-term exposure to  
46 traffic-related air pollution, indicated by residential proximity to major roads and residential  
47 concentrations of four major traffic-related air pollutants including black carbon, particulate  
48 matter < 2.5 µm in aerodynamic diameter (PM<sub>2.5</sub>), nitrogen dioxide (NO<sub>2</sub>), and nitric oxide (NO),  
49 in metropolitan Vancouver.  
50  
51  
52  
53  
54  
55  
56



## MATERIALS AND METHODS

### Participants and Study Design

The current study was based on the Multicultural Community Health Assessment Trial (M-CHAT), which was designed to compare body fat distribution in different ethnic groups. The M-CHAT study design has been described in detail elsewhere.<sup>26 27</sup> During 2004-2005, 829 apparently healthy volunteers aged 30-65 years and matched for body mass index (BMI) and ethnicity (Aboriginal, Chinese, European, and South Asian) were recruited in metropolitan Vancouver. During recruitment, individuals with the following characteristics were excluded: (1) having a prior diagnosis of cardiovascular disease or significant comorbidity such as diabetes or hypertension; (2) taking medications that affect cardiovascular risk factors such as lipid-lowering, antihypertensive, or hypoglycemic medications; (3) experiencing recent weight change more than 2.2 kg within recent three months; and (4) having significant prosthetics or amputations.

The participants were followed for approximately five years. Each participant underwent carotid artery ultrasound examinations to assess severity of atherosclerosis at baseline (2004-2005) and the end of follow-up (2009-2011). Residential proximity to major roads and exposures to traffic-related air pollutants were estimated based on participants' residential addresses at baseline. Various potential confounding factors were collected through standard questionnaires that were administered by trained interviewers. General linear models were used to examine cross-sectional and longitudinal associations of carotid artery atherosclerosis with residential traffic proximity and four major traffic-related air pollutants after adjustment for various potential confounding factors including residential exposure to community noise.

## Exposure Assessment

### *Residential Proximity to Major Roads*

Residential proximity to major roads was estimated based on participants' geocoded baseline residential addresses using a geographic information system (GIS). In DMTI ArcView street file dataset for British Columbia (Canmap Streetfiles, version 2006.3; DMTI Spatial, Markham, Ontario, Canada), road types in the study region were divided into two categories: highway (DMTI type 1 and 2 roads) including expressway (average traffic counts 114,000 vehicles/day) and principal highway (21,000 vehicles/day), or major road (DMTI type 3 and 4 roads) including secondary highway (18,000 vehicles/day) and major road (15,000 vehicles/day). Based on the differences in traffic volumes between highways and major roads,<sup>28</sup> and the previous findings that the concentrations of traffic-related air pollutants decrease exponentially from major roads and approach background concentrations within about 150 meters,<sup>20 21</sup> participants in the current study were divided into two groups: those living close to major roads, defined as  $\leq 150$  meters from a highway or  $\leq 50$  meters from a major road; and those living away from major roads.

### *Air Pollution Exposure Assessment*

The air pollution exposure assessment has been described in detail elsewhere.<sup>29-31</sup> High-resolution (10 meters) land-use regression (LUR) models were developed in the study region to estimate annual average concentrations for four major traffic-related air pollutants, including black carbon, PM<sub>2.5</sub>, NO<sub>2</sub>, and NO. The performance of the models was evaluated using the coefficient of determination ( $R^2$ ) and estimated mean error ( $\pm$  SD) from leave-one-out cross validation analysis (black carbon:  $R^2 = 0.56$ , mean error =  $0 \pm 0.23 \times 10^{-5}$ /m; PM<sub>2.5</sub>:  $R^2 = 0.52$ ,

1  
2  
3 mean error =  $0 \pm 1.50 \mu\text{g}/\text{m}^3$ ;  $\text{NO}_2$ :  $R^2 = 0.56$ , mean error =  $0 \pm 5.2 \mu\text{g}/\text{m}^3$ ;  $\text{NO}$ :  $R^2 = 0.62$ , mean  
4  
5 error =  $2.02 \pm 15.5 \mu\text{g}/\text{m}^3$ ). The predictors and performance of these LUR models have been  
6  
7 discussed in detail previously.<sup>24</sup> The LUR models were developed in 2003, and we have recently  
8  
9 shown that the spatial patterns of traffic-related air pollution in Vancouver remained stable  
10  
11 between 2003 and 2010.<sup>32</sup> The air pollution data were assigned to participants through their  
12  
13 baseline residential addresses to approximate individual exposure to these traffic-related air  
14  
15 pollutants.  
16  
17  
18  
19  
20  
21

## 22 Carotid Artery Atherosclerosis Assessment

23  
24 The assessment method for carotid artery atherosclerosis has been described in detail  
25  
26 elsewhere.<sup>27 33</sup> High-resolution B-mode ultrasonography equipped with a 10-MHz linear array  
27  
28 transducer was used. A uniform length of 10 mm in the far wall of the common carotid artery  
29  
30 within 2 cm proximal to the carotid bulb was selected for manual measurement of intima-media  
31  
32 thickness (IMT). In the selected area, the largest IMT without focal lesions was measured; the  
33  
34 average of the largest IMT in the left and right carotid arteries was calculated as a person's  
35  
36 carotid IMT (CIMT). A plaque was defined as any focal protrusion above the surrounding intima;  
37  
38 plaque number was counted in each carotid segment including common, internal, external carotid  
39  
40 arteries, and carotid bulb for two carotid arteries. The area of a single plaque was calculated as  
41  
42 the average lesion thickness (mm) multiplied by the lesion length (mm); and plaque area was  
43  
44 calculated as the sum of the area for each plaque ( $\text{mm}^2$ ). Total area ( $\text{mm}^2$ ) was calculated as the  
45  
46 sum of plaque area and IMT area measured in the left and right carotid arteries; IMT area ( $\text{mm}^2$ )  
47  
48 was calculated as the average IMT (mm) multiplied by the length (20 mm) over which the IMT  
49  
50 was measured. These four atherosclerosis markers were included as outcome variables in the  
51  
52  
53  
54  
55  
56  
57  
58  
59  
60

1  
2  
3 current study, because they are related to cardiovascular risk factors and are able to predict future  
4 cardiovascular events.<sup>5-7 33 34</sup>  
5  
6

7  
8 To evaluate the reproducibility of the measurement, 192 randomly selected participants  
9 from the cohort had the measurements repeated by different technicians. The average difference  
10 between two measurements was 0.3  $\mu\text{m}$  for CIMT, 0.39  $\text{mm}^2$  for plaque area, and 0.13  $\text{mm}^2$  for  
11 total area. The differences were small and not statistically significant.  
12  
13  
14  
15  
16

### 17 18 19 20 **Potential Confounding Factors**

21  
22 The following were important cardiovascular risk factors and were regarded as potential  
23 confounding factors in our analyses: age, sex (male, or female), ethnicity (Aboriginal, Chinese,  
24 European, or South Asian), BMI, cigarette smoking status (never, former, or current smoker),  
25 educational attainment ( $\leq$  high school, or  $>$ high school), annual household income ( $<$  \$30,000;  
26 \$30,000 to \$60,000; or  $\geq$  \$60,000), leisure time physical activity (hours per week), systolic blood  
27 pressure (SBP), diastolic blood pressure (DBP), low-density lipoprotein cholesterol (LDL-C),  
28 high-density lipoprotein cholesterol (HDL-C), and total cholesterol. In the analysis for traffic-  
29 related air pollutants, community noise was also treated as a potential confounding factor.<sup>25</sup>  
30  
31  
32  
33  
34  
35  
36  
37  
38  
39

40  
41 The demographic and behavioral risk factors were collected through standard  
42 questionnaires, which were administered by trained interviewers. Leisure time physical activity  
43 was estimated based on average minutes each week spent in physical activity during the previous  
44 year. Blood pressure was measured using an automated oscillometric office blood pressure  
45 monitor (VSM MedTech Ltd, Coquitlam, Canada). After 10 minutes of seated rest, five  
46 successive measurements were recorded; average SBP and DBP were calculated by averaging  
47 these five readings. Meanwhile, fasting blood samples were collected to measure LDL-C, HDL-C,  
48  
49  
50  
51  
52  
53  
54  
55  
56

1  
2  
3 and total cholesterol using standard enzymatic procedures in the same clinical laboratory.<sup>27</sup>

4  
5 Residential exposure to community noise (annual day-evening-night A-weighted equivalent  
6  
7 continuous noise levels,  $L_{den}$  dB(A)) was estimated based on baseline residential addresses and  
8  
9 surrounding transportation information including road width, speed limits, traffic volume, and  
10  
11 fleet composition.<sup>35</sup>

12  
13  
14  
15 Neighborhood socioeconomic status was assessed using neighborhood income quintiles  
16  
17 and neighborhood education quintiles derived from the 2006 Statistics Canada Census data.  
18  
19 Neighborhood income quintiles were calculated using the medians of household income in the  
20  
21 dissemination areas of the study region. Neighborhood education quintiles were calculated using  
22  
23 the percentages of people with certificate, diploma, or degree in the dissemination areas of the  
24  
25 study region.<sup>23</sup>

## 26 27 28 29 30 31 **Statistical Analyses**

32  
33  
34 Baseline characteristics of participants were compared between the group living close to  
35  
36 and the group living away from major roads using a Chi-squared test for categorical variables,  
37  
38 two-sample t-test for normally distributed continuous variables, and Wilcoxon two-sample test  
39  
40 for skewed continuous variables. Correlations between pollutants were examined using  
41  
42 Spearman's rank correlation analysis.

43  
44  
45  
46 General linear models were used to compare carotid atherosclerosis levels between these  
47  
48 two groups. Annual change for each atherosclerosis marker during the follow-up period was  
49  
50 calculated as the difference between these two measurements (end of follow-up minus baseline)  
51  
52 divided by the number of years of follow-up. Adjusted differences of atherosclerosis levels  
53  
54 between these two groups were calculated using the group living away from major roads as the  
55  
56

1  
2  
3 reference category. In addition, we performed two sensitivity analyses for progression of  
4  
5 atherosclerosis. First, we repeated the above analyses for participants with increased severity of  
6  
7 atherosclerosis indicated by each atherosclerosis marker (annual change > 0). Second, we used  
8  
9 the 85th percentile of annual change of each atherosclerosis marker as the cutoff point to identify  
10  
11 participants with greater progression of atherosclerosis (events). The Cox proportional hazard  
12  
13 models were used to calculate relative risks of having greater progression of atherosclerosis for  
14  
15 participants living close to major roads compared with those living away from major roads. In the  
16  
17 Cox models, person-years were calculated for each participant from the date of baseline  
18  
19 examination to the date of follow-up examination.  
20  
21  
22  
23

24  
25 To examine independent associations between residential traffic proximity and carotid  
26  
27 artery atherosclerosis, statistical analyses were performed to control for various potential  
28  
29 confounding variables through four models: model 1 was a crude unadjusted model; model 2 was  
30  
31 adjusted for age (continuous), sex, and ethnicity; model 3 was further adjusted for BMI  
32  
33 (continuous), smoking status, leisure time physical activity (continuous), educational attainment,  
34  
35 and annual household income in addition to the covariates included in model 2; model 4 was  
36  
37 further adjusted for SBP (continuous), LDL-C (continuous), HDL-C (continuous), neighborhood  
38  
39 income quintiles, and neighborhood education quintiles in addition to the covariates included in  
40  
41 model 3. In the analyses for the associations between traffic-related air pollutants and progression  
42  
43 of carotid artery atherosclerosis, we calculated differences of annual changes for each  
44  
45 atherosclerosis marker in relation to an interquartile range elevation in each traffic-related air  
46  
47 pollutant after adjustment for community noise and those covariates included in model 4.  
48  
49  
50  
51

52  
53 All statistical tests were 2-sided and were performed using SAS, version 9.3 (SAS  
54  
55 Institute Inc., Cary, NC, USA).  
56

## RESULTS

A total of 829 participants were recruited at baseline. 13 individuals did not perform the carotid ultrasound examination, and 56 individuals did not provide accurate residential addresses and thus could not be geocoded; these individuals were excluded, leaving 760 participants (92% of those recruited) with complete data at baseline. Among these participants, 509 completed the follow-up, with a follow-up rate of 67%, median follow-up time of 5.4 years (range 3.7–7.2 years). Compared with those lost to follow-up, participants who completed follow-up had higher socioeconomic status (e.g., better education, higher annual household income) and better health profiles (e.g., more never smokers, lower BMI and waist circumference); however, there were no significant differences between the two groups in the baseline carotid artery atherosclerosis (see table 1 and table 2 in the Online Appendix).

Baseline annual average concentrations of traffic-related air pollutants and annual average levels of community noise are summarized in table 1. Overall, air pollution and community noise levels were not strongly correlated; also, air pollutants were not strongly correlated with each other, with the exception of NO and NO<sub>2</sub> (table 1). These results are consistent with those of our previous studies performed in the study region.

At baseline, 117 (23%) participants lived close to major roads. As expected, compared with those living away from major roads, participants living close to major roads were exposed to higher levels of traffic-related air pollutants and community noise (table 1); furthermore, these participants had lower annual household income, were more likely to be Aboriginal and less likely to be of South Asian origin. There were no substantial differences between these two groups with respect to age, sex, education, BMI, smoking status, alcohol intake, physical activity, blood pressure, and blood lipids (table 2).

1  
2  
3 At baseline, compared with those living away from major roads, participants living close  
4 to major roads had similar levels of carotid atherosclerosis measured by CIMT, plaque area,  
5 plaque number, and total area. After adjustment for various potential confounding factors in  
6 models 2-4, there were no significant differences between these two groups in these  
7 atherosclerosis markers (table 3).  
8  
9

10  
11  
12  
13  
14  
15 After five years of follow-up, atherosclerosis levels were increased for most participants  
16 (see etable 3 in the Online Appendix). Overall, the mean values of annual changes for these  
17 atherosclerosis markers were similar between these two groups; the differences in annual changes  
18 of these markers between these two groups were small and not statistically significant after  
19 adjustment for various potential confounding factors in models 2-4 (table 4). When the analyses  
20 were repeated for participants with increased atherosclerosis indicated by each single marker, the  
21 results were similar to those presented in table 4 (see etable 4 in the Online Appendix); when the  
22 85th percentile of annual change of each marker was used to identify participants with greater  
23 progression, the risk of having greater progression was not significantly different between these  
24 two groups (see etable 5 in the Online Appendix). Similarly, there were no significant  
25 associations between annual changes in these atherosclerosis markers and traffic-related air  
26 pollutants, including black carbon, PM<sub>2.5</sub>, NO<sub>2</sub>, and NO, after adjustment for various potential  
27 confounding factors including residential exposure to community noise (table 5). There were no  
28 substantial differences between the results from the final models with and without community  
29 noise.  
30  
31  
32  
33  
34  
35  
36  
37  
38  
39  
40  
41  
42  
43  
44  
45  
46  
47  
48  
49

50 The stratified analyses show that atherosclerosis effects associated with exposure to road  
51 traffic were stronger for participants with the following characteristics: male, Chinese and South  
52 Asian background, higher family income, obesity, and never smokers (table 6). The results for  
53  
54  
55  
56



1  
2  
3 some strata (e.g., age  $\geq$  60 years) were not completely consistent across different atherosclerosis  
4  
5 markers.  
6  
7  
8  
9

## 10 **DISCUSSION**

11  
12 In this longitudinal study with over five years of follow-up, we did not find significant  
13  
14 associations between residential exposure to traffic-related air pollution and carotid artery  
15  
16 atherosclerosis in either cross-sectional or longitudinal analyses. Our results were largely  
17  
18 consistent for various markers of carotid artery atherosclerosis including CIMT, plaque area,  
19  
20 plaque number, and total area and for various traffic exposure indicators including residential  
21  
22 traffic proximity, black carbon, PM<sub>2.5</sub>, NO<sub>2</sub>, and NO. This study has several strengths including  
23  
24 its longitudinal study design, the relatively long follow-up period, multiple markers of carotid  
25  
26 artery atherosclerosis, various traffic exposure indicators, and control for various potential  
27  
28 confounding factors in the statistical analyses.  
29  
30  
31  
32  
33

34 As measurement error in the ultrasound examination of carotid atherosclerosis might have  
35  
36 prevented detection of very subtle effects of air pollution on carotid atherosclerosis, we  
37  
38 performed two sensitivity analyses by restricting analyses to participants with increased  
39  
40 atherosclerosis and by using the 85th percentile of annual change of each marker to identify  
41  
42 participants with greater progression of atherosclerosis. The results of these sensitivity analyses  
43  
44 are similar to those observed in the main analyses, suggesting that the null associations were less  
45  
46 likely due to measurement error in atherosclerosis assessment. For those covariates included in  
47  
48 the final models, age, sex, race, and LDL-C levels were each significantly associated with  
49  
50 progression of carotid artery atherosclerosis indicated by plaque area, plaque number, and total  
51  
52 area. There were no significant associations of carotid artery atherosclerosis with BMI, smoking,  
53  
54  
55  
56  
57  
58  
59  
60

1  
2  
3 physical activity, or blood pressure. Notably, we did not find any significant associations of  
4  
5 CIMT with established cardiovascular risk factors. As mentioned before, our study participants  
6  
7  
8 were young (30-65 years) and healthy (e.g., they did not have comorbid conditions); these factors  
9  
10 might partly explain the null associations.

11  
12 Compared with the two recent longitudinal studies (see etable 6 in the Online Appendix)  
13  
14 by Adar *et al*<sup>16</sup> and Kunzli *et al*,<sup>17</sup> our study is different in the following four aspects: (1) on  
15  
16 average, our participants were more than 10 years younger (baseline mean age 47 years versus 62  
17  
18 and 59 years); (2) the study region had lower levels and smaller contrasts of ambient PM<sub>2.5</sub>  
19  
20 (baseline annual mean concentration 4.1 µg/m<sup>3</sup> versus 16.6 and 27.8 µg/m<sup>3</sup>; interquartile range  
21  
22 1.4 µg/m<sup>3</sup> versus 2.5 and 1.7 µg/m<sup>3</sup>). (3) our participants did not have comorbid conditions such  
23  
24 as diabetes and hypertension at baseline; and (4) the current study took into account the potential  
25  
26 influences of community noise on the associations between traffic-related air pollutants and  
27  
28 progression of carotid artery atherosclerosis. These differences may partly explain the null  
29  
30 associations in our study. Overall, our baseline CIMT (673 ± 122 µm) and annual change in  
31  
32 CIMT (9.2 ± 12.1 µm/yr) were comparable with those by Adar *et al* (678 ± 189 µm, 14.0 ± 53.0  
33  
34 µm/yr),<sup>16</sup> but were quite different from those of Kunzli *et al* (780 ± 150 µm, 2.0 ± 12.9 µm/yr);<sup>17</sup>  
35  
36 perhaps because the former is based upon a multi-ethnic sample, similar to our study; whereas the  
37  
38 latter was based on the data from five clinical trials in which the interventions might have played  
39  
40 a role in reducing progression of carotid artery atherosclerosis.

41  
42 It should be noted that the findings of the two recent longitudinal studies were not entirely  
43  
44 consistent.<sup>16 17</sup> Adar *et al* found that a 2.5 µg/m<sup>3</sup> increase in PM<sub>2.5</sub> was associated with a 5.0 µm  
45  
46 (95% CI, 2.6 to 7.4 µm) annual increase in CIMT; however, the association was observed for  
47  
48 within- but not between-city contrasts.<sup>16</sup> Kunzli *et al* reported that a 10 µg/m<sup>3</sup> elevation in PM<sub>2.5</sub>  
49  
50  
51  
52  
53  
54  
55  
56

1  
2  
3 was associated with a non-significant 2.5  $\mu\text{m}$  (95% CI, -0.3 to 5.4  $\mu\text{m}$ ) annual increase in CIMT;  
4  
5 however, living close to a major roadway was associated with a 5.5  $\mu\text{m}$  (95% CI, 0.13-10.79  $\mu\text{m}$ )  
6  
7 annual increase in CIMT compared with those living away from a major roadway.<sup>17</sup> In addition,  
8  
9 the findings of previous cross-sectional studies were also not consistent. Kunzli *et al* reported a  
10  
11 positive but non-significant association between  $\text{PM}_{2.5}$  and CIMT using the baseline data from  
12  
13 two clinical trials in Los Angeles.<sup>11</sup> Based on the MESA Air baseline data, Diez Roux *et al* found  
14  
15 that  $\text{PM}_{2.5}$  was associated with CIMT, but no significant association was observed with coronary  
16  
17 artery calcification;<sup>12</sup> Allen *et al* found that aortic calcification was associated with  $\text{PM}_{2.5}$  among  
18  
19 participants with long-term residence, but no significant association was observed with residential  
20  
21 traffic proximity.<sup>13</sup> Based on the baseline data from a Germany study conducted in Ruhr area,  
22  
23 Hoffmann *et al* found that traffic proximity, but not  $\text{PM}_{2.5}$ , was associated with coronary artery  
24  
25 calcification;<sup>14</sup> whereas Bauer *et al* found that  $\text{PM}_{2.5}$ , but not traffic proximity, was associated  
26  
27 with CIMT.<sup>15</sup> Using data from the Atherosclerosis Risk in Young Adults study, Lenters *et al* did  
28  
29 not find any associations of CIMT with air pollutants ( $\text{PM}_{2.5}$ , black smoke,  $\text{NO}_2$ ,  $\text{SO}_2$ ) and traffic  
30  
31 indicators (traffic proximity, traffic density).<sup>36</sup> In a randomized, double-blind, placebo-controlled  
32  
33 trial on the association between cigarette smoking and progression of CIMT, Johnson *et al* did  
34  
35 not find a significant association between cigarette smoking and progression of CIMT.<sup>37</sup> Recently,  
36  
37 in a panel study with 380 participants, Wilker *et al* found that a 0.26  $\mu\text{g}/\text{m}^3$  (interquartile range)  
38  
39 increase in black carbon concentrations was associated with a 1.1% increase in CIMT (95% CI,  
40  
41 0.4-1.7%).<sup>38</sup> Also, several recent cross-sectional studies have consistently found significant  
42  
43 associations of CIMT with biomass fuel<sup>39</sup> and traffic-related air pollution.<sup>40 41</sup> In the current study,  
44  
45 we did not find significant associations of CIMT or other atherosclerosis markers with traffic  
46  
47 proximity and traffic-related air pollution. The findings of these studies suggest that  
48  
49  
50  
51  
52  
53  
54  
55  
56  
57  
58  
59  
60

1  
2  
3 inconsistencies are existent within and between different studies on the relationship between  
4 ambient air pollution and severity of atherosclerosis, and that CIMT is not necessarily an ideal  
5  
6  
7  
8  
9  
10  
11  
12  
13  
14  
15  
16  
17  
18  
19  
20  
21  
22  
23  
24  
25  
26  
27  
28  
29  
30  
31  
32  
33  
34  
35  
36  
37  
38  
39  
40  
41  
42  
43  
44  
45  
46  
47  
48  
49  
50  
51  
52  
53  
54  
55  
56  
57  
58  
59  
60

inconsistencies are existent within and between different studies on the relationship between ambient air pollution and severity of atherosclerosis, and that CIMT is not necessarily an ideal marker to reflect adverse cardiovascular effects associated with environmental exposure.

There are some limitations in our study that might have potentially affected the study results. Residential proximity to road traffic is a convenient but crude surrogate for residential exposure to traffic-related air pollution. First, geocoding of residential addresses in a GIS might have introduced positional error.<sup>42</sup> Given the sharp concentration gradients of traffic-related air pollution near major roads, the positional error might have introduced some exposure misclassification. Second, residential traffic proximity did not take into account environmental factors that might have affected actual residential exposure such as wind direction, street canyons,<sup>43</sup> housing characteristics,<sup>44</sup> and indoor infiltration of air pollutants.<sup>45</sup> Third, although residential exposure is able to reasonably reflect personal exposure,<sup>46 47</sup> individual factors such as time spent in home, outdoor activity, and occupational exposure might have affected actual personal exposure. Fourth, our exposure assessment was based on participants' baseline residential addresses, we did not have residential history information during the follow-up period. Exposure misclassification might have occurred for those who changed their residences and therefore their exposure status. Overall, all these factors would be expected to cause nondifferential exposure misclassification, reducing our ability to uncover the true relationship between traffic-related air pollution and carotid artery atherosclerosis.

Loss to follow-up was another limitation of the current study. 33% of participants were lost to follow-up, leaving a relatively small sample of 509 individuals. Overall, participants who completed follow-up had higher socioeconomic status and better health profiles compared with those lost to follow-up. Therefore loss to follow-up, in combination with the relatively small

1  
2  
3 sample size, might potentially contribute to the null associations in our study. Finally, after the  
4  
5 first ultrasound examination of carotid atherosclerosis, it was possible that some participants  
6  
7 might have taken medications (e.g., statins) that were able to reduce progression of  
8  
9 atherosclerosis.<sup>48</sup> We did not have information on medication use during the follow-up period.  
10  
11 Nevertheless, as mentioned before, we did exclude persons who took relevant medications at  
12  
13 baseline. Also, this was a group of healthy people who did not have cardiovascular diseases or  
14  
15 comorbid conditions. Therefore, they were less likely to take medications such as statins during  
16  
17 the follow-up period.  
18  
19  
20

21  
22 Furthermore, this study has a smaller sample size compared with two recently reported  
23  
24 cohort studies.<sup>16 17</sup> However, some previous studies with small sample sizes are still able to detect  
25  
26 significant associations of CIMT with black carbon (N = 380)<sup>38</sup> and residential traffic proximity  
27  
28 (N = 777 in a subgroup).<sup>17</sup> Based on these studies, it was possible for our study (N = 509) to  
29  
30 detect a significant association between traffic-related air pollution and carotid artery  
31  
32 atherosclerosis if the association was really existent in the population.  
33  
34  
35

36 As discussed before, in the study region, the air pollution levels were low (annual mean  
37  
38 PM<sub>2.5</sub> concentration 4.1 µg/m<sup>3</sup>) and the exposure contrast was relatively small (interquartile range  
39  
40 1.4 µg/m<sup>3</sup>), which may have played an important role in the null associations with atherosclerosis  
41  
42 markers. Finally, the measurement of CIMT was based on the average of the largest intima-media  
43  
44 thickness without focal lesions in the specified areas. Because the largest thickness area at  
45  
46 baseline might potentially progress to become a focal lesion during the follow-up period, the  
47  
48 second CIMT measure at the end of follow-up might be smaller than the baseline measure,  
49  
50 leading to artificially decreased CIMT. Nevertheless, this is not a major problem because other  
51  
52 larger thickness area at baseline might potentially progress to become the largest intima-media  
53  
54  
55  
56

1  
2  
3 thickness without focal lesions at the end of follow-up. Also, this type of progression of  
4  
5 atherosclerosis could be reflected by plaque number, plaque area, and total area.  
6  
7

8 The stratified analyses (Table 6) show considerable heterogeneity in effect estimates  
9  
10 across different atherosclerosis markers. Because of very small sample sizes in these subgroups,  
11  
12 it is difficult to determine whether the heterogeneity was due to chance (small sample size) or  
13  
14 reflected real effects. Nevertheless, it was notable that the obese group (versus the non-obese  
15  
16 group), the never-smoking group (versus current/former smoking group), and Chinese or South  
17  
18 Asian background (versus European background) consistently had larger effect estimates across  
19  
20 different atherosclerosis markers.  
21  
22  
23

24 As previously mentioned, in a population-based cohort study conducted in the same study  
25  
26 region and using the same exposure metrics,<sup>23</sup> we found that residential proximity to road traffic  
27  
28 was associated with an increased risk of CHD mortality, whereas changes in traffic proximity  
29  
30 were associated with altered risk of coronary mortality within a relatively short period of time.  
31  
32 Moving closer to major roads was associated with increased risk, whereas moving away from  
33  
34 major roads was associated with decreased risk. These previous findings, in conjunction with the  
35  
36 null associations between traffic proximity and carotid artery atherosclerosis in the current study,  
37  
38 indicate that triggering of acute cardiac events might play an important role in the associations  
39  
40 between traffic-related air pollution and cardiovascular outcomes.  
41  
42  
43  
44  
45  
46  
47

## 48 CONCLUSIONS

49  
50 In this five-year longitudinal study, we did not find significant associations between  
51  
52 residential exposure to traffic-related air pollution and progression of carotid artery  
53  
54 atherosclerosis in a region with relatively low levels and small contrasts of air pollution. Because  
55  
56

1  
2  
3 the findings of previous studies are not fully consistent, more research is needed to determine the  
4  
5 relationship between long-term exposure to traffic-related air pollution and progression of  
6  
7 atherosclerosis.  
8  
9

10  
11  
12 **Contributors:** All authors contributed to the study conception and design. SAL, MB, RWA,  
13  
14 HWD, GBM contributed to the data collection. WQG analyzed the data and was responsible for  
15  
16 the accuracy of the data analysis. WQG wrote the first draft of the manuscript, all authors  
17  
18 critically revised the manuscript for important intellectual content. All authors have read and  
19  
20 approved the final version of the manuscript.  
21  
22

23  
24 **Funding:** This research received no specific grant from any funding agency in the public,  
25  
26 commercial or not-for-profit sectors.  
27  
28

29 **Competing interests:** None.  
30

31 **Ethics approval:** The study protocol was approved by the Simon Fraser University Research  
32  
33 Ethics Board, and all participants provided informed consent.  
34  
35

36 **Provenance and peer review:** Not commissioned; externally peer reviewed.  
37  
38

39 **Data sharing statement:** No additional data are available.  
40  
41  
42  
43  
44  
45  
46  
47  
48  
49  
50  
51  
52  
53  
54  
55  
56  
57  
58  
59  
60

**Table 1.** Baseline average concentrations of traffic-related air pollutants, average levels of community noise, and correlation coefficients<sup>a</sup>

| Pollutant                              | Mean (SD)<br>(close to<br>major roads) <sup>b</sup> | Mean (SD)<br>(away from<br>major roads) <sup>c</sup> | Mean (SD)   | Median | IQR       | Range     | Correlation coefficient |                   |                 |      |       |
|----------------------------------------|-----------------------------------------------------|------------------------------------------------------|-------------|--------|-----------|-----------|-------------------------|-------------------|-----------------|------|-------|
|                                        |                                                     |                                                      |             |        |           |           | BC                      | PM <sub>2.5</sub> | NO <sub>2</sub> | NO   | Noise |
| BC (10 <sup>-5</sup> /m) <sup>d</sup>  | 3.03 (1.60)                                         | 1.24 (0.71)                                          | 1.65 (1.24) | 1.08   | 0.89-1.90 | 0.0-5.00  | 1.00                    | --                | --              | --   | --    |
| PM <sub>2.5</sub> (µg/m <sup>3</sup> ) | 4.27 (1.54)                                         | 4.03 (1.42)                                          | 4.08 (1.45) | 4.09   | 3.40-4.81 | 0.0-10.00 | 0.13                    | 1.00              | --              | --   | --    |
| NO <sub>2</sub> (µg/m <sup>3</sup> )   | 19.1 (4.2)                                          | 16.6 (3.9)                                           | 17.2 (4.1)  | 16.5   | 14.6-18.7 | 7.9-30.0  | 0.38                    | 0.45              | 1.00            | --   | --    |
| NO (µg/m <sup>3</sup> )                | 39.0 (15.7)                                         | 24.1 (6.7)                                           | 27.6 (11.4) | 24.9   | 20.5-31.3 | 8.4-100.0 | 0.51                    | 0.43              | 0.73            | 1.00 | --    |
| Noise (dB(A))                          | 73.9 (6.2)                                          | 65.4 (5.3)                                           | 67.4 (6.6)  | 65.3   | 63.2-71.8 | 37.1-83.4 | 0.40                    | 0.19              | 0.28            | 0.41 | 1.00  |

Abbreviations: BC, black carbon; IQR, interquartile range; NO, nitric oxide; NO<sub>2</sub>, nitrogen dioxide; PM<sub>2.5</sub>, particulate matter < 2.5 µm in aerodynamic diameter; SD, standard deviation.

<sup>a</sup>The results are derived from all participants, unless otherwise specified.

<sup>b</sup>For participants living close to major roads.

<sup>c</sup>For participants living away from major roads.

<sup>d</sup>10<sup>-5</sup>/m black carbon ≈ 0.8 µg/m<sup>3</sup> elemental carbon.



**Table 2.** Baseline characteristics of participants stratified by traffic proximity<sup>a</sup>

| Characteristic                                  | All participants (n = 509) | Close to major roads (n = 117) | Away from major roads (n = 392) | P value <sup>b</sup> |
|-------------------------------------------------|----------------------------|--------------------------------|---------------------------------|----------------------|
| Age (year)                                      | 46.8 ± 9.0                 | 47.2 ± 9.2                     | 46.7 ± 8.9                      | 0.581                |
| Sex, male (%)                                   | 49                         | 51                             | 49                              | 0.593                |
| Race (%)                                        |                            |                                |                                 | 0.008                |
| Aboriginal                                      | 14                         | 22                             | 12                              |                      |
| Chinese                                         | 30                         | 32                             | 29                              |                      |
| European                                        | 29                         | 27                             | 30                              |                      |
| South Asian                                     | 27                         | 19                             | 29                              |                      |
| Education (%)                                   |                            |                                |                                 | 0.589                |
| ≤ High school                                   | 27                         | 29                             | 27                              |                      |
| > High school                                   | 73                         | 71                             | 73                              |                      |
| Annual household income (%)                     |                            |                                |                                 | 0.019                |
| < \$30,000                                      | 24                         | 29                             | 22                              |                      |
| \$30,000 to \$60,000                            | 37                         | 43                             | 35                              |                      |
| ≥ \$60,000                                      | 39                         | 28                             | 43                              |                      |
| Smoke status (%)                                |                            |                                |                                 | 0.357                |
| Current                                         | 7                          | 9                              | 6                               |                      |
| Former                                          | 27                         | 24                             | 28                              |                      |
| Never                                           | 66                         | 67                             | 66                              |                      |
| Alcohol intake (yes, %)                         | 32                         | 30                             | 32                              | 0.649                |
| Physical activity <sup>c</sup> (hours per week) | 3.5<br>(1.7 – 6.5)         | 2.9<br>(1.6 – 6.5)             | 1.3<br>(0.9 – 1.8)              | 0.258                |
| Body mass index (kg/m <sup>2</sup> )            | 27.2 ± 4.7                 | 27.5 ± 4.3                     | 27.1 ± 4.8                      | 0.459                |
| SBP (mmHg)                                      | 118 ± 15                   | 117 ± 14                       | 118 ± 15                        | 0.357                |
| DBP (mmHg)                                      | 77 ± 9                     | 77 ± 10                        | 77 ± 9                          | 0.826                |
| Total cholesterol (mmol/L)                      | 5.2 ± 1.0                  | 5.2 ± 1.1                      | 5.3 ± 1.0                       | 0.667                |
| LDL-C (mmol/L)                                  | 3.2 ± 0.9                  | 3.2 ± 0.9                      | 3.3 ± 0.9                       | 0.311                |
| HDL-C (mmol/L)                                  | 1.3 ± 0.4                  | 1.3 ± 0.4                      | 1.3 ± 0.4                       | 0.637                |

Abbreviations: DBP, diastolic blood pressure; HDL-C, high-density lipoprotein cholesterol; LDL-C, low-density lipoprotein cholesterol; MET, metabolic equivalent of task; SBP, systolic blood pressure.

<sup>a</sup>Data are presented as percentage for categorical variables or mean ± SD for continuous variables; unless otherwise specified.

<sup>b</sup>For comparisons between the group close to and the group away from major roads.

<sup>c</sup>Median (interquartile range).

**Table 3.** Cross-sectional mean differences (95% CIs) in baseline carotid artery atherosclerosis between the group close to and the group away from major road (the reference category)

| Atherosclerosis                | Close to major roads (n = 117) <sup>a</sup> | Away from major roads (n = 392) <sup>a</sup> | Difference <sup>bc</sup> (model 1) | Difference <sup>bc</sup> (model 2) | Difference <sup>bc</sup> (model 3) | Difference <sup>bc</sup> (model 4) |
|--------------------------------|---------------------------------------------|----------------------------------------------|------------------------------------|------------------------------------|------------------------------------|------------------------------------|
| CIMT (μm)                      | 664 ± 125                                   | 673 ± 118                                    | -9.37<br>(-35.24 to 16.49)         | -12.78<br>(-35.32 to 9.76)         | -13.76<br>(-36.17 to 8.64)         | -8.7<br>(-31.15 to 13.75)          |
| Plaque area (mm <sup>2</sup> ) | 5.37 ± 8.10                                 | 6.62 ± 11.85                                 | -1.25<br>(-3.65 to 1.14)           | -1.62<br>(-3.89 to 0.66)           | -1.45<br>(-3.74 to 0.85)           | -0.88<br>(-3.19 to 1.43)           |
| Plaque number                  | 0.83 ± 0.93                                 | 0.90 ± 1.19                                  | -0.07<br>(-0.31 to 0.18)           | -0.12<br>(-0.36 to 0.12)           | -0.11<br>(-0.35 to 0.13)           | -0.05<br>(-0.29 to 0.19)           |
| Total area (mm <sup>2</sup> )  | 18.6 ± 9.0                                  | 20.1 ± 13.0                                  | -1.45<br>(-4.08 to 1.18)           | -1.88<br>(-4.3 to 0.54)            | -1.73<br>(-4.17 to 0.71)           | -1.07<br>(-3.51 to 1.38)           |

Abbreviation: CIMT, carotid intima-media thickness.

<sup>a</sup>Data are presented as mean ± standard deviation.

<sup>b</sup>Difference of least squares means between the group close to and the group away from major roads (the group away from major roads was the reference category).

<sup>c</sup>Model 1 was a crude unadjusted model; model 2 was adjusted for age, sex, and ethnicity; model 3 was further adjusted for BMI, smoking status, physical activity, education, and annual household income; model 4 was additionally adjusted for systolic blood pressure, LDL-C, HDL-C, neighborhood income levels, and neighborhood education levels.

**Table 4.** Mean differences (95% CIs) in annual changes of carotid artery atherosclerosis between the group close to and the group away from major road (the reference category)

| Atherosclerosis                           | Close to major roads (n = 117) <sup>a</sup> | Away from major roads (n = 392) <sup>a</sup> | Difference <sup>bc</sup> (model 1) | Difference <sup>bc</sup> (model 2) | Difference <sup>bc</sup> (model 3) | Difference <sup>bc</sup> (model 4) |
|-------------------------------------------|---------------------------------------------|----------------------------------------------|------------------------------------|------------------------------------|------------------------------------|------------------------------------|
| CIMT ( $\mu\text{m}/\text{year}$ )        | 8.93 $\pm$ 10.57                            | 9.41 $\pm$ 12.29                             | -0.49<br>(-3.07 to 2.09)           | -1.01<br>(-3.62 to 1.61)           | -1.02<br>(-3.66 to 1.63)           | -0.78<br>(-3.49 to 1.92)           |
| Plaque area ( $\text{mm}^2/\text{year}$ ) | 1.35 $\pm$ 2.72                             | 1.26 $\pm$ 2.25                              | 0.09<br>(-0.42 to 0.6)             | 0.03<br>(-0.46 to 0.52)            | 0.03<br>(-0.46 to 0.53)            | 0.07<br>(-0.42 to 0.57)            |
| Plaque number (per year)                  | 0.14 $\pm$ 0.21                             | 0.13 $\pm$ 0.20                              | 0.02<br>(-0.03 to 0.06)            | 0.01<br>(-0.03 to 0.05)            | 0.01<br>(-0.04 to 0.05)            | 0.01<br>(-0.04 to 0.05)            |
| Total area ( $\text{mm}^2/\text{year}$ )  | 1.52 $\pm$ 2.79                             | 1.43 $\pm$ 2.30                              | 0.09<br>(-0.43 to 0.61)            | 0.03<br>(-0.47 to 0.53)            | 0.03<br>(-0.47 to 0.54)            | 0.08<br>(-0.43 to 0.59)            |

Abbreviation: CIMT, carotid intima-media thickness.

<sup>a</sup>Data are presented as mean  $\pm$  standard deviation.

<sup>b</sup>Difference of least squares means between the group close to and the group away from major roads (the group away from major roads was the reference category).

<sup>c</sup>Model 1 was a crude unadjusted model; model 2 was adjusted for age, sex, and ethnicity; model 3 was further adjusted for BMI, smoking status, physical activity, education, and annual household income; model 4 was additionally adjusted for systolic blood pressure, LDL-C, HDL-C, neighborhood income levels, and neighborhood education levels.

**Table 5.** Changes in annual changes of carotid artery atherosclerosis associated with an IQR elevation in traffic-related air pollutants and community noise<sup>a</sup>

| Atherosclerosis                           | Black carbon<br>( $1.01 \times 10^{-5}/\text{m}$ ) <sup>b</sup> | PM <sub>2.5</sub><br>( $1.41 \mu\text{g}/\text{m}^3$ ) <sup>b</sup> | NO <sub>2</sub><br>( $4.07 \mu\text{g}/\text{m}^3$ ) <sup>b</sup> | NO<br>( $10.83 \mu\text{g}/\text{m}^3$ ) <sup>b</sup> | Noise<br>(8.69 dB(A)) <sup>bc</sup> |
|-------------------------------------------|-----------------------------------------------------------------|---------------------------------------------------------------------|-------------------------------------------------------------------|-------------------------------------------------------|-------------------------------------|
| CIMT ( $\mu\text{m}/\text{year}$ )        | -0.32<br>(-1.41 to 0.78)                                        | 0.20<br>(-0.99 to 1.39)                                             | -0.06<br>(-1.36 to 1.23)                                          | -1.07<br>(-2.47 to 0.32)                              | -0.66<br>(-2.44 to 1.12)            |
| Plaque area ( $\text{mm}^2/\text{year}$ ) | -0.08<br>(-0.28 to 0.12)                                        | 0.18<br>(-0.04 to 0.39)                                             | 0.07<br>(-0.17 to 0.31)                                           | 0.10<br>(-0.16 to 0.35)                               | 0.16<br>(-0.16 to 0.49)             |
| Plaque number (per year)                  | -0.00<br>(-0.02 to 0.02)                                        | 0.02<br>(-0.00 to 0.03)                                             | 0.01<br>(-0.01 to 0.03)                                           | 0.01<br>(-0.01 to 0.03)                               | 0.02<br>(-0.01 to 0.04)             |
| Total area ( $\text{mm}^2/\text{year}$ )  | -0.08<br>(-0.29 to 0.12)                                        | 0.17<br>(-0.05 to 0.40)                                             | 0.08<br>(-0.17 to 0.32)                                           | 0.08<br>(-0.18 to 0.34)                               | 0.17<br>(-0.16 to 0.50)             |

Abbreviations: CIMT, carotid intima-media thickness; IQR, interquartile range; NO, nitric oxide; NO<sub>2</sub>, nitrogen dioxide; PM<sub>2.5</sub>, particulate matter < 2.5  $\mu\text{m}$  in aerodynamic diameter;

<sup>a</sup>Adjusted for age, sex, ethnicity, BMI, smoking status, physical activity, education, annual household income, systolic blood pressure, LDL-C, HDL-C, neighborhood income levels, and neighborhood education levels. In the analysis for each air pollutant, community noise was included as a covariate; in the analysis for community noise, black carbon, PM<sub>2.5</sub>, and NO<sub>2</sub> were included as covariates.

<sup>b</sup>Interquartile range for the pollutant.

<sup>c</sup>Annual day-evening-night A-weighted equivalent continuous noise level.

**Table 6.** Mean differences (95% CIs) in annual changes of carotid artery atherosclerosis between the group close to and the group away from major road (the reference category)<sup>a</sup>

|                                            | CIMT ( $\mu\text{m}$ ) | Plaque area ( $\text{mm}^2$ )             | Plaque number              | Total area ( $\text{mm}^2$ )              |
|--------------------------------------------|------------------------|-------------------------------------------|----------------------------|-------------------------------------------|
| Age                                        |                        |                                           |                            |                                           |
| < 60 yr                                    | -0.76 (-3.59 to 2.08)  | 0.01 (-0.51 to 0.53)                      | 0.00 (-0.05 to 0.05)       | 0.02 (-0.51 to 0.56)                      |
| $\geq$ 60 yr                               | 1.38 (-11.27 to 14.02) | -0.18 (-2.53 to 2.17)                     | 0.02 (-0.18 to 0.23)       | -0.16 (-2.52 to 2.19)                     |
| Sex                                        |                        |                                           |                            |                                           |
| Men                                        | 1.29 (-2.81 to 5.39)   | 0.22 (-0.64 to 1.07)                      | 0.00 (-0.07 to 0.07)       | 0.24 (-0.63 to 1.12)                      |
| Women                                      | -1.97 (-5.69 to 1.75)  | -0.06 (-0.57 to 0.45)                     | 0.01 (-0.04 to 0.07)       | -0.07 (-0.59 to 0.45)                     |
| Race                                       |                        |                                           |                            |                                           |
| Aboriginal                                 | -2.41 (-9.48 to 4.66)  | 0.81 (-0.36 to 1.99) <sup>b</sup>         | 0.04 (-0.12 to 0.20)       | 0.77 (-0.43 to 1.97) <sup>b</sup>         |
| Chinese                                    | 0.89 (-4.67 to 6.45)   | <b>1.12 (0.21 to 2.03)<sup>b</sup></b>    | <b>0.08 (0.00 to 0.16)</b> | <b>1.21 (0.30 to 2.12)<sup>b</sup></b>    |
| European                                   | -2.80 (-7.97 to 2.37)  | <b>-1.86 (-3.06 to -0.65)<sup>b</sup></b> | -0.10 (-0.19 to 0.00)      | <b>-1.92 (-3.16 to -0.68)<sup>b</sup></b> |
| South Asian                                | 1.18 (-5.44 to 7.79)   | 0.29 (-0.53 to 1.12) <sup>b</sup>         | 0.02 (-0.07 to 0.1)        | 0.32 (-0.54 to 1.17) <sup>b</sup>         |
| Annual household income                    |                        |                                           |                            |                                           |
| < \$30,000                                 | -1.67 (-7.78 to 4.44)  | -0.07 (-0.98 to 0.85)                     | 0.04 (-0.04 to 0.12)       | -0.10 (-1.04 to 0.84)                     |
| \$30,000 to \$60,000                       | -2.86 (-6.84 to 1.11)  | -0.20 (-0.84 to 0.44)                     | -0.01 (-0.08 to 0.06)      | -0.19 (-0.84 to 0.45)                     |
| $\geq$ \$60,000                            | 1.99 (-3.39 to 7.37)   | 0.61 (-0.48 to 1.7)                       | 0.00 (-0.08 to 0.09)       | 0.65 (-0.47 to 1.77)                      |
| Education                                  |                        |                                           |                            |                                           |
| $\leq$ High school                         | 2.57 (-3.05 to 8.20)   | <b>-1.01 (-1.91 to -0.11)<sup>b</sup></b> | -0.05 (-0.13 to 0.04)      | <b>-0.92 (-1.82 to -0.02)</b>             |
| > High school                              | -1.60 (-4.81 to 1.61)  | 0.49 (-0.12 to 1.10) <sup>b</sup>         | 0.02 (-0.03 to 0.07)       | 0.46 (-0.17 to 1.09)                      |
| Obesity (BMI $\geq$ 30 kg/m <sup>2</sup> ) |                        |                                           |                            |                                           |
| No                                         | -1.24 (-4.34 to 1.85)  | -0.05 (-0.60 to 0.49)                     | 0.01 (-0.04 to 0.06)       | -0.04 (-0.60 to 0.51)                     |
| Yes                                        | 1.81 (-4.94 to 8.56)   | 0.60 (-0.81 to 2.00)                      | 0.05 (-0.06 to 0.17)       | 0.64 (-0.80 to 2.07)                      |
| Smoke status                               |                        |                                           |                            |                                           |
| Current                                    | -9.58 (-26.66 to 7.50) | -1.20 (-4.94 to 2.54)                     | -0.09 (-0.45 to 0.28)      | -1.41 (-5.29 to 2.47)                     |
| Former                                     | -1.92 (-7.89 to 4.05)  | -0.52 (-1.60 to 0.55)                     | -0.01 (-0.11 to 0.09)      | -0.56 (-1.66 to 0.54)                     |
| Never                                      | 0.30 (-3.14 to 3.73)   | 0.24 (-0.38 to 0.86)                      | 0.00 (-0.06 to 0.05)       | 0.27 (-0.36 to 0.90)                      |

<sup>a</sup>Stratified by each covariate, adjusted for all other covariates in the table, and also age, BMI, physical activity, systolic blood pressure, LDL-C, HDL-C, neighborhood income levels, and neighborhood education levels.

<sup>b</sup> $P < 0.05$  for the interaction term (traffic proximity and the categorical variable) in the final model.

## REFERENCES

- 1 Brook RD, Rajagopalan S, Pope CA, 3rd et al. Particulate matter air pollution and cardiovascular disease: An update to the scientific statement from the American Heart Association. *Circulation* 2010;121:2331-78.
- 2 Lusis AJ. Atherosclerosis. *Nature* 2000;407:233-41.
- 3 Libby P, Theroux P. Pathophysiology of coronary artery disease. *Circulation* 2005;111:3481-8.
- 4 Ross R. The pathogenesis of atherosclerosis: a perspective for the 1990s. *Nature* 1993;362:801-9.
- 5 Chambless LE, Heiss G, Folsom AR et al. Association of coronary heart disease incidence with carotid arterial wall thickness and major risk factors: the Atherosclerosis Risk in Communities (ARIC) Study, 1987-1993. *Am J Epidemiol* 1997;146:483-94.
- 6 Stein JH, Korcarz CE, Hurst RT et al. Use of carotid ultrasound to identify subclinical vascular disease and evaluate cardiovascular disease risk: a consensus statement from the American Society of Echocardiography Carotid Intima-Media Thickness Task Force. Endorsed by the Society for Vascular Medicine. *J Am Soc Echocardiogr* 2008;21:93-111; quiz 189-90.
- 7 Chambless LE, Folsom AR, Clegg LX et al. Carotid wall thickness is predictive of incident clinical stroke: the Atherosclerosis Risk in Communities (ARIC) study. *Am J Epidemiol* 2000;151:478-87.
- 8 Kunzli N, Perez L, von Klot S et al. Investigating air pollution and atherosclerosis in humans: concepts and outlook. *Prog Cardiovasc Dis* 2011;53:334-43.
- 9 Sun Q, Wang A, Jin X et al. Long-term air pollution exposure and acceleration of atherosclerosis and vascular inflammation in an animal model. *JAMA* 2005;294:3003-10.
- 10 Suwa T, Hogg JC, Quinlan KB, Ohgami A, Vincent R, van Eeden SF. Particulate air pollution induces progression of atherosclerosis. *J Am Coll Cardiol* 2002;39:935-42.
- 11 Kunzli N, Jerrett M, Mack WJ et al. Ambient air pollution and atherosclerosis in Los Angeles. *Environ Health Perspect* 2005;113:201-6.
- 12 Diez Roux AV, Auchincloss AH, Franklin TG et al. Long-term exposure to ambient particulate matter and prevalence of subclinical atherosclerosis in the Multi-Ethnic Study of Atherosclerosis. *Am J Epidemiol* 2008;167:667-75.
- 13 Allen RW, Criqui MH, Diez Roux AV et al. Fine particulate matter air pollution, proximity to traffic, and aortic atherosclerosis. *Epidemiology* 2009;20:254-64.
- 14 Hoffmann B, Moebus S, Mohlenkamp S et al. Residential exposure to traffic is associated with coronary atherosclerosis. *Circulation* 2007;116:489-96.
- 15 Bauer M, Moebus S, Mohlenkamp S et al. Urban particulate matter air pollution is associated with subclinical atherosclerosis: results from the HNR (Heinz Nixdorf Recall) study. *J Am Coll Cardiol* 2010;56:1803-8.
- 16 Adar SD, Sheppard L, Vedal S et al. Fine particulate air pollution and the progression of carotid intima-medial thickness: a prospective cohort study from the multi-ethnic study of atherosclerosis and air pollution. *PLoS Med* 2013;10:e1001430.
- 17 Kunzli N, Jerrett M, Garcia-Esteban R et al. Ambient air pollution and the progression of atherosclerosis in adults. *PLoS One* 2010;5:e9096.

- 1  
2  
3 18 Brook RD, Franklin B, Cascio W et al. Air pollution and cardiovascular disease: a  
4 statement for healthcare professionals from the Expert Panel on Population and  
5 Prevention Science of the American Heart Association. *Circulation* 2004;109:2655-71.  
6  
7 19 Health Effects Institute. Traffic-Related Air Pollution. A Critical Review of the Literature  
8 on Emissions, Exposure, and Health Effects 2010.  
9  
10 20 Zhu Y, Hinds WC, Kim S, Sioutas C. Concentration and size distribution of ultrafine  
11 particles near a major highway. *J Air Waste Manag Assoc* 2002;52:1032-42.  
12  
13 21 Zhou Y, Levy JI. Factors influencing the spatial extent of mobile source air pollution  
14 impacts: a meta-analysis. *Bmc Public Health* 2007;7:89.  
15  
16 22 Jerrett M, Arain A, Kanaroglou P et al. A review and evaluation of intraurban air  
17 pollution exposure models. *J Expo Anal Environ Epidemiol* 2005;15:185-204.  
18  
19 23 Gan WQ, Tamburic L, Davies HW, Demers PA, Koehoorn M, Brauer M. Changes in  
20 residential proximity to road traffic and the risk of death from coronary heart disease.  
21 *Epidemiology* 2010;21:642-9.  
22  
23 24 Gan WQ, Koehoorn M, Davies HW, Demers PA, Tamburic L, Brauer M. Long-term  
24 exposure to traffic-related air pollution and the risk of coronary heart disease  
25 hospitalization and mortality. *Environ Health Perspect* 2011;119:501-7.  
26  
27 25 Gan WQ, Davies HW, Koehoorn M, Brauer M. Association of long-term exposure to  
28 community noise and traffic-related air pollution with coronary heart disease mortality.  
29 *Am J Epidemiol* 2012;175:898-906.  
30  
31 26 Lear SA, Birmingham CL, Chockalingam A, Humphries KH. Study design of the  
32 Multicultural Community Health Assessment Trial (M-CHAT): a comparison of body fat  
33 distribution in four distinct populations. *Ethn Dis* 2006;16:96-100.  
34  
35 27 Lear SA, Humphries KH, Kohli S, Frohlich JJ, Birmingham CL, Mancini GB. Visceral  
36 adipose tissue, a potential risk factor for carotid atherosclerosis: results of the  
37 Multicultural Community Health Assessment Trial (M-CHAT). *Stroke* 2007;38:2422-9.  
38  
39 28 Brauer M, Hystad P, Reynolds C. Environmental guidelines for urban and rural land  
40 development in British Columbia: supporting information on air quality. 2012.  
41  
42 29 Henderson SB, Beckerman B, Jerrett M, Brauer M. Application of land use regression to  
43 estimate long-term concentrations of traffic-related nitrogen oxides and fine particulate  
44 matter. *Environ Sci Technol* 2007;41:2422-8.  
45  
46 30 Larson T, Henderson SB, Brauer M. Mobile Monitoring of Particle Light Absorption  
47 Coefficient in an Urban Area as a Basis for Land Use Regression. *Environmental Science  
& Technology* 2009;43:4672-4678.  
48  
49 31 Brauer M, Lencar C, Tamburic L, Koehoorn M, Demers P, Karr C. A cohort study of  
50 traffic-related air pollution impacts on birth outcomes. *Environ Health Perspect*  
51 2008;116:680-6.  
52  
53 32 Wang RR, Henderson SB, Sbihi H, Allen RW, Brauer M. Temporal stability of land use  
54 regression models for traffic-related air pollution. *Atmospheric Environment*  
55 2013;64:312-319.  
56  
57 33 Aminbakhsh A, Frohlich J, Mancini GB. Detection of early atherosclerosis with B mode  
58 carotid ultrasonography: assessment of a new quantitative approach. *Clin Invest Med*  
59 1999;22:265-74.  
60

- 1  
2  
3 34 Chan SY, Mancini GB, Kuramoto L, Schulzer M, Frohlich J, Ignaszewski A. The  
4 prognostic importance of endothelial dysfunction and carotid atheroma burden in patients  
5 with coronary artery disease. *J Am Coll Cardiol* 2003;42:1037-43.  
6  
7 35 Gan WQ, McLean K, Brauer M, Chiarello SA, Davies HW. Modeling population  
8 exposure to community noise and air pollution in a large metropolitan area. *Environ Res*  
9 2012;116:11-6.  
10  
11 36 Lenters V, Uiterwaal CS, Beelen R et al. Long-term exposure to air pollution and vascular  
12 damage in young adults. *Epidemiology* 2010;21:512-20.  
13  
14 37 Johnson HM, Piper ME, Baker TB, Fiore MC, Stein JH. Effects of smoking and cessation  
15 on subclinical arterial disease: a substudy of a randomized controlled trial. *PLoS One*  
16 2012;7:e35332.  
17  
18 38 Wilker EH, Mittleman MA, Coull BA et al. Long-term Exposure to Black Carbon and  
19 Carotid Intima-Media Thickness: The Normative Aging Study. *Environ Health Perspect*  
20 2013;121:1061-7.  
21  
22 39 Painschab MS, Davila-Roman VG, Gilman RH et al. Chronic exposure to biomass fuel is  
23 associated with increased carotid artery intima-media thickness and a higher prevalence of  
24 atherosclerotic plaque. *Heart* 2013;99:984-91.  
25  
26 40 Rivera M, Basagana X, Aguilera I et al. Association between long-term exposure to  
27 traffic-related air pollution and subclinical atherosclerosis: the REGICOR study. *Environ*  
28 *Health Perspect* 2013;121:223-30.  
29  
30 41 Sun M, Kaufman JD, Kim SY et al. Particulate matter components and subclinical  
31 atherosclerosis: common approaches to estimating exposure in a Multi-Ethnic Study of  
32 Atherosclerosis cross-sectional study. *Environ Health* 2013;12:39.  
33  
34 42 Bonner MR, Han D, Nie J, Rogerson P, Vena JE, Freudenheim JL. Positional accuracy of  
35 geocoded addresses in epidemiologic research. *Epidemiology* 2003;14:408-12.  
36  
37 43 Xie SD, Zhang YH, Li Q, Tang XY. Spatial distribution of traffic-related pollutant  
38 concentrations in street canyons. *Atmospheric Environment* 2003;37:3213-3224.  
39  
40 44 Restrepo C, Zimmerman R, Thurston G et al. A comparison of ground-level air quality  
41 data with New York State Department of Environmental Conservation monitoring  
42 stations data in South Bronx, New York. *Atmospheric Environment* 2004;38:5295-5304.  
43  
44 45 Hystad PU, Setton EM, Allen RW, Keller PC, Brauer M. Modeling residential fine  
45 particulate matter infiltration for exposure assessment. *J Expo Sci Environ Epidemiol*  
46 2009;19:570-9.  
47  
48 46 Janssen NA, Hoek G, Brunekreef B, Harssema H, Mensink I, Zuidhof A. Personal  
49 sampling of particles in adults: relation among personal, indoor, and outdoor air  
50 concentrations. *Am J Epidemiol* 1998;147:537-47.  
51  
52 47 Nethery E, Leckie SE, Teschke K, Brauer M. From measures to models: an evaluation of  
53 air pollution exposure assessment for epidemiological studies of pregnant women. *Occup*  
54 *Environ Med* 2008;65:579-86.  
55  
56 48 Shanmugam N, Roman-Rego A, Ong P, Kaski JC. Atherosclerotic plaque regression: fact  
57 or fiction? *Cardiovasc Drugs Ther* 2010;24:311-7.  
58  
59  
60



## Supplementary Material

### Long-Term Exposure to Traffic-Related Air Pollution and Progression of Carotid Artery Atherosclerosis

Wen Qi Gan, Ryan W. Allen, Michael Brauer,  
Hugh W. Davies, G.B. John Mancini, Scott A. Lear

#### Table of Contents:

**Etable 1.** Comparisons of baseline characteristics for participants who were lost to and those who completed the follow-up

**Etable 2.** Comparisons of baseline carotid artery atherosclerosis for participants who were lost to and those who completed the follow-up

**Etable 3.** Number of participants (row percentage) with different annual changes in carotid atherosclerosis

**Etable 4.** Mean differences (95% CIs) in annual changes of carotid artery atherosclerosis between the group close to and the group away from major road (the reference category) for participants with increased carotid atherosclerosis

**Etable 5.** Relative risks (95% CIs) of having greater progression ( $\geq$  the 85th percentile) in annual changes of carotid atherosclerosis for participants living close to major roads compared with those living away from major roads

**Etable 6.** Comparisons of three cohort studies on air pollution and CIMT

**Table 1.** Comparisons of baseline characteristics for participants who were lost to and those who completed the follow-up<sup>a</sup>

| Characteristic                                     | Lost to follow-up<br>(n = 251) | Finished follow-up<br>(n = 509) | P value |
|----------------------------------------------------|--------------------------------|---------------------------------|---------|
| Age (year)                                         | 45.6 ± 8.5                     | 46.8 ± 9.0                      | 0.083   |
| Sex, male (%)                                      | 48                             | 49                              | 0.735   |
| Race (%)                                           |                                |                                 | < 0.001 |
| Aboriginal                                         | 37                             | 14                              |         |
| Chinese                                            | 25                             | 30                              |         |
| European                                           | 15                             | 29                              |         |
| South Asian                                        | 23                             | 27                              |         |
| Education (%)                                      |                                |                                 | < 0.001 |
| ≤ High school                                      | 44                             | 27                              |         |
| > High school                                      | 56                             | 73                              |         |
| Annual household income (%)                        |                                |                                 | < 0.001 |
| < \$30,000                                         | 39                             | 24                              |         |
| \$30,000 to \$60,000                               | 35                             | 37                              |         |
| ≥ \$60,000                                         | 26                             | 39                              |         |
| Smoke status (%)                                   |                                |                                 | < 0.001 |
| Current                                            | 17                             | 7                               |         |
| Former                                             | 25                             | 27                              |         |
| Never                                              | 58                             | 66                              |         |
| Alcohol intake (yes, %)                            | 23                             | 32                              | 0.015   |
| Physical activity <sup>b</sup><br>(hours per week) | 4.0<br>(1.7 – 8.1)             | 3.5<br>(1.7 – 6.5)              | 0.119   |
| Body mass index (kg/m <sup>2</sup> )               | 27.9 ± 5.0                     | 27.2 ± 4.7                      | 0.047   |
| SBP (mmHg)                                         | 117.9 ± 16.5                   | 118.1 ± 14.8                    | 0.862   |
| DBP (mmHg)                                         | 77.6 ± 11.3                    | 77.2 ± 9.4                      | 0.584   |
| Total cholesterol (mmol/L)                         | 5.2 ± 1.0                      | 5.2 ± 1.0                       | 0.810   |
| LDL-C (mmol/L)                                     | 3.2 ± 0.9                      | 3.2 ± 0.9                       | 0.460   |
| HDL-C (mmol/L)                                     | 1.3 ± 0.3                      | 1.3 ± 0.4                       | 0.746   |

Abbreviations: DBP, diastolic blood pressure; HDL-C, high-density lipoprotein cholesterol; LDL-C, low-density lipoprotein cholesterol; MET, metabolic equivalent of task; SBP, systolic blood pressure.

<sup>a</sup>Data are presented as percentage for categorical variables or mean ± SD for continuous variables; unless otherwise specified.

<sup>b</sup>Median (interquartile range).

**Table 2.** Comparisons of baseline carotid artery atherosclerosis for participants who were lost to and those who completed the follow-up<sup>a</sup>

| Atherosclerosis                | Lost to follow-up<br>(n = 251) | Finished follow-up<br>(n = 509) | <i>P</i> value |
|--------------------------------|--------------------------------|---------------------------------|----------------|
| CIMT (μm)                      | 677 ± 137                      | 673 ± 122                       | 0.656          |
| Plaque area (mm <sup>2</sup> ) | 6.26 ± 11.94                   | 6.61 ± 13.46                    | 0.728          |
| Plaque number                  | 0.87 ± 1.23                    | 0.88 ± 1.14                     | 0.915          |
| Total area (mm <sup>2</sup> )  | 19.8 ± 13.2                    | 20.0 ± 14.6                     | 0.798          |

<sup>a</sup>Data are presented as mean ± SD.

**Table 3.** Number of participants (row percentage) with different annual changes in carotid atherosclerosis

| Atherosclerosis                           | Decrease (< 0) | No change (= 0) | Increase (> 0) |
|-------------------------------------------|----------------|-----------------|----------------|
| CIMT ( $\mu\text{m}/\text{year}$ )        | 86<br>(17%)    | 27<br>(5%)      | 396<br>(78%)   |
| Plaque area ( $\text{mm}^2/\text{year}$ ) | 61<br>(12%)    | 145<br>(28%)    | 303<br>(60%)   |
| Plaque number (per year)                  | 29<br>(6%)     | 231<br>(45%)    | 249<br>(49%)   |
| Total area ( $\text{mm}^2/\text{year}$ )  | 86<br>(17%)    | 6<br>(1%)       | 417<br>(82%)   |

Abbreviations: CIMT, carotid intima-media thickness.

1  
2  
3  
4  
5  
6  
7  
8  
9  
10  
11  
12  
13  
14  
15  
16  
17  
18  
19  
20  
21  
22  
23  
24  
25  
26  
27  
28  
29  
30  
31  
32  
33  
34  
35  
36  
37  
38  
39  
40  
41  
42  
43  
44  
45  
46  
47  
48  
49

**Table 4.** Mean differences (95% CIs) in annual changes of carotid artery atherosclerosis between the group close to and the group away from major road (the reference category) for participants with increased carotid atherosclerosis (annual change > 0)

| Atherosclerosis                                                                                 | Close to major roads <sup>a</sup> | Away from major roads <sup>a</sup> | Difference <sup>bc</sup> (model 1) | Difference <sup>bc</sup> (model 2) | Difference <sup>bc</sup> (model 3) | Difference <sup>bc</sup> (model 4) |
|-------------------------------------------------------------------------------------------------|-----------------------------------|------------------------------------|------------------------------------|------------------------------------|------------------------------------|------------------------------------|
| CIMT (µm/year)<br>(n <sub>1</sub> = 90, n <sub>2</sub> = 306) <sup>d</sup>                      | 12.4 ± 9.1                        | 13.6 ± 9.6                         | -1.20<br>(-3.52 to 1.13)           | -1.68<br>(-4.02 to 0.66)           | -1.65<br>(-4.03 to 0.72)           | -1.08<br>(-3.51 to 1.35)           |
| Plaque area (mm <sup>2</sup> /year)<br>(n <sub>1</sub> = 76, n <sub>2</sub> = 227) <sup>d</sup> | 2.19 ± 3.04                       | 2.30 ± 2.42                        | -0.11<br>(-0.82 to 0.59)           | -0.08<br>(-0.76 to 0.59)           | -0.06<br>(-0.74 to 0.63)           | 0.00<br>(-0.70 to 0.71)            |
| Plaque number (per year)<br>(n <sub>1</sub> = 64, n <sub>2</sub> = 185) <sup>d</sup>            | 0.23 ± 0.20                       | 0.23 ± 0.19                        | 0.00<br>(-0.06 to 0.05)            | -0.01<br>(-0.06 to 0.05)           | -0.01<br>(-0.06 to 0.05)           | -0.01<br>(-0.07 to 0.04)           |
| Total area (mm <sup>2</sup> /year)<br>(n <sub>1</sub> = 100, n <sub>2</sub> = 317) <sup>d</sup> | 1.84 ± 2.86                       | 1.85 ± 2.34                        | -0.02<br>(-0.59 to 0.56)           | -0.11<br>(-0.67 to 0.44)           | -0.11<br>(-0.67 to 0.44)           | -0.02<br>(-0.58 to 0.53)           |

Abbreviations: CIMT, carotid intima-media thickness.

<sup>a</sup>Data are presented as mean ± standard deviation.

<sup>b</sup>Difference of least squares means between the group close to and the group away from major roads (the group away from major roads was the reference category).

<sup>c</sup>Model 1 was a crude unadjusted model; model 2 was adjusted for age, sex, and ethnicity; model 3 was further adjusted for BMI, smoking status, physical activity, education, and annual household income; model 4 was additionally adjusted for systolic blood pressure, LDL-C, HDL-C, neighborhood income levels, and neighborhood education levels.

<sup>d</sup>n<sub>1</sub> is for participants living close to major roads, n<sub>2</sub> is for participants living away from major roads.

**Table 5.** Relative risks (95% CIs) of having greater progression ( $\geq$  the 85th percentile) in annual changes of carotid artery atherosclerosis for participants living close to major roads compared with those living away from major roads (the reference category)<sup>a</sup>

| Annual change $\geq$<br>85th percentile             | RR (95% CI) <sup>b</sup><br>(model 1) | RR (95% CI) <sup>b</sup><br>(model 2) | RR (95% CI) <sup>b</sup><br>(model 3) | RR (95% CI) <sup>b</sup><br>(model 4) |
|-----------------------------------------------------|---------------------------------------|---------------------------------------|---------------------------------------|---------------------------------------|
| CIMT $\geq$ 19.19 $\mu\text{m}/\text{year}^c$       | 0.99 (0.55 -1.78)                     | 0.78 (0.42-1.42)                      | 0.77 (0.42-1.42)                      | 0.81 (0.42-1.57)                      |
| Plaque area $\geq$ 2.95 $\text{mm}^2/\text{year}^c$ | 0.81 (0.44-1.51)                      | 0.50 (0.26-0.95)                      | 0.54 (0.28-1.05)                      | 0.55 (0.27-1.12)                      |
| Plaque number $\geq$ 0.36 per year <sup>c</sup>     | 1.07 (0.60-1.89)                      | 0.80 (0.45-1.45)                      | 0.81 (0.44-1.47)                      | 0.78 (0.42-1.46)                      |
| Total area $\geq$ 3.17 $\text{mm}^2/\text{year}^c$  | 0.84 (0.45-1.57)                      | 0.50 (0.26-0.96)                      | 0.56 (0.29-1.10)                      | 0.58 (0.29-1.20)                      |

Abbreviations: CI, confidence interval; CIMT, carotid intima-media thickness; RR, relative risk.

<sup>a</sup>The Cox proportional hazard model was used for the data analyses.

<sup>b</sup>Model 1 was a crude unadjusted model; model 2 was adjusted for age, sex, and ethnicity; model 3 was further adjusted for BMI, smoking status, physical activity, education, and annual household income; model 4 was additionally adjusted for systolic blood pressure, LDL-C, HDL-C, neighborhood income levels, and neighborhood education levels.

<sup>c</sup>The 85th percentile for the atherosclerosis marker.

**Etable 6.** Comparisons of three cohort studies on air pollution and CIMT<sup>a</sup>

| Characteristic                                  | Current Study<br>(n = 509) | Adar <i>et al.</i> 2013 <sup>1</sup><br>(n = 4955) | Kunzli <i>et al.</i> 2010 <sup>2</sup><br>(n = 1483) |
|-------------------------------------------------|----------------------------|----------------------------------------------------|------------------------------------------------------|
| Region                                          | Vancouver,<br>Canada       | Los Angeles and<br>other 5 U.S. cities             | Los Angeles                                          |
| Baseline PM <sub>2.5</sub> (µg/m <sup>3</sup> ) | 4.1 ± 1.5                  | 16.6 ± 3.7                                         | 27.8 ± 2.4                                           |
| Mean follow-up time (years)                     | 5.5 ± 0.4                  | 2.5 ± 0.8                                          | 1.8 – 3.3 <sup>b</sup>                               |
| Age (year)                                      | 47 ± 9                     | 62 ± 10                                            | 59 ± 10                                              |
| Male sex (%)                                    | 49                         | 38                                                 | 37                                                   |
| BMI (kg/m <sup>2</sup> )                        | 27.2 ± 4.8                 | 28.2 ± 5.3                                         | 29.2 ± 5.5                                           |
| Current smokers (%)                             | 7                          | 12                                                 | 3                                                    |
| LDL-C (mmol/L)                                  | 3.2 ± 0.9                  | 3.0 ± 0.8                                          | 3.5 ± 0.9                                            |
| SBP (mmHg)                                      | 118 ± 15                   | 126 ± 21                                           | 131 ± 18                                             |
| Baseline CIMT (µm)                              | 673 ± 122                  | 678 ± 189                                          | 780 ± 150                                            |
| Annual change in CIMT (µm/yr)                   | 9.2 ± 12.1                 | 14.0 ± 53.0                                        | 2.0 ± 12.9                                           |

Abbreviations: CIMT, carotid intima-media thickness; LDL-C, low-density lipoprotein cholesterol; SBP, systolic blood pressure.

<sup>a</sup>Data are presented as percentage for categorical variables and mean ± SD for continuous variables.

<sup>b</sup>Range of average follow-up time for the five clinical trials.

**REFERENCES**

1  
2  
3  
4  
5  
6  
7  
8  
9  
10  
11  
12  
13  
14  
15  
16  
17  
18  
19  
20  
21  
22  
23  
24  
25  
26  
27  
28  
29  
30  
31  
32  
33  
34  
35  
36  
37  
38  
39  
40  
41  
42  
43  
44  
45  
46  
47  
48  
49  
50  
51  
52  
53  
54  
55  
56  
57  
58  
59  
60

1. **Adar SD**, Sheppard L, Vedal S et al. Fine particulate air pollution and the progression of carotid intima-medial thickness: a prospective cohort study from the multi-ethnic study of atherosclerosis and air pollution. *PLoS Med* 2013;**10**:e1001430.

2. **Kunzli N**, Jerrett M, Garcia-Esteban R et al. Ambient air pollution and the progression of atherosclerosis in adults. *PLoS One* 2010;**5**:e9096.



STROBE 2007 (v4) Statement—Checklist of items that should be included in reports of cohort studies

| Section/Topic             | Item # | Recommendation                                                                                                                                                                       | Reported on page # |
|---------------------------|--------|--------------------------------------------------------------------------------------------------------------------------------------------------------------------------------------|--------------------|
| Title and abstract        | 1      | (a) Indicate the study’s design with a commonly used term in the title or the abstract                                                                                               | 1-2                |
|                           |        | (b) Provide in the abstract an informative and balanced summary of what was done and what was found                                                                                  | 2-3                |
| <b>Introduction</b>       |        |                                                                                                                                                                                      |                    |
| Background/rationale      | 2      | Explain the scientific background and rationale for the investigation being reported                                                                                                 | 4-5                |
| Objectives                | 3      | State specific objectives, including any prespecified hypotheses                                                                                                                     | 5                  |
| <b>Methods</b>            |        |                                                                                                                                                                                      |                    |
| Study design              | 4      | Present key elements of study design early in the paper                                                                                                                              | 6                  |
| Setting                   | 5      | Describe the setting, locations, and relevant dates, including periods of recruitment, exposure, follow-up, and data collection                                                      | 6-10               |
| Participants              | 6      | (a) Give the eligibility criteria, and the sources and methods of selection of participants. Describe methods of follow-up                                                           | 6                  |
|                           |        | (b) For matched studies, give matching criteria and number of exposed and unexposed                                                                                                  | na                 |
| Variables                 | 7      | Clearly define all outcomes, exposures, predictors, potential confounders, and effect modifiers. Give diagnostic criteria, if applicable                                             | 7-10               |
| Data sources/ measurement | 8*     | For each variable of interest, give sources of data and details of methods of assessment (measurement). Describe comparability of assessment methods if there is more than one group | 7-10               |
| Bias                      | 9      | Describe any efforts to address potential sources of bias                                                                                                                            | 10-11              |
| Study size                | 10     | Explain how the study size was arrived at                                                                                                                                            | 12                 |
| Quantitative variables    | 11     | Explain how quantitative variables were handled in the analyses. If applicable, describe which groupings were chosen and why                                                         | 10-11              |
| Statistical methods       | 12     | (a) Describe all statistical methods, including those used to control for confounding                                                                                                | 10-11              |
|                           |        | (b) Describe any methods used to examine subgroups and interactions                                                                                                                  | 10-11              |
|                           |        | (c) Explain how missing data were addressed                                                                                                                                          | 12                 |
|                           |        | (d) If applicable, explain how loss to follow-up was addressed                                                                                                                       | 12                 |
|                           |        | (e) Describe any sensitivity analyses                                                                                                                                                | 10-11              |
| <b>Results</b>            |        |                                                                                                                                                                                      |                    |

|                          |     |                                                                                                                                                                                                              |       |
|--------------------------|-----|--------------------------------------------------------------------------------------------------------------------------------------------------------------------------------------------------------------|-------|
| Participants             | 13* | (a) Report numbers of individuals at each stage of study—eg numbers potentially eligible, examined for eligibility, confirmed eligible, included in the study, completing follow-up, and analysed            | 12    |
|                          |     | (b) Give reasons for non-participation at each stage                                                                                                                                                         | 12    |
|                          |     | (c) Consider use of a flow diagram                                                                                                                                                                           | na    |
| Descriptive data         | 14* | (a) Give characteristics of study participants (eg demographic, clinical, social) and information on exposures and potential confounders                                                                     | 12    |
|                          |     | (b) Indicate number of participants with missing data for each variable of interest                                                                                                                          | 12    |
|                          |     | (c) Summarise follow-up time (eg, average and total amount)                                                                                                                                                  | 12    |
| Outcome data             | 15* | Report numbers of outcome events or summary measures over time                                                                                                                                               | 13    |
| Main results             | 16  | (a) Give unadjusted estimates and, if applicable, confounder-adjusted estimates and their precision (eg, 95% confidence interval). Make clear which confounders were adjusted for and why they were included | 13-14 |
|                          |     | (b) Report category boundaries when continuous variables were categorized                                                                                                                                    | 13-14 |
|                          |     | (c) If relevant, consider translating estimates of relative risk into absolute risk for a meaningful time period                                                                                             | na    |
| Other analyses           | 17  | Report other analyses done—eg analyses of subgroups and interactions, and sensitivity analyses                                                                                                               | 13-14 |
| <b>Discussion</b>        |     |                                                                                                                                                                                                              |       |
| Key results              | 18  | Summarise key results with reference to study objectives                                                                                                                                                     | 14    |
| <b>Limitations</b>       |     |                                                                                                                                                                                                              |       |
| Interpretation           | 20  | Give a cautious overall interpretation of results considering objectives, limitations, multiplicity of analyses, results from similar studies, and other relevant evidence                                   | 18    |
| Generalisability         | 21  | Discuss the generalisability (external validity) of the study results                                                                                                                                        | 18    |
| <b>Other information</b> |     |                                                                                                                                                                                                              |       |
| Funding                  | 22  | Give the source of funding and the role of the funders for the present study and, if applicable, for the original study on which the present article is based                                                | 19    |

\*Give information separately for cases and controls in case-control studies and, if applicable, for exposed and unexposed groups in cohort and cross-sectional studies.

**Note:** An Explanation and Elaboration article discusses each checklist item and gives methodological background and published examples of transparent reporting. The STROBE checklist is best used in conjunction with this article (freely available on the Web sites of PLoS Medicine at <http://www.plosmedicine.org/>, Annals of Internal Medicine at <http://www.annals.org/>, and Epidemiology at <http://www.epidem.com/>). Information on the STROBE Initiative is available at [www.strobe-statement.org](http://www.strobe-statement.org).
